# Supplementary material
Source: publisher figshare collection journal article supplement (https://springernature.figshare.com/ndownloader/files/28320208)
Supplement: Supplementary file 1 [file 28320208]

## Sheet: Oil
Sample ID	Support	Binding Medium/Brand	Pigment	Aging Time	Type of Mechanical Property	Mechanical Property (MPa)	αEstimated from Graph βEstimated from Stiffness	Temperature (°C)	Relative Humidity (%)	Strain Rate (s-1)	Other testing conditions	Reference (BibTex)
1.01		Linseed Oil	Naples Yellow	13 years	E	689		23	50	0.0005		[#mecklenburg_introduction_1991]
1.02		Linseed Oil	Naples Yellow	3.75 years	E	304.7		23	47	0.0005		[#mecklenburg_introduction_1991]
1.03		Linseed Oil	Naples Yellow	13 years	E	1310		23	5	0.0005		[#mecklenburg_introduction_1991]
1.04		Linseed Oil	Naples Yellow	13 years	E	1440		23	5	0.0005	strain hardened	[#mecklenburg_introduction_1991]
1.05		Linseed Oil	Naples Yellow	13 years	E	110		23	91	0.0005		[#mecklenburg_introduction_1991]
1.06		Linseed Oil	Naples Yellow	13 years	E	4019		-3	5	0.0005		[#mecklenburg_introduction_1991]
1.07		Linseed Oil	Naples Yellow	13 years	E	2627		-3	42	0.0005		[#mecklenburg_introduction_1991]
1.08		Linseed Oil	Naples Yellow	13 years	E	2600		-3	51	0.0005		[#mecklenburg_introduction_1991]
1.09		Linseed Oil	Naples Yellow	13 years	E	1172		23	50	0.0005	strain hardened	[#mecklenburg_introduction_1991]
2.01		Linseed Oil	Burnt Sienna	13 years	E	137.9		23	50	0.0005		[#mecklenburg_introduction_1991]
2.02		Linseed Oil	Burnt Sienna	13 years	E	173.7		23	50	0.0005	strain hardened	[#mecklenburg_introduction_1991]
2.03		Linseed Oil	Burnt Sienna	13 years	E	641		23	5	0.0005		[#mecklenburg_introduction_1991]
2.04		Linseed Oil	Burnt Sienna	13 years	E	561		23	5	0.0005	strain hardened	[#mecklenburg_introduction_1991]
2.05		Linseed Oil	Burnt Sienna	13 years	E	4.48		23	91	0.0005		[#mecklenburg_introduction_1991]
2.06		Linseed Oil	Burnt Sienna	13 years	E	2757		-3	5	0.0005		[#mecklenburg_introduction_1991]
2.07		Linseed Oil	Burnt Sienna	13 years	E	868		-3	42	0.0005		[#mecklenburg_introduction_1991]
2.08		Linseed Oil	Burnt Sienna	13 years	E	241		-3	51	0.0005		[#mecklenburg_introduction_1991]
3.01		Safflower Oil	Flake White	13 years	E	689		23	50	0.0005		[#mecklenburg_introduction_1991]
3.02		Safflower Oil	Flake White	3.75 years	E	413.6		23	45	0.0005		[#mecklenburg_introduction_1991]
4.01		Safflower Oil	Vermilion	13 years	E	737		23	50	0.0005		[#mecklenburg_introduction_1991]
4.02		Safflower Oil	Vermilion	13 years	E	1241		23	50	0.0005	strained hardened	[#mecklenburg_introduction_1991]
4.03		Safflower Oil	Vermilion	3 years	E	462		23	55	0.0005		[#mecklenburg_introduction_1991]
5.01		Linseed Oil	Burnt Umber	13 years	E	34.5		23	50	0.0005		[#mecklenburg_introduction_1991]
6.01		Acid-refined Linseed Oil	Lead White	8 years	E	280	α	23	48	0.0005		[#tumosa_effects_1999]
6.02		Acid-refined Linseed Oil	Lead White	8 years	E	280	α	23	48	0.0005	exposed to toluene 30 seconds, dried 24 hours	[#tumosa_effects_1999]
6.03		Acid-refined Linseed Oil	Lead White	8 years	E	330	α	23	48	0.0005	exposed to toluene 1 minute, dried 24 hours	[#tumosa_effects_1999]
6.04		Acid-refined Linseed Oil	Lead White	8 years	E	500	α	23	48	0.0005	exposed to toluene 1 hour, dried 24 hours	[#tumosa_effects_1999]
6.05		Acid-refined Linseed Oil	Lead White	8 years	E	660	α	23	48	0.0005	exposed to toluene 24 hours, dried 24 hours	[#tumosa_effects_1999]
6.06		Acid-refined Linseed Oil	Lead White	8 years	E	65	α	23	48	0.0005	exposed to toluene 1 minute, dried 1 hour	[#tumosa_effects_1999]
6.07		Acid-refined Linseed Oil	Lead White	8 years	E	136	α	23	48	0.0005	exposed to triethalonamine (TEA) 1 minute, dried 24 hours	[#tumosa_effects_1999]
6.08		Acid-refined Linseed Oil	Lead White	8 years	E	73	α	23	48	0.0005	exposed to triethalonamine (TEA) 1 minute, toluene 1 minute, dried 24 hours	[#tumosa_effects_1999]
6.09		Acid-refined Linseed Oil	Lead White	8 years	E	250	α	23	48	0.0005	exposed to triethalonamine (TEA) 1 minute, toluene 5 minutes, dried 24 hours	[#tumosa_effects_1999]
6.1		Acid-refined Linseed Oil	Lead White	8 years	E	5	α	23	48	0.0005	exposed to triethalonamine (TEA) 46 hours, dried 24 hours	[#tumosa_effects_1999]
7.01		Cold-pressed Linseed Oil	Malachite	6 years	E	47	α	23	48	0.0005		[#tumosa_effects_1999]
7.02		Cold-pressed Linseed Oil	Malachite	6 years	E	94	α	23	48	0.0005	exposed to toluene 30 seconds, dried 24 hours	[#tumosa_effects_1999]
7.03		Cold-pressed Linseed Oil	Malachite	6 years	E	340	α	23	48	0.0005	exposed to toluene 1 minute, dried 24 hours	[#tumosa_effects_1999]
7.04		Cold-pressed Linseed Oil	Malachite	6 years	E	1200	α	23	48	0.0005	exposed to toluene 1 hour, dried 24 hours	[#tumosa_effects_1999]
7.05		Cold-pressed Linseed Oil	Malachite	6 years	E	786	α	23	48	0.0005	exposed to toluene 24 hours, dried 24 hours	[#tumosa_effects_1999]
7.06		Cold-pressed Linseed Oil	Malachite	6 years	E	94	α	23	48	0.0005	exposed to toluene 1 minute, dried 1 hour	[#tumosa_effects_1999]
8.01		Cold-pressed Linseed Oil	Lead Carbonate	0.184 years	E	18	α	22	50	0.0005		[#mecklenburg_traditional_2001]
8.02		Cold-pressed Linseed Oil	Lead Carbonate	0.269 years	E	28	α	22	50	0.0005		[#mecklenburg_traditional_2001]
8.03		Cold-pressed Linseed Oil	Lead Carbonate	0.98 years	E	91	α	22	50	0.0005		[#mecklenburg_traditional_2001]
8.04		Cold-pressed Linseed Oil	Lead Carbonate	10 years	E	260	α	22	50	0.0005		[#mecklenburg_traditional_2001]
9.01	Linen	Linseed Oil	Animal Glue, Lead White	0 days (thermal aging)	E	40.6	β	20	15	0.001	thermal aging at 60◦C/55 % RH, samples cut along warp direction	[#carr_development_2003]
9.02	Linen	Linseed Oil	Animal Glue, Lead White	0 days (thermal aging)	E	28.2	β	20	55	0.001	thermal aging at 60◦C/55 % RH, samples cut along warp direction	[#carr_development_2003]
9.03	Linen	Linseed Oil	Animal Glue, Lead White	0 days (thermal aging)	E	20.2	β	20	95	0.001	thermal aging at 60◦C/55 % RH, samples cut along warp direction	[#carr_development_2003]
9.04	Linen	Linseed Oil	Animal Glue, Lead White	28 days (thermal aging)	E	44.7	β	20	15	0.001	thermal aging at 60◦C/55 % RH, samples cut along warp direction	[#carr_development_2003]
9.05	Linen	Linseed Oil	Animal Glue, Lead White	28 days (thermal aging)	E	37	β	20	55	0.001	thermal aging at 60◦C/55 % RH, samples cut along warp direction	[#carr_development_2003]
9.06	Linen	Linseed Oil	Animal Glue, Lead White	28 days (thermal aging)	E	15.3	β	20	95	0.001	thermal aging at 60◦C/55 % RH, samples cut along warp direction	[#carr_development_2003]
9.07	Linen	Linseed Oil	Animal Glue, Lead White	56 days (thermal aging)	E	47.3	β	20	15	0.001	thermal aging at 60◦C/55 % RH, samples cut along warp direction	[#carr_development_2003]
9.08	Linen	Linseed Oil	Animal Glue, Lead White	56 days (thermal aging)	E	31.3	β	20	55	0.001	thermal aging at 60◦C/55 % RH, samples cut along warp direction	[#carr_development_2003]
9.09	Linen	Linseed Oil	Animal Glue, Lead White	56 days (thermal aging)	E	16.8	β	20	95	0.001	thermal aging at 60◦C/55 % RH, samples cut along warp direction	[#carr_development_2003]
9.1	Linen	Linseed Oil	Animal Glue, Lead White	112 days (thermal aging)	E	44.7	β	20	15	0.001	thermal aging at 60◦C/55 % RH, samples cut along warp direction	[#carr_development_2003]
9.11	Linen	Linseed Oil	Animal Glue, Lead White	112 days (thermal aging)	E	32.8	β	20	55	0.001	thermal aging at 60◦C/55 % RH, samples cut along warp direction	[#carr_development_2003]
9.12	Linen	Linseed Oil	Animal Glue, Lead White	112 days (thermal aging)	E	11.9	β	20	95	0.001	thermal aging at 60◦C/55 % RH, samples cut along warp direction	[#carr_development_2003]
58.01		Cold-pressed Safflower Oil	Lead Carbonate	0.13 years	Es	18	α	23	48		Es at 1% strain	[#mecklenburg_changing_2004]
58.02		Cold-pressed Safflower Oil	Lead Carbonate	0.27 years	Es	24	α	23	48		Es at 1% strain	[#mecklenburg_changing_2004]
58.03		Cold-pressed Safflower Oil	Lead Carbonate	0.98 years	Es	51	α	23	48		Es at 1% strain	[#mecklenburg_changing_2004]
58.04		Cold-pressed Safflower Oil	Lead Carbonate	9.5 years	Es	93	α	23	48		Es at 1% strain	[#mecklenburg_changing_2004]
58.05		Cold-pressed Safflower Oil	Lead Carbonate	14.5 years	Es	122	α	23	48		Es at 1% strain	[#mecklenburg_changing_2004]
59.01		Cold-pressed Linseed Oil	Raw Umber	12.25 years	E	5		23	48			[#mecklenburg_changing_2004]
60.01		Cold-pressed Linseed Oil	Red Iron Oxide	12.25 years	E	5		23	48			[#mecklenburg_changing_2004]
61.01		Cold-pressed Linseed Oil	Malachite	12.25 years	E	89		23	48			[#mecklenburg_changing_2004]
62.01		Cold-pressed Linseed Oil	Titanium Dioxide	14.5 years	E	140		23	48			[#mecklenburg_changing_2004]
63.01		Cold-pressed Linseed Oil	Basic lead carbonate	14.75 years	E	300		23	48			[#mecklenburg_changing_2004]
64.01		Cold-pressed Linseed OIl	Zinc Oxide	14.5 years	E	1667		23	48			[#mecklenburg_changing_2004]
64.02		Cold-pressed Linseed Oil	Zinc Oxide	14.5 years	Es	340	α	-10	46		Es at 0.1% strain	[#mecklenburg_changing_2004]
64.03		Cold-pressed Linseed Oil	Zinc Oxide	14.5 years	Es	185	α	23	10		Es at 0.1% strain	[#mecklenburg_changing_2004]
64.04		Cold-pressed Linseed Oil	Zinc Oxide	14.5 years	Es	200	α	23	48		Es at 0.1% strain	[#mecklenburg_changing_2004]
33.13		Cold-pressed Linseed Oil	Lead Carbonate	14.5 years	Es	375	α	23	10		Es at 1% strain	[#mecklenburg_changing_2004]
33.14		Cold-pressed Linseed Oil	Lead Carbonate	14.5 years	Es	530	α	-10	46		Es at 0.25% strain	[#mecklenburg_changing_2004]
65.01		Alkali-refined Linseed Oil	Lead Carbonate	14.5 years	Es	200	α	23	48		Es at 1% strain	[#mecklenburg_changing_2004]
65.02		Alkali-refined Linseed Oil	Lead Carbonate	14.5 years	Es	260	α	23	10		Es at 1% strain	[#mecklenburg_changing_2004]
65.03		Alkali-refined Linseed Oil	Lead Carbonate	14.5 years	Es	1130	α	-10	48		Es at 1% strain	[#mecklenburg_changing_2004]
66.01		Alkali-refined Linseed Oil (commercial)	Titanium Dioxide	7.5 years, 0 days thermal aging	Es	63	α	23	48		Es at 1% strain; Thermal aging at 50°C	[#mecklenburg_changing_2004]
66.02		Alkali-refined Linseed Oil (commercial)	Titanium Dioxide	7.5 years, 61 days thermal aging	Es	85	α	23	48		Es at 1% strain; Thermal aging at 50°C	[#mecklenburg_changing_2004]
66.03		Alkali-refined Linseed Oil (commercial)	Titanium Dioxide	7.5 years, 126 days thermal aging	Es	130	α	23	48		Es at 1% strain; Thermal aging at 50°C	[#mecklenburg_changing_2004]
66.04		Alkali-refined Linseed Oil (commercial)	Titanium Dioxide	7.5 years, 160 days thermal aging	Es	120	α	23	48		Es at 1% strain; Thermal aging at 50°C	[#mecklenburg_changing_2004]
66.05		Alkali-refined Linseed Oil (commercial)	Titanium Dioxide	7.5 years, 300 days thermal aging	Es	120	α	23	48		Es at 1% strain; Thermal aging at 50°C	[#mecklenburg_changing_2004]
66.06		Alkali-refined Linseed Oil (commercial)	Titanium Dioxide	7.5 years	Es	94	α	23	48		Es at 1% strain; Soaked in acetone 60 sec, dried	[#mecklenburg_changing_2004]
67.01		Alkali-refined Safflower Oil (commercial)	Titanium Dioxide	7.5 years, 0 days thermal aging	Es	50	α	23	48		Es at 1% strain; Thermal aging at 50°C	[#mecklenburg_changing_2004]
67.02		Alkali-refined Safflower Oil (commercial)	Titanium Dioxide	7.5 years, 61 days thermal aging	Es	69	α	23	48		Es at 1% strain; Thermal aging at 50°C	[#mecklenburg_changing_2004]
67.03		Alkali-refined Safflower Oil (commercial)	Titanium Dioxide	7.5 years, 126 days thermal aging	Es	75	α	23	48		Es at 1% strain; Thermal aging at 50°C	[#mecklenburg_changing_2004]
67.04		Alkali-refined Safflower Oil (commercial)	Titanium Dioxide	7.5 years, 160 days thermal aging	Es	73	α	23	48		Es at 1% strain; Thermal aging at 50°C	[#mecklenburg_changing_2004]
67.05		Alkali-refined Safflower Oil (commercial)	Titanium Dioxide	7.5 years, 300 days thermal aging	Es	99	α	23	48		Es at 1% strain; Thermal aging at 50°C	[#mecklenburg_changing_2004]
67.06		Alkali-refined Safflower Oil (commercial)	Titanium Dioxide	7.5 years	Es	75	α	23	48		Es at 1% strain; Soaked in acetone 60 sec, dried	[#mecklenburg_changing_2004]
10.01		Cold-pressed Linseed Oil	Red Iron Oxide	3.75 years	E	54	α	20	45	0.0005		[#tumosa_linseed_2005]
10.01		Cold-pressed Linseed Oil	Red Iron Oxide	3.75 years	σT	2.6	α	20	45	0.0005		[#tumosa_linseed_2005]
11.01		Cold-pressed Linseed Oil	Red Iron Oxide	3.75 years	E	26	α	20	45	0.0005	Oil 25% hydrolyzed	[#tumosa_linseed_2005]
11.01		Cold-pressed Linseed Oil	Red Iron Oxide	3.75 years	σT	0.8	α	20	45	0.0005	Oil 25% hydrolyzed	[#tumosa_linseed_2005]
12.01		Cold-pressed Linseed Oil	Red Iron Oxide	3.75 years	E	15	α	20	45	0.0005	Oil 50% hydrolyzed	[#tumosa_linseed_2005]
12.01		Cold-pressed Linseed Oil	Red Iron Oxide	3.75 years	σT	0.3	α	20	45	0.0005	Oil 50% hydrolyzed	[#tumosa_linseed_2005]
13.01		Cold-pressed Linseed Oil	Red Iron Oxide	3.75 years	E	9.7	α	20	45	0.0005	Oil 75% hydrolyzed	[#tumosa_linseed_2005]
13.01		Cold-pressed Linseed Oil	Red Iron Oxide	3.75 years	σT	0.1	α	20	45	0.0005	Oil 75% hydrolyzed	[#tumosa_linseed_2005]
14.01		Cold-pressed Linseed Oil	Red Iron Oxide	3.75 years	E	6.3	α	20	45	0.0005	Oil 100% hydrolyzed	[#tumosa_linseed_2005]
14.01		Cold-pressed Linseed Oil	Red Iron Oxide	3.75 years	σT	0.1	α	20	45	0.0005	Oil 100% hydrolyzed	[#tumosa_linseed_2005]
15.01	Golden Acrylic Gesso Primer	Michael Harding	Cadmium Sulfoselenide	6 days ambient, 0 days thermal aging	Es	0.03		20	55	0.001	2-layer system; Thermal aging at 60°C/55% RH; Es at 5.0% strain	[#young_interfacial_2007]
16.01	Spectrum Alkyd Primer	Michael Harding	Cadmium Sulfoselenide	6 days ambient, 82 days thermal aging	Es	0.4		20	55	0.001	2-layer system; Thermal aging at 60°C/55% RH; Es at 5.0% strain	[#young_interfacial_2007]
17.01	Spectrum Alkyd Primer	Michael Harding	Cadmium Sulfoselenide	6 days ambient, 0 days thermal aging	Es	0.1		20	55	0.001	2-layer system; Thermal aging at 60°C/55% RH; Es at 5.0% strain	[#young_interfacial_2007]
18.01		Winsor & Newton Foundation White		7 months	E	5230		-10	55	0.002		[#young_cold_2008]
18.02		Winsor & Newton Foundation White		8 months	E	4590		0	60	0.002		[#young_cold_2008]
18.03		Winsor & Newton Foundation White		9 months	E	2925		10	57	0.002		[#young_cold_2008]
18.04		Winsor & Newton Foundation White		10 months	E	1875		20	54	0.002		[#young_cold_2008]
19.01		H. Schincke Normal Professional	Alizarin Red	5 months	Es	6	α				Ambient Conditions; Es at 1% strain	[#fuesers_influence_2008]
20.01		H. Schincke Normal Professional	Phthalocyanine Blue	5 months	Es	1.5	α				Ambient Conditions; Es at 1% strain	[#fuesers_influence_2008]
21.01		H. Schincke Normal Professional	Ivory Black	5 months	Es	1.5	α				Ambient Conditions; Es at 1% strain	[#fuesers_influence_2008]
22.01		H. Schincke Normal Professional	Titanium White	5 months	Es	130	α				Ambient Conditions; Es at 1% strain	[#fuesers_influence_2008]
23.01		H. Schincke Normal Professional	Hansa Yellow	5 months	Es	6	α				Ambient Conditions; Es at 1% strain	[#fuesers_influence_2008]
23.02		H. Schincke Normal Professional	Hansa Yellow	5 months	Es	7	α				Ambient Conditions; Es at 1% strain; Immersed in water 1 min, Dried 4 weeks	[#fuesers_influence_2008]
23.03		H. Schincke Normal Professional	Hansa Yellow	5 months	Es	12	α				Ambient Conditions; Es at 1% strain; Immersed in n-hexane 1 min, Dried 4 weeks	[#fuesers_influence_2008]
23.04		H. Schincke Normal Professional	Hansa Yellow	5 months	Es	10	α				Ambient Conditions; Es at 1% strain; Immersed in ethanol 1 min, Dried 4 weeks	[#fuesers_influence_2008]
23.05		H. Schincke Normal Professional	Hansa Yellow	5 months	Es	11	α				Ambient Conditions; Es at 1% strain; Immersed in toluene 1 min, Dried 4 weeks	[#fuesers_influence_2008]
23.06		H. Schincke Normal Professional	Hansa Yellow	5 months	Es	17	α				Ambient Conditions; Es at 1% strain; Immersed in diethyl ether 1 min, Dried 4 weeks	[#fuesers_influence_2008]
23.07		H. Schincke Normal Professional	Hansa Yellow	5 months	Es	32	α				Ambient Conditions; Es at 1% strain; Immersed in chloroform 1 min, Dried 4 weeks	[#fuesers_influence_2008]
23.08		H. Schincke Normal Professional	Hansa Yellow	5 months	Es	57	α				Ambient Conditions; Es at 1% strain; Immersed in diethyl ether 1 min, Dried 4 weeks	[#fuesers_influence_2008]
23.09		H. Schincke Normal Professional	Hansa Yellow	5 months	Es		α				Ambient Conditions; Es at 1% strain; Immersed in acetone 1 min, Dried 4 weeks	[#fuesers_influence_2008]
24.01		Cold-pressed Linseed Oil		7 years	Es	0.1	α	23	50	0.0005	Es at 1% strain	[#tumosa_oil_2013]
25.01		Grumbacher Oil Paint	Burnt Umber	28 years	Es	14	α	23	50	0.0005	Es at 1% strain; 1.3% Mn	[#tumosa_oil_2013]
26.01		Gamblin Oil Paint	Burnt Umber	7 years	Es	18	α	23	50	0.0005	Es at 1% strain; 9.1% Mn	[#tumosa_oil_2013]
27.01		Grumbacher Oil Paint	Burnt Umber	7 years	Es	56	α	23	50	0.0005	Es at 1% strain; 19.1% Mn	[#tumosa_oil_2013]
18.01		Winsor & Newton Oil Paint	Burnt Umber	7 years	Es	78	α	23	50	0.0005	Es at 1% strain; 11.7% Mn	[#tumosa_oil_2013]
29.01		Winsor & Newton Oil Paint	Burnt Umber	25 years	Es	150	α	23	50	0.0005	Es at 1% strain; 18.3% Mn	[#tumosa_oil_2013]
30.01		Cold-pressed Linseed Oil	Calcium Carbonate	14.5 years	Es	4	α	23	50	0.0005	Es at 1% strain	[#tumosa_oil_2013]
31.01		Cold-pressed Linseed Oil	Silica with Litharge	8 years	Es	8	α	23	50	0.0005	Es at 1% strain	[#tumosa_oil_2013]
32.01		Cold-pressed Linseed Oil	Lead White	19.5 years	Es	230	α	23	50	0.0005	Es at 1% strain	[#tumosa_oil_2013]
33.01		Cold-pressed Linseed Oil	Lead Carbonate	0.18 years	Es	18	α	23	50	0.0005	Es at 1% strain	[#mecklenberg_influence_2013]
33.02		Cold-pressed Linseed Oil	Lead Carbonate	0.27 years	Es	31	α	23	50	0.0005	Es at 1% strain	[#mecklenberg_influence_2013]
33.03		Cold-pressed Linseed Oil	Lead Carbonate	0.98 years	Es	60	α	23	50	0.0005	Es at 1% strain	[#mecklenberg_influence_2013]
33.04		Cold-pressed Linseed Oil	Lead Carbonate	10 years	Es	100	α	23	50	0.0005	Es at 1% strain	[#mecklenberg_influence_2013]
33.05		Cold-pressed Linseed Oil	Lead Carbonate	14.25 years	Es	150	α	23	50	0.0005	Es at 1% strain	[#mecklenberg_influence_2013]
33.06		Cold-pressed Linseed Oil	Lead Carbonate	18.75 years	Es	230	α	23	50	0.0005	Es at 1% strain	[#mecklenberg_influence_2013]
33.07		Cold-pressed Linseed Oil	Lead Carbonate	19.5 years	Es	250	α	23	50	0.0005	Es at 1% strain	[#mecklenberg_influence_2013]
33.08		Cold-pressed Linseed Oil	Lead Carbonate	19.5 years	Es	240	α	23	50	0.0005	Es at 1% strain; immersed in water 30 sec, dried 1 month	[#mecklenberg_influence_2013]
33.09		Cold-pressed Linseed Oil	Lead Carbonate	19.5 years	Es	230	α	23	50	0.0005	Es at 1% strain; immersed in methanol 30 sec, dried 1 month	[#mecklenberg_influence_2013]
33.1		Cold-pressed Linseed Oil	Lead Carbonate	19.5 years	Es	220	α	23	50	0.0005	Es at 1% strain; immersed in toluene 30 sec, dried 1 month	[#mecklenberg_influence_2013]
33.11		Cold-pressed Linseed Oil	Lead Carbonate	19.5 years	Es	190	α	23	50	0.0005	Es at 1% strain; immersed in acetone 30 sec, dried 1 month	[#mecklenberg_influence_2013]
33.12		Cold-pressed Linseed Oil	Lead Carbonate	19.5 years	Es	170	α	23	50	0.0005	Es at 1% strain; immersed in mineral spirits 60 sec, dried 1 month	[#mecklenberg_influence_2013]
34.01		Cold-pressed Linseed Oil	Lead Tin Yellow	7.5 years	Es	300	α	23	50	0.0005	Es at 1% strain	[#mecklenberg_influence_2013]
35.01		Cold-pressed Linseed Oil	Lead Carbonate with Litharge	16.7 years	Es	290	α	23	50	0.0005	Es at 1% strain	[#mecklenberg_influence_2013]
36.01		Cold-pressed Linseed Oil	Chrome Yellow	7.5 years	Es	40	α	23	50	0.0005	Es at 1% strain	[#mecklenberg_influence_2013]
37.01		Cold-pressed Linseed Oil	Naples Yellow	7.5 years	Es	3	α	23	50	0.0005	Es at 1% strain	[#mecklenberg_influence_2013]
38.01		Cold-pressed Linseed Oil	Titanium Dioxide (rutile)	8.4 years	Es	110	α	23	50	0.0005	Es at 0.25% strain	[#mecklenberg_influence_2013]
38.02		Cold-pressed Linseed Oil	Titanium Dioxide (rutile)	17.2 years	Es	130	α	23	50	0.0005	Es at 0.25% strain	[#mecklenberg_influence_2013]
39.01		Cold-pressed Linseed Oil	Zinc Oxide	8 years	Es	610	α	23	50	0.0005	Es at 0.25% strain	[#mecklenberg_influence_2013]
39.02		Cold-pressed Linseed Oil	Zinc Oxide	14.5 years	Es	1320	α	23	50	0.0005	Es at 0.25% strain	[#mecklenberg_influence_2013]
40.01		Cold-pressed Linseed Oil	Raw Sienna	1.25 years	Es	12	α	23	50	0.0005	Es at 1% strain	[#mecklenberg_influence_2013]
40.02		Cold-pressed Linseed Oil	Raw Sienna	8 years	Es	0	α	23	50	0.0005	Es at 1% strain	[#mecklenberg_influence_2013]
40.03		Cold-pressed Linseed Oil	Raw Sienna	14.25 years	Es	3	α	23	50	0.0005	Es at 1% strain	[#mecklenberg_influence_2013]
41.01		Cold-pressed Linseed Oil	Burnt Sienna	1.25 years	Es	50	α	23	50	0.0005	Es at 1% strain	[#mecklenberg_influence_2013]
41.02		Cold-pressed Linseed Oil	Burnt Sienna	8.5 years	Es	3	α	23	50	0.0005	Es at 1% strain	[#mecklenberg_influence_2013]
42.01		Cold-pressed Linseed Oil	Raw Umber	7.5 years	Es	36	α	23	50	0.0005	Es at 0.5% strain	[#mecklenberg_influence_2013]
42.02		Cold-pressed Linseed Oil	Raw Umber	14 years	Es	6	α	23	50	0.0005	Es at 0.5% strain	[#mecklenberg_influence_2013]
43.01		Cold-pressed Linseed Oil	Burnt Umber	1.25 years	Es	8	α	23	50	0.0005	Es at 0.5% strain	[#mecklenberg_influence_2013]
43.02		Cold-pressed Linseed Oil	Burnt Umber	7.5 years	Es	0	α	23	50	0.0005	Es at 0.5% strain	[#mecklenberg_influence_2013]
44.01		Cold-pressed Linseed Oil; Grumbacher (alkali-refined linseed oil)	Yellow Ocher; Flake White	2.5 years	Es	200	α	23	50	0.0005	Es at 1% strain; Mixture 4:1 volume ratio LO:Grumbacher	[#mecklenberg_influence_2013]
44.02		Cold-pressed Linseed Oil; Grumbacher (alkali-refined linseed oil)	Yellow Ocher; Flake White	2.5 years	Es	230	α	23	50	0.0005	Es at 1% strain; Mixture 4:1 volume ratio LO:Grumbacher; Immersed in acetone 30 sec and dried	[#mecklenberg_influence_2013]
44.03		Cold-pressed Linseed Oil; Grumbacher (alkali-refined linseed oil)	Yellow Ocher; Flake White	2.5 years	Es	240	α	23	50	0.0005	Es at 1% strain; Mixture 4:1 volume ratio LO:Grumbacher; Immersed in methanol 30 sec and dried	[#mecklenberg_influence_2013]
45.01		Winsor & Newton	Yellow Ocher	30 years	Es	40	α	23	50	0.0005	Es at 1% strain	[#mecklenberg_influence_2013]
46.01		Speedball	Yellow Ocher	29 years	Es	0	α	23	50	0.0005	Es at 1% strain	[#mecklenberg_influence_2013]
47.01		Cold-Pressed Linseed Oil	Yellow Ocher	18 years	Es	0	α	23	50	0.0005	Es at 1% strain	[#mecklenberg_influence_2013]
48.01		Gamblin Artists Oil Colors	Raw Umber	15 years	Es	7	α	23	50	0.0005	Es measured at 1% strain	[#fuster-lopez_study_2016]
49.01		Grumbacher Pretested Artists Oil Colors	Raw Umber	15 years	Es	20	α	23	50	0.0005	Es measured at 1% strain	[#fuster-lopez_study_2016]
50.01		Gamblin Artists Oil Colors	Burnt Umber	15 years	Es	22	α	23	50	0.0005	Es measured at 1% strain	[#fuster-lopez_study_2016]
51.01		Grumbacher Pretested Artists Oil Colors	Burnt Umber	15 years	Es	47	α	23	50	0.0005	Es measured at 1% strain	[#fuster-lopez_study_2016]
52.01		Speedball	Burnt Umber	33 years	Es	32	α	23	50	0.0005	Es measured at 1% strain	[#fuster-lopez_study_2016]
53.01		Winsor & Newton Titanium White (professional series): Safflower Oil	TiO2/ZnO	6 years	Es	3420	α	-10	50	0.02	Es measured at 0.5% strain	[#hagan_thermo-mechanical_2017]
53.02		Winsor & Newton Titanium White (professional series): Safflower Oil	TiO2/ZnO	6 years	Es	2830	α	-10	50	0.002	Es measured at 0.5% strain	[#hagan_thermo-mechanical_2017]
53.03		Winsor & Newton Titanium White (professional series): Safflower Oil	TiO2/ZnO	6 years	Es	2100	α	-10	50	0.0002	Es measured at 0.5% strain	[#hagan_thermo-mechanical_2017]
53.04		Winsor & Newton Titanium White (professional series): Safflower Oil	TiO2/ZnO	6 years	Es	1720	α	-10	50	2e-05	Es measured at 0.5% strain	[#hagan_thermo-mechanical_2017]
53.05		Winsor & Newton Titanium White (professional series): Safflower Oil	TiO2/ZnO	6 years	Es	1440	α	10	50	0.02	Es measured at 0.5% strain	[#hagan_thermo-mechanical_2017]
53.06		Winsor & Newton Titanium White (professional series): Safflower Oil	TiO2/ZnO	6 years	Es	1310	α	10	50	0.02	Es measured at 0.5% strain	[#hagan_thermo-mechanical_2017]
53.07		Winsor & Newton Titanium White (professional series): Safflower Oil	TiO2/ZnO	6 years	Es	900	α	20	50	0.002	Es measured at 0.5% strain	[#hagan_thermo-mechanical_2017]
53.08		Winsor & Newton Titanium White (professional series): Safflower Oil	TiO2/ZnO	6 years	Es	870	α	10	50	0.0002	Es measured at 0.5% strain	[#hagan_thermo-mechanical_2017]
53.09		Winsor & Newton Titanium White (professional series): Safflower Oil	TiO2/ZnO	6 years	Es	650	α	20	50	0.0002	Es measured at 0.5% strain	[#hagan_thermo-mechanical_2017]
53.1		Winsor & Newton Titanium White (professional series): Safflower Oil	TiO2/ZnO	6 years	Es	650	α	10	50	2e-05	Es measured at 0.5% strain	[#hagan_thermo-mechanical_2017]
53.11		Winsor & Newton Titanium White (professional series): Safflower Oil	TiO2/ZnO	6 years	Es	470	α	20	50	2e-05	Es measured at 0.5% strain	[#hagan_thermo-mechanical_2017]
54.01		Winsor & Newton Zinc White (professional series): Safflower Oil	ZnO	6-10 years	Es	1890	α	0	50	0.02	Es measured at 0.5% strain	[#hagan_thermo-mechanical_2017]
54.02		Winsor & Newton Zinc White (professional series): Safflower Oil	ZnO	6-10 years	Es	1600	α	-10	50	2e-05	Es measured at 0.5% strain	[#hagan_thermo-mechanical_2017]
54.03		Winsor & Newton Zinc White (professional series): Safflower Oil	ZnO	6-10 years	Es	1380	α	0	50	0.002	Es measured at 0.5% strain	[#hagan_thermo-mechanical_2017]
54.04		Winsor & Newton Zinc White (professional series): Safflower Oil	ZnO	6-10 years	Es	1180	α	10	50	0.02	Es measured at 0.5% strain	[#hagan_thermo-mechanical_2017]
54.05		Winsor & Newton Zinc White (professional series): Safflower Oil	ZnO	6-10 years	Es	1060	α	0	50	0.0002	Es measured at 0.5% strain	[#hagan_thermo-mechanical_2017]
54.06		Winsor & Newton Zinc White (professional series): Safflower Oil	ZnO	6-10 years	Es	890	α	10	50	0.002	Es measured at 0.5% strain	[#hagan_thermo-mechanical_2017]
54.07		Winsor & Newton Zinc White (professional series): Safflower Oil	ZnO	6-10 years	Es	760	α	0	50	2e-05	Es measured at 0.5% strain	[#hagan_thermo-mechanical_2017]
54.08		Winsor & Newton Zinc White (professional series): Safflower Oil	ZnO	6-10 years	Es	720	α	10	50	0.0002	Es measured at 0.5% strain	[#hagan_thermo-mechanical_2017]
54.09		Winsor & Newton Zinc White (professional series): Safflower Oil	ZnO	6-10 years	Es	520	α	10	50	2e-05	Es measured at 0.5% strain	[#hagan_thermo-mechanical_2017]
55.01		Michael Harding Zinc White: Cold-Pressed Linseed Oil	ZnO	6-10 years	Es	2180	α	0	50	0.02	Es measured at 0.5% strain	[#hagan_thermo-mechanical_2017]
55.02		Michael Harding Zinc White: Cold-Pressed Linseed Oil	ZnO	6-10 years	Es	1720	α	0	50	0.002	Es measured at 0.5% strain	[#hagan_thermo-mechanical_2017]
55.03		Michael Harding Zinc White: Cold-Pressed Linseed Oil	ZnO	6-10 years	Es	1590	α	10	50	0.02	Es measured at 0.5% strain	[#hagan_thermo-mechanical_2017]
55.04		Michael Harding Zinc White: Cold-Pressed Linseed Oil	ZnO	6-10 years	Es	1280	α	0	50	0.0002	Es measured at 0.5% strain	[#hagan_thermo-mechanical_2017]
55.05		Michael Harding Zinc White: Cold-Pressed Linseed Oil	ZnO	6-10 years	Es	1110	α	10	50	0.002	Es measured at 0.5% strain	[#hagan_thermo-mechanical_2017]
55.06		Michael Harding Zinc White: Cold-Pressed Linseed Oil	ZnO	6-10 years	Es	990	α	20	50	0.02	Es measured at 0.5% strain	[#hagan_thermo-mechanical_2017]
55.07		Michael Harding Zinc White: Cold-Pressed Linseed Oil	ZnO	6-10 years	Es	880	α	10	50	0.0002	Es measured at 0.5% strain	[#hagan_thermo-mechanical_2017]
55.08		Michael Harding Zinc White: Cold-Pressed Linseed Oil	ZnO	6-10 years	Es	780	α	20	50	0.002	Es measured at 0.5% strain	[#hagan_thermo-mechanical_2017]
55.09		Michael Harding Zinc White: Cold-Pressed Linseed Oil	ZnO	6-10 years	Es	620	α	10	50	2e-05	Es measured at 0.5% strain	[#hagan_thermo-mechanical_2017]
55.1		Michael Harding Zinc White: Cold-Pressed Linseed Oil	ZnO	6-10 years	Es	590	α	20	50	0.0002	Es measured at 0.5% strain	[#hagan_thermo-mechanical_2017]
55.11		Michael Harding Zinc White: Cold-Pressed Linseed Oil	ZnO	6-10 years	Es	440	α	20	50	2e-05	Es measured at 0.5% strain	[#hagan_thermo-mechanical_2017]
56.01		Michael Harding Flake White: Refined Linseed Oil	Basic PbCO3/ZnO	6-10 years	Es	1440	α	10	50	0.02	Es measured at 0.5% strain	[#hagan_thermo-mechanical_2017]
56.02		Michael Harding Flake White: Refined Linseed Oil	Basic PbCO3/ZnO	6-10 years	Es	1160	α	10	50	0.002	Es measured at 0.5% strain	[#hagan_thermo-mechanical_2017]
56.03		Michael Harding Flake White: Refined Linseed Oil	Basic PbCO3/ZnO	6-10 years	Es	940	α	20	50	0.02	Es measured at 0.5% strain	[#hagan_thermo-mechanical_2017]
56.04		Michael Harding Flake White: Refined Linseed Oil	Basic PbCO3/ZnO	6-10 years	Es	670	α	20	50	0.002	Es measured at 0.5% strain	[#hagan_thermo-mechanical_2017]
56.05		Michael Harding Flake White: Refined Linseed Oil	Basic PbCO3/ZnO	6-10 years	Es	610	α	10	50	2e-05	Es measured at 0.5% strain	[#hagan_thermo-mechanical_2017]
56.06		Michael Harding Flake White: Refined Linseed Oil	Basic PbCO3/ZnO	6-10 years	Es	550	α	20	50	0.0002	Es measured at 0.5% strain	[#hagan_thermo-mechanical_2017]
56.07		Michael Harding Flake White: Refined Linseed Oil	Basic PbCO3/ZnO	6-10 years	Es	390	α	20	50	2e-05	Es measured at 0.5% strain	[#hagan_thermo-mechanical_2017]
57.01		Winsor & Newton Artisan Titanium White: Drying oil/additives	TiO2	6-10 years	Es	1080	α	-10	50	0.02	Es measured at 0.5% strain	[#hagan_thermo-mechanical_2017]
57.02		Winsor & Newton Artisan Titanium White: Drying oil/additives	TiO2	6-10 years	Es	690	α	-10	50	0.002	Es measured at 0.5% strain	[#hagan_thermo-mechanical_2017]
57.03		Winsor & Newton Artisan Titanium White: Drying oil/additives	TiO2	6-10 years	Es	440	α	-10	50	0.0002	Es measured at 0.5% strain	[#hagan_thermo-mechanical_2017]
57.04		Winsor & Newton Artisan Titanium White: Drying oil/additives	TiO2	6-10 years	Es	320	α	0	50	0.002	Es measured at 0.5% strain	[#hagan_thermo-mechanical_2017]
57.05		Winsor & Newton Artisan Titanium White: Drying oil/additives	TiO2	6-10 years	Es	310	α	10	50	0.02	Es measured at 0.5% strain	[#hagan_thermo-mechanical_2017]
57.06		Winsor & Newton Artisan Titanium White: Drying oil/additives	TiO2	6-10 years	Es	260	α	-10	50	2e-05	Es measured at 0.5% strain	[#hagan_thermo-mechanical_2017]
57.07		Winsor & Newton Artisan Titanium White: Drying oil/additives	TiO2	6-10 years	Es	200	α	10	50	0.002	Es measured at 0.5% strain	[#hagan_thermo-mechanical_2017]
57.08		Winsor & Newton Artisan Titanium White: Drying oil/additives	TiO2	6-10 years	Es	190	α	20	50	0.02	Es measured at 0.5% strain	[#hagan_thermo-mechanical_2017]
57.09		Winsor & Newton Artisan Titanium White: Drying oil/additives	TiO2	6-10 years	Es	130	α	10	50	0.0002	Es measured at 0.5% strain	[#hagan_thermo-mechanical_2017]
57.1		Winsor & Newton Artisan Titanium White: Drying oil/additives	TiO2	6-10 years	Es	120	α	20	50	0.002	Es measured at 0.5% strain	[#hagan_thermo-mechanical_2017]
57.11		Winsor & Newton Artisan Titanium White: Drying oil/additives	TiO2	6-10 years	Es	80	α	10	50	2e-05	Es measured at 0.5% strain	[#hagan_thermo-mechanical_2017]
57.12		Winsor & Newton Artisan Titanium White: Drying oil/additives	TiO2	6-10 years	Es	70	α	20	50	0.0002	Es measured at 0.5% strain	[#hagan_thermo-mechanical_2017]
57.13		Winsor & Newton Artisan Titanium White: Drying oil/additives	TiO2	6-10 years	Es	40	α	20	50	2e-05	Es measured at 0.5% strain	[#hagan_thermo-mechanical_2017]
68.01		Cold Pressed Linseed Oil	Lead Tin Yellow	1.25 years	Es	170	α	23	50		Es measured at 1% strain	[#fuster-lopez_look_2017]
68.02		Cold Pressed Linseed Oil	Lead Tin Yellow	7.85 years	Es	600	α	23	15		Es measured at 1% strain	[#fuster-lopez_look_2017]
68.03		Cold Pressed Linseed Oil	Lead Tin Yellow	7.5 years	Es	300	α	23	49		Es measured at 1% strain	[#fuster-lopez_look_2017]
68.04		Cold Pressed Linseed Oil	Lead Tin Yellow	7.85 years	Es	160	α	23	83		Es measured at 1% strain	[#fuster-lopez_look_2017]
69.01		Cold Pressed Linseed Oil	Red Iron Oxide	1.25 years	Es	11	α	23	50		Es measured at 1% strain	[#fuster-lopez_look_2017]
69.02		Cold Pressed Linseed Oil	Red Iron Oxide	7.85 years	Es	7	α	23	16		Es measured at 1% strain	[#fuster-lopez_look_2017]
69.03		Cold Pressed Linseed Oil	Red Iron Oxide	7.5 years	Es	3	α	23	48		Es measured at 1% strain	[#fuster-lopez_look_2017]
69.04		Cold Pressed Linseed Oil	Red Iron Oxide	7.85 years	Es	1	α	23	84		Es measured at 1% strain	[#fuster-lopez_look_2017]
70.01		Grumbacher Artists Oil Colors; Alkali Refined Linseed Oil	Cobalt Blue, PB28	2 years	Es	0.29	α	23	50	0.0625	Es measured at 1% strain; this value is also similar to the σT	[#fuster-lopez_insight_2019]
70.02		Grumbacher Artists Oil Colors (Alkali Refined Linseed Oil)	Cobalt Blue, PB28	18 years	E	9	α	23	50	0.0625	E measured for linear elastic region.	[#fuster-lopez_insight_2019]
70.02		Grumbacher Artists Oil Colors (Alkali Refined Linseed Oil)	Cobalt Blue, PB28	18 years	σT	0.3	α	23	50	0.0625	σT measured at maximum stress of the curve.	[#fuster-lopez_insight_2019]
71.01		Gamblin Artists Oil Colors (Alkali Refined Linseed Oil)	Cobalt Blue, PB28	2 years	Es	0.35	α	23	50	0.0625	Es measured at 1% strain; this value is also similar to the σT	[#fuster-lopez_insight_2019]
71.02		Gamblin Artists Oil Colors (Alkali Refined Linseed Oil)	Cobalt Blue, PB28	18 years	E	111	α	23	50	0.0625	E measured for linear elastic region.	[#fuster-lopez_insight_2019]
71.02		Gamblin Artists Oil Colors (Alkali Refined Linseed Oil)	Cobalt Blue, PB28	18 years	σT	0.22	α	23	50	0.0625	σT measured at maximum stress of the curve.	[#fuster-lopez_insight_2019]
72.01		Gamblin Artists Colors (Linseed Oil)	Cobalt Blue, PB28, Litharge	18 years	E	45	α	23	50	0.0625	E measured for linear elastic region.	[#fuster-lopez_insight_2019]
72.01		Gamblin Artists Colors (Linseed Oil)	Cobalt Blue, PB28, Litharge	18 years	σT	0.34	α	23	50	0.0625	σT measured at maximum stress of the curve.	[#fuster-lopez_insight_2019]
73.01		Winsor & Newton Artists' Paint (Linseed/Safflower Oil)	Cobalt blue, PB28	3 years	σT	2.4	α	23	50	0.0625	σT measured at maximum stress of the curve.	[#fuster-lopez_insight_2019]
74.01		Titan Color al oleo extrafino 52	Cobalt blue, PB28, PB29	3 years	σT	1	α	23	50	0.0625	σT measured at maximum stress of the curve.	[#fuster-lopez_insight_2019]
75.01		Talens-Van Gogh Oil Colour 511	Cobalt blue, PB28	3 years	σT	0.69	α	23	50	0.0625	σT measured at maximum stress of the curve.	[#fuster-lopez_insight_2019]
76.01		Cold Pressed Linseed Oil	Cobalt Blue, PB28	3 years	Es	0.3	α	23	50	0.0625	Es measured at 1% strain	[#fuster-lopez_insight_2019]
76.01		Cold Pressed Linseed Oil	Cobalt Blue, PB28	3 years	Es	0.4	α	23	50	0.0625	Es measured at 5% strain	[#fuster-lopez_insight_2019]
77.01		Cold Pressed Linseed Oil	Cobalt Blue, PB28; calcite; gypsum; kaolin	3 years	Es	3.2	α	23	50	0.0625	Es measured at 1% strain	[#fuster-lopez_insight_2019]
77.01		Cold Pressed Linseed Oil	Cobalt Blue, PB28; calcite; gypsum; kaolin	3 years	Es	2	α	23	50	0.0625	Es measured at 5% strain	[#fuster-lopez_insight_2019]
78.01		Cold Pressed Linseed Oil	Cobalt Blue, PB28; calcite; gypsum; kaolin; aluminium stearate	3 years	Es	2.9	α	23	50	0.0625	Es measured at 1% strain	[#fuster-lopez_insight_2019]
78.01		Cold Pressed Linseed Oil	Cobalt Blue, PB28; calcite; gypsum; kaolin; aluminium stearate	3 years	Es	5.2	α	23	50	0.0625	Es measured at 4.9% strain	[#fuster-lopez_insight_2019]
79.01		Cold Pressed Linseed Oil	Cobalt Blue, PB28; calcite; gypsum; kaolin; aluminium stearate; castor wax	3 years	Es	2	α	23	50	0.0625	Es measured at 1% strain	[#fuster-lopez_insight_2019]
79.01		Cold Pressed Linseed Oil	Cobalt Blue, PB28; calcite; gypsum; kaolin; aluminium stearate; castor wax	3 years	Es	3.2	α	23	50	0.0625	Es measured at 5% strain	[#fuster-lopez_insight_2019]
80.01		Cold Pressed Linseed Oil, Safflower Oil, Sunflower Oil	Cobalt Blue, PB28; calcite; gypsum; kaolin; aluminium stearate; castor wax	3 years	Es	1	α	23	50	0.0625	Es measured at 1% strain	[#fuster-lopez_insight_2019]
80.01		Cold Pressed Linseed Oil, Safflower Oil, Sunflower Oil	Cobalt Blue, PB28; calcite; gypsum; kaolin; aluminium stearate; castor wax	3 years	Es	1.3	α	23	50	0.0625	Es measured at 5% strain	[#fuster-lopez_insight_2019]

## Sheet: Alkyd
Sample ID	Support	Binding Medium	Pigment	Aging Time	Type of Mechanical Property	Mechanical Property (MPa)	αEstimated from Graph βEstimated from Stiffness	Temperature (°C)	Relative Humidity	Strain Rate (s^-1)	Other testing conditions	Reference (BibTex)
1.01			Alizarine Crimson	10+ years	E	758		23	50		Strain rates from this reference ranged from 0.001-0.01 s-1.	[#erlebacher_effects_1992]
1.02			Alizarine Crimson	10 + years	E	1257		23	5		Strain rates from this reference ranged from 0.001-0.01 s-1.	[#erlebacher_effects_1992]
1.03			Alizarine Crimson	10 + years	E	4540		-5	5		Strain rates from this reference ranged from 0.001-0.01 s-1.	[#erlebacher_effects_1992]
2.01			Burnt Umber	10+ years	E	1990		23	50		Strain rates from this reference ranged from 0.001-0.01 s-1.	[#erlebacher_effects_1992]
2.02			Burnt Umber	10+ years	E	2794		23	5		Strain rates from this reference ranged from 0.001-0.01 s-1.	[#erlebacher_effects_1992]
3.01			Cadmium Yellow	10+ years	E	1327		23	50		Strain rates from this reference ranged from 0.001-0.01 s-1.	[#erlebacher_effects_1992]
3.02			Cadmium Yellow	10+ years	E	2968		23	5		Strain rates from this reference ranged from 0.001-0.01 s-1.	[#erlebacher_effects_1992]
4.01			Iron Oxide Red	10+ years	E	1152		23	50		Strain rates from this reference ranged from 0.001-0.01 s-1.	[#erlebacher_effects_1992]
4.02			Iron Oxide Red	10+ years	E	2095		23	5		Strain rates from this reference ranged from 0.001-0.01 s-1.	[#erlebacher_effects_1992]
4.03			Iron Oxide Red	10+ years	E	9079		-5	5		Strain rates from this reference ranged from 0.001-0.01 s-1.	[#erlebacher_effects_1992]
5.01			Ivory Black	10+ years	E	559		23	50		Strain rates from this reference ranged from 0.001-0.01 s-1.	[#erlebacher_effects_1992]
5.02			Ivory Black	10+ years	E	1257		23	5		Strain rates from this reference ranged from 0.001-0.01 s-1.	[#erlebacher_effects_1992]
6.01			Lead White	10+ years	E	4190		23	50		Strain rates from this reference ranged from 0.001-0.01 s-1.	[#erlebacher_effects_1992]
6.02			Lead White	10+ years	E	5936		23	5		Strain rates from this reference ranged from 0.001-0.01 s-1.	[#erlebacher_effects_1992]
6.03			Lead White	10+ years	E	8730		-5	5		Strain rates from this reference ranged from 0.001-0.01 s-1.	[#erlebacher_effects_1992]
7.01			Titanium White	10+ years	E	1921		23	50		Strain rates from this reference ranged from 0.001-0.01 s-1.	[#erlebacher_effects_1992]
7.02			Titanium White	10+ years	E	4400		23	5		Strain rates from this reference ranged from 0.001-0.01 s-1.	[#erlebacher_effects_1992]
8.01			Yellow Ochre	10+ years	E	978		23	50		Strain rates from this reference ranged from 0.001-0.01 s-1.	[#erlebacher_effects_1992]
8.02			Yellow Ochre	10+ years	E	2095		23	5		Strain rates from this reference ranged from 0.001-0.01 s-1.	[#erlebacher_effects_1992]
9.01		Alkyd Emulsion (URADIL AZ554 Z-50)	Cobalt drier	3 days	E	8.2	α				Ambient Conditions, Load Relaxation, Film Thickness: 0.4 mm	[#mirone_elastic_2004]
10.01		Alkyd Emulsion (URADIL AZ554 Z-50)	Cobalt drier	3 days	E	7.4	α				Ambient Conditions, Load Relaxation, Film Thickness: 0.7 mm	[#mirone_elastic_2004]
11.01		Alkyd Emulsion (URADIL AZ554 Z-50)	Cobalt drier	3 days	E	7.0	α				Ambient Conditions, Load Relaxation, Film Thickness: 1 mm	[#mirone_elastic_2004]
12.01		Alkyd Emulsion (URADIL AZ554 Z-50)	Cobalt drier	3 days	E	5.6	α				Ambient Conditions, Load Relaxation, Film Thickness: 1.4 mm	[#mirone_elastic_2004]
9.02		Alkyd Emulsion (URADIL AZ554 Z-50)	Cobalt drier	11 days	E	21.0	α				Ambient Conditions, Load Relaxation, Film Thickness: 0.4 mm	[#mirone_elastic_2004]
10.02		Alkyd Emulsion (URADIL AZ554 Z-50)	Cobalt drier	11 days	E	17.2	α				Ambient Conditions, Load Relaxation, Film Thickness: 0.7 mm	[#mirone_elastic_2004]
11.02		Alkyd Emulsion (URADIL AZ554 Z-50)	Cobalt drier	11 days	E	14.5	α				Ambient Conditions, Load Relaxation, Film Thickness: 1 mm	[#mirone_elastic_2004]
12.02		Alkyd Emulsion (URADIL AZ554 Z-50)	Cobalt drier	11 days	E	10.4	α				Ambient Conditions, Load Relaxation, Film Thickness: 1.4 mm	[#mirone_elastic_2004]
9.03		Alkyd Emulsion (URADIL AZ554 Z-50)	Cobalt drier	19 days	E	31.4	α				Ambient Conditions, Load Relaxation, Film Thickness: 0.4 mm	[#mirone_elastic_2004]
10.03		Alkyd Emulsion (URADIL AZ554 Z-50)	Cobalt drier	19 days	E	25.1	α				Ambient Conditions, Load Relaxation, Film Thickness: 0.7 mm	[#mirone_elastic_2004]
11.03		Alkyd Emulsion (URADIL AZ554 Z-50)	Cobalt drier	19 days	E	19.7	α				Ambient Conditions, Load Relaxation, Film Thickness: 1 mm	[#mirone_elastic_2004]
12.03		Alkyd Emulsion (URADIL AZ554 Z-50)	Cobalt drier	19 days	E	13.7	α				Ambient Conditions, Load Relaxation, Film Thickness: 1.4 mm	[#mirone_elastic_2004]
13.01		Alkyd Emulsion (URADIL AZ554 Z-50)	Cobalt drier	30 days	E	36.0	α				Ambient Conditions, Load Relaxation, Film Thickness: 0.2 mm	[#mirone_elastic_2004]
9.04		Alkyd Emulsion (URADIL AZ554 Z-50)	Cobalt drier	30 days	E	35.5	α				Ambient Conditions, Load Relaxation, Film Thickness: 0.4 mm	[#mirone_elastic_2004]
10.04		Alkyd Emulsion (URADIL AZ554 Z-50)	Cobalt drier	30 days	E	29.6	α				Ambient Conditions, Load Relaxation, Film Thickness: 0.7 mm	[#mirone_elastic_2004]
11.04		Alkyd Emulsion (URADIL AZ554 Z-50)	Cobalt drier	30 days	E	23.7	α				Ambient Conditions, Load Relaxation, Film Thickness: 1 mm	[#mirone_elastic_2004]
14.01		Alkyd Emulsion (URADIL AZ554 Z-50)	Cobalt drier	30 days	E	18.3	α				Ambient Conditions, Load Relaxation, Film Thickness: 1.2 mm	[#mirone_elastic_2004]
15.01		Dulux: Nondrip Gloss - Pure Brilliant White		3 months	σT	9.2	α	21	50	0.002		[#hagan_factors_2007]
16.01		Dulus Trade: High Gloss - Pure Brilliant White		3 months	σT	6.6	α	21	50	0.002		[#hagan_factors_2007]
17.01		Crown: Nondrip Gloss - Pure Brilliant White		3 months	σT	6.5	α	21	50	0.002		[#hagan_factors_2007]
18.01		Griffin (Windsor & Newton)	Titanium White	3 months	σT	5	α	21	50	0.002		[#hagan_factors_2007]
19.01	Golden Acrylic Gesso Primer	Winsor & Newton Griffin	Cadmium Sulfoselenide	6 days ambient, 94 days thermal aging	Es	0.36		20	55	0.001	2-layer system; Thermal aging: 60°C/55% RH, Es at 0.5% strain	[#young_interfacial_2007]
19.02	Golden Acrylic Gesso Primer	Winsor & Newton Griffin	Cadmium Sulfoselenide	6 days ambient, 94 days thermal aging	Es	0.15		20	55	0.001	2-layer system; Thermal aging: 60°C/55% RH, Es at 5.0% strain	[#young_interfacial_2007]
19.03	Golden Acrylic Gesso Primer	Winsor & Newton Griffin	Cadmium Sulfoselenide	6 days ambient, 0 days thermal aging	Es	0.21		20	55	0.001	2-layer system; Thermal aging: 60°C/55% RH, Es at 0.5% strain	[#young_interfacial_2007]
19.04	Golden Acrylic Gesso Primer	Winsor & Newton Griffin	Cadmium Sulfoselenide	6 days ambient, 0 days thermal aging	Es	0.08		20	55	0.001	2-layer system; Thermal aging: 60°C/55% RH, Es at 5.0% strain	[#young_interfacial_2007]
20.01	Roberson Acrylic Primer	Winsor & Newton Griffin	Cadmium Sulfoselenide	6 days ambient, 94 days thermal aging	Es	0.08		20	55	0.001	2-layer system; Thermal aging: 60°C/55% RH, Es at 0.5% strain	[#young_interfacial_2007]
20.02	Roberson Acrylic Primer	Winsor & Newton Griffin	Cadmium Sulfoselenide	6 days ambient, 94 days thermal aging	Es	0.11		20	55	0.001	2-layer system; Thermal aging: 60°C/55% RH, Es at 5.0% strain	[#young_interfacial_2007]
20.03	Roberson Acrylic Primer	Winsor & Newton Griffin	Cadmium Sulfoselenide	6 days ambient, 0 days thermal aging	Es	0.08		20	55	0.001	2-layer system; Thermal aging: 60°C/55% RH, Es at 0.5% strain	[#young_interfacial_2007]
20.04	Roberson Acrylic Primer	Winsor & Newton Griffin	Cadmium Sulfoselenide	6 days ambient, 0 days thermal aging	Es	0.09		20	55	0.001	2-layer system; Thermal aging: 60°C/55% RH, Es at 5.0% strain	[#young_interfacial_2007]
21.01	Winsor & Newton Alkyd Primer	Winsor & Newton Griffin	Cadmium Sulfoselenide	6 days ambient, 64 days thermal aging	Es	1.06		20	55	0.001	2-layer system; Thermal aging: 60°C/55% RH, Es at 0.5% strain	[#young_interfacial_2007]
21.02	Winsor & Newton Alkyd Primer	Winsor & Newton Griffin	Cadmium Sulfoselenide	6 days ambient, 0 days thermal aging	Es	0.24		20	55	0.001	2-layer system; Thermal aging: 60°C/55% RH, Es at 0.5% strain	[#young_interfacial_2007]
21.03	Winsor & Newton Alkyd Primer	Winsor & Newton Griffin	Cadmium Sulfoselenide	6 days ambient, 0 days thermal aging	Es	0.17		20	55	0.001	2-layer system; Thermal aging: 60°C/55% RH, Es at 5.0% strain	[#young_interfacial_2007]
22.01	Spectrum Alkyd Primer	Winsor & Newton Griffin	Cadmium Sulfoselenide	6 days ambient, 94 days thermal aging	Es	0.07		20	55	0.001	2-layer system; Thermal aging: 60°C/55% RH, Es at 0.5% strain	[#young_interfacial_2007]
22.02	Spectrum Alkyd Primer	Winsor & Newton Griffin	Cadmium Sulfoselenide	6 days ambient, 94 days thermal aging	Es	0.18		20	55	0.001	2-layer system; Thermal aging: 60°C/55% RH, Es at 5.0% strain	[#young_interfacial_2007]
22.03	Spectrum Alkyd Primer	Winsor & Newton Griffin	Cadmium Sulfoselenide	6 days ambient, 0 days thermal aging	Es	0.05		20	55	0.001	2-layer system; Thermal aging: 60°C/55% RH, Es at 0.5% strain	[#young_interfacial_2007]
22.04	Spectrum Alkyd Primer	Winsor & Newton Griffin	Cadmium Sulfoselenide	6 days ambient, 0 days thermal aging	Es	0.01		20	55	0.001	2-layer system; Thermal aging: 60°C/55% RH, Es at 5.0% strain	[#young_interfacial_2007]
23.01		Winsor & Newton Alkyd Primer		7 months	E	6340		-10	55	0.002		[#young_cold_2008]
23.02		Winsor & Newton Alkyd Primer		7 months	E	6020		0	60	0.002		[#young_cold_2008]
23.03		Winsor & Newton Alkyd Primer		7 months	E	4350		10	57	0.002		[#young_cold_2008]
23.04		Winsor & Newton Alkyd Primer		7 months	E	2720		20	54	0.002		[#young_cold_2008]
24.01		Spectrum Primer		7 months	E	4570		-10	55	0.002		[#young_cold_2008]
24.02		Spectrum Primer		7 months	E	3240		0	60	0.002		[#young_cold_2008]
24.03		Spectrum Primer		7 months	E	2170		10	57	0.002		[#young_cold_2008]
24.04		Spectrum Primer		7 months	E	1080		20	54	0.002		[#young_cold_2008]
25.01		Roberson Primer		7 months	E	6060		-10	55	0.002		[#young_cold_2008]
25.02		Roberson Primer		7 months	E	3740		0	60	0.002		[#young_cold_2008]
25.03		Roberson Primer		7 months	E	2760		10	57	0.002		[#young_cold_2008]
25.04		Roberson Primer		7 months	E	990		20	54	0.002		[#young_cold_2008]
26.01		Winsor & Newton Griffin	Alizarin Red	5 months	Es	4	α				Ambient Conditions, Es at 1% strain	[#fuesers_influence_2008]
27.01		Winsor & Newton Griffin	Phthalocyanine Blue	5 months	Es	12	α				Ambient Conditions, Es at 1% strain	[#fuesers_influence_2008]
28.01		Winsor & Newton Griffin	Ivory Black	5 months	Es	42	α				Ambient Conditions, Es at 1% strain	[#fuesers_influence_2008]
29.01		Winsor & Newton Griffin	Titanium White	5 months	Es	270	α				Ambient Conditions, Es at 1% strain	[#fuesers_influence_2008]
30.01		Winsor & Newton Griffin	Hansa Yellow	5 months	Es	7	α				Ambient Conditions, Es at 1% strain	[#fuesers_influence_2008]
30.02		Winsor & Newton Griffin	Hansa Yellow	5 months	Es	8	α				Ambient Conditions, Es at 1% strain, Immersed in water 1 min, Dried 4 weeks	[#fuesers_influence_2008]
30.03		Winsor & Newton Griffin	Hansa Yellow	5 months	Es	12	α				Ambient Conditions, Es at 1% strain, Immersed in n-hexane 1 min, Dried 4 weeks	[#fuesers_influence_2008]
30.04		Winsor & Newton Griffin	Hansa Yellow	5 months	Es	9	α				Ambient Conditions, Es at 1% strain, Immersed in ethanol 1 min, Dried 4 weeks	[#fuesers_influence_2008]
30.05		Winsor & Newton Griffin	Hansa Yellow	5 months	Es	15	α				Ambient Conditions, Es at 1% strain, Immersed in toluene 1 min, Dried 4 weeks	[#fuesers_influence_2008]
30.06		Winsor & Newton Griffin	Hansa Yellow	5 months	Es	21	α				Ambient Conditions, Es at 1% strain, Immersed in diethyl ether 1 min, Dried 4 weeks	[#fuesers_influence_2008]
30.07		Winsor & Newton Griffin	Hansa Yellow	5 months	Es	13	α				Ambient Conditions, Es at 1% strain, Immersed in chloroform 1 min, Dried 4 weeks	[#fuesers_influence_2008]
30.08		Winsor & Newton Griffin	Hansa Yellow	5 months	Es	49	α				Ambient Conditions, Es at 1% strain, Immersed in acetone 1 min, Dried 4 weeks	[#fuesers_influence_2008]
31.01		DIY Indoor/Outdoor Alkyd	Alizarin Red	5 months	Es	110	α				Ambient Conditions, Es at 1% strain	[#fuesers_influence_2008]
32.01		DIY Indoor/Outdoor Alkyd	Phthalocyanine Blue	5 months	Es	140	α				Ambient Conditions, Es at 1% strain	[#fuesers_influence_2008]
33.01		DIY Indoor/Outdoor Alkyd	Ivory Black	5 months	Es	190	α				Ambient Conditions, Es at 1% strain	[#fuesers_influence_2008]
34.01		DIY Indoor/Outdoor Alkyd	Titanium White	5 months	Es	270	α				Ambient Conditions, Es at 1% strain	[#fuesers_influence_2008]
35.01		DIY Indoor/Outdoor Alkyd	Hansa Yellow	5 months	Es	120	α				Ambient Conditions, Es at 1% strain	[#fuesers_influence_2008]
35.02		DIY Indoor/Outdoor Alkyd	Hansa Yellow	5 months	Es	105	α				Ambient Conditions, Es at 1% strain, Immersed in water 1 min, Dried 4 weeks	[#fuesers_influence_2008]
35.03		DIY Indoor/Outdoor Alkyd	Hansa Yellow	5 months	Es	108	α				Ambient Conditions, Es at 1% strain, Immersed in n-hexane 1 min, Dried 4 weeks	[#fuesers_influence_2008]
35.04		DIY Indoor/Outdoor Alkyd	Hansa Yellow	5 months	Es	124	α				Ambient Conditions, Es at 1% strain, Immersed in ethanol 1 min, Dried 4 weeks	[#fuesers_influence_2008]
35.05		DIY Indoor/Outdoor Alkyd	Hansa Yellow	5 months	Es	135	α				Ambient Conditions, Es at 1% strain, Immersed in toluene 1 min, Dried 4 weeks	[#fuesers_influence_2008]
35.06		DIY Indoor/Outdoor Alkyd	Hansa Yellow	5 months	Es	119	α				Ambient Conditions, Es at 1% strain, Immersed in diethyl ether 1 min, Dried 4 weeks	[#fuesers_influence_2008]
35.07		DIY Indoor/Outdoor Alkyd	Hansa Yellow	5 months	Es	160	α				Ambient Conditions, Es at 1% strain, Immersed in chloroform 1 min, Dried 4 weeks	[#fuesers_influence_2008]
35.08		DIY Indoor/Outdoor Alkyd	Hansa Yellow	5 months	Es	168	α				Ambient Conditions, Es at 1% strain, Immersed in acetone 1 min, Dried 4 weeks	[#fuesers_influence_2008]
36.01		Winsor & Newton Griffin	Titanium Dioxide	7 years	Es	125	α	23	50	0.0005	Es measured at 0.5% strain	[#mecklenburg_influence_2013]
37.01		Gamblin "Alkyd White"	Zinc Oxide	7 years	Es	580	α	23	50	0.0005	Es measured at 0.5% strain	[#mecklenburg_influence_2013]
38.01		Winsor & Newton Griffin	Cobalt Blue	7 years	Es	75	α	23	50	0.0005	Es measured at 0.5% strain	[#mecklenburg_influence_2013]
39.01		Winsor & Newton	Flake White	29 years	Es	2780	α	23	50	0.0005	Es measured at 0.25% strain	[#mecklenburg_influence_2013]
40.01		Winsor & Newton	Burnt Umber	29 years	Es	1720	α	23	50	0.0005	Es measured at 0.5% strain	[#mecklenburg_influence_2013]
41.01		Winsor & Newton	Titanium White	29 years	Es	980	α	23	50	0.0005	Es measured at 1% strain	[#mecklenburg_influence_2013]
42.01		Winsor & Newton	Alizarin Crimson	20 years	Es	150	α	23	50	0.0005	Es measured at 1% strain	[#mecklenburg_influence_2013]
42.02		Winsor & Newton	Alizarin Crimson	29 years	Es	240	α	23	50	0.0005	Es measured at 1% strain	[#mecklenburg_influence_2013]
42.03		Winsor & Newton	Alizarin Crimson	29 years	Es	260	α	23	50	0.0005	Immersed in Acetone 30 sec and dried, Es measured at 1% strain	[#mecklenburg_influence_2013]
42.04		Winsor & Newton	Alizarin Crimson	29 years	Es	280	α	23	50	0.0005	Immersed in Methanol 30 sec and dried, Es measured at 1% strain	[#mecklenburg_influence_2013]
43.01		Winsor & Newton	Yellow Ochre	29 years	Es	150	α	23	50	0.0005	Es measured at 1% strain	[#mecklenburg_influence_2013]
44.01		Winsor & Newton	Ivory Black	29 years	Es	140	α	23	50	0.0005	Es measured at 1% strain	[#mecklenburg_influence_2013]
45.01		Winsor & Newton Griffin Titanium White: Oil-modified alkyd	TiO2	6-10 years	Es	4850	α	-10	50	0.002	Es measured at 0.5% strain	[#hagan_thermo-mechanical_2017]
45.02		Winsor & Newton Griffin Titanium White: Oil-modified alkyd	TiO2	6-10 years	Es	4480	α	-10	50	0.0002	Es measured at 0.5% strain	[#hagan_thermo-mechanical_2017]
45.03		Winsor & Newton Griffin Titanium White: Oil-modified alkyd	TiO2	6-10 years	Es	4270	α	0	50	0.002	Es measured at 0.5% strain	[#hagan_thermo-mechanical_2017]
45.04		Winsor & Newton Griffin Titanium White: Oil-modified alkyd	TiO2	6-10 years	Es	3350	α	-10	50	0.00002	Es measured at 0.5% strain	[#hagan_thermo-mechanical_2017]
45.05		Winsor & Newton Griffin Titanium White: Oil-modified alkyd	TiO2	6-10 years	Es	3010	α	10	50	0.02	Es measured at 0.5% strain	[#hagan_thermo-mechanical_2017]
45.06		Winsor & Newton Griffin Titanium White: Oil-modified alkyd	TiO2	6-10 years	Es	2560	α	10	50	0.002	Es measured at 0.5% strain	[#hagan_thermo-mechanical_2017]
45.07		Winsor & Newton Griffin Titanium White: Oil-modified alkyd	TiO2	6-10 years	Es	1350	α	20	50	0.02	Es measured at 0.5% strain	[#hagan_thermo-mechanical_2017]
45.08		Winsor & Newton Griffin Titanium White: Oil-modified alkyd	TiO2	6-10 years	Es	1120	α	10	50	0.0002	Es measured at 0.5% strain	[#hagan_thermo-mechanical_2017]
45.09		Winsor & Newton Griffin Titanium White: Oil-modified alkyd	TiO2	6-10 years	Es	790	α	20	50	0.002	Es measured at 0.5% strain	[#hagan_thermo-mechanical_2017]
45.1		Winsor & Newton Griffin Titanium White: Oil-modified alkyd	TiO2	6-10 years	Es	680	α	10	50	0.00002	Es measured at 0.5% strain	[#hagan_thermo-mechanical_2017]
45.11		Winsor & Newton Griffin Titanium White: Oil-modified alkyd	TiO2	6-10 years	Es	410	α	20	50	0.0002	Es measured at 0.5% strain	[#hagan_thermo-mechanical_2017]
46.01		Winsor & Newton Alkyd Paint	Cobalt Blue, PB28	2 years	Es	43	α	23	50	0.0625	Es measured at 1% strain	[#fuster-lopez_insight_2019]
46.02		Winsor & Newton Alkyd Paint	Cobalt Blue, PB28	8 years	Es	140	α	23	50	0.0625	Es measured at 1% strain	[#fuster-lopez_insight_2019]
46.03		Winsor & Newton Alkyd Paint	Cobalt Blue, PB28	19 years	Es	170	α	23	50	0.0625	Es measured at 1% strain	[#fuster-lopez_insight_2019]
47.01		Winsor & Newton Griffin Artists' Alkyd Paint	Cobalt Blue, PB28	8 years	Es	84	α	23	50	0.0625	Es measured at 1% strain	[#fuster-lopez_insight_2019]
47.02		Winsor & Newton Griffin Artists' Alkyd Paint	Cobalt Blue, PB28	19 years	Es	400	α	23	50	0.0625	Es measured at 1% strain	[#fuster-lopez_insight_2019]

## Sheet: Acrylic
Sample ID	Support	Binding Medium/Brand	Pigment	Aging Time	Type of Mechanical Property	Mechanical Property (MPa)	αEstimated from Graph βEstimated from Stiffness	Temperature (°C)	Relative Humidity (%)	Strain Rate (s-1)	Other testing conditions	Reference (BibTex)
1.01			Burnt Sienna	10+ years	E	279		23	50		Strain rates from this reference ranged from 0.001-0.01 s-1.	[#erlebacher_effects_1992]
1.02			Burnt Sienna	10+ years	E	1048		23	5		Strain rates from this reference ranged from 0.001-0.01 s-1.	[#erlebacher_effects_1992]
1.03			Burnt Sienna	10+ years	E	6425		-6.5	5		Strain rates from this reference ranged from 0.001-0.01 s-1.	[#erlebacher_effects_1992]
1.04			Burnt Sienna	10+ years	E	6111		5	5		Strain rates from this reference ranged from 0.001-0.01 s-1.	[#erlebacher_effects_1992]
1.05			Burnt Sienna	13 years	Eeq	62.9		23	50		Stress relaxation	[#mecklenburg_mechanical_1994]
2.01			Burnt Umber	10+ years	E	77		23	50		Strain rates from this reference ranged from 0.001-0.01 s-1.	[#erlebacher_effects_1992]
2.02			Burnt Umber	10+ years	E	349		23	5		Strain rates from this reference ranged from 0.001-0.01 s-1.	[#erlebacher_effects_1992]
2.03			Burnt Umber	10+ years	E	3981		-8.1	50		Strain rates from this reference ranged from 0.001-0.01 s-1.	[#erlebacher_effects_1992]
2.04			Burnt Umber	10+ years	E	1571		5.6	50		Strain rates from this reference ranged from 0.001-0.01 s-1.	[#erlebacher_effects_1992]
2.05			Burnt Umber	10+ years	E	17		33.4	50		Strain rates from this reference ranged from 0.001-0.01 s-1.	[#erlebacher_effects_1992]
3.01			Cadmium Red	10+ years	E	161		23	50		Strain rates from this reference ranged from 0.001-0.01 s-1.	[#erlebacher_effects_1992]
4.01			Cadmium Yellow	10+ years	E	105		23	50		Strain rates from this reference ranged from 0.001-0.01 s-1.	[#erlebacher_effects_1992]
4.02			Cadmium Yellow	10+ years	E	475		23	5		Strain rates from this reference ranged from 0.001-0.01 s-1.	[#erlebacher_effects_1992]
4.03			Cadmium Yellow	10+ years	E	5517		-6.5	5		Strain rates from this reference ranged from 0.001-0.01 s-1.	[#erlebacher_effects_1992]
4.04			Cadmium Yellow	10+ years	E	4470		5	5		Strain rates from this reference ranged from 0.001-0.01 s-1.	[#erlebacher_effects_1992]
5.01			Cerulean Blue	10+ years	E	140		23	50		Strain rates from this reference ranged from 0.001-0.01 s-1.	[#erlebacher_effects_1992]
5.02			Cerulean Blue	10+ years	E	265		23	5		Strain rates from this reference ranged from 0.001-0.01 s-1.	[#erlebacher_effects_1992]
6.01			Cobalt Blue	10+ years	E	314		23	50		Strain rates from this reference ranged from 0.001-0.01 s-1.	[#erlebacher_effects_1992]
6.02			Cobalt Blue	10+ years	E	698		23	5		Strain rates from this reference ranged from 0.001-0.01 s-1.	[#erlebacher_effects_1992]
6.03			Cobalt Blue	10+ years	E	6495		-8.1	50		Strain rates from this reference ranged from 0.001-0.01 s-1.	[#erlebacher_effects_1992]
6.04			Cobalt Blue	10+ years	E	2025		5.6	50		Strain rates from this reference ranged from 0.001-0.01 s-1.	[#erlebacher_effects_1992]
6.05			Cobalt Blue	10+ years	E	23		33.4	50		Strain rates from this reference ranged from 0.001-0.01 s-1.	[#erlebacher_effects_1992]
7.01			Iron Oxide Red	10+ years	E	279		23	50		Strain rates from this reference ranged from 0.001-0.01 s-1.	[#erlebacher_effects_1992]
7.02			Iron Oxide Red	10+ years	E	663		23	5		Strain rates from this reference ranged from 0.001-0.01 s-1.	[#erlebacher_effects_1992]
7.03			Ivory Black	10+ years	E	84		23	50		Strain rates from this reference ranged from 0.001-0.01 s-1.	[#erlebacher_effects_1992]
7.04			Ivory Black	10+ years	E	279		23	5		Strain rates from this reference ranged from 0.001-0.01 s-1.	[#erlebacher_effects_1992]
7.05			Ivory Black	10+ years	E	3413		-4.3	50		Strain rates from this reference ranged from 0.001-0.01 s-1.	[#erlebacher_effects_1992]
7.06			Ivory Black	10+ years	E	1467		5.6	50		Strain rates from this reference ranged from 0.001-0.01 s-1.	[#erlebacher_effects_1992]
7.07			Ivory Black	10+ years	E	4.75		33.4	50		Strain rates from this reference ranged from 0.001-0.01 s-1.	[#erlebacher_effects_1992]
8.01			Raw Sienna	10+ years	E	70		23	50		Strain rates from this reference ranged from 0.001-0.01 s-1.	[#erlebacher_effects_1992]
8.02			Raw Sienna	10+ years	E	223		23	5		Strain rates from this reference ranged from 0.001-0.01 s-1.	[#erlebacher_effects_1992]
9.01			Titanium White	10+ years	E	147		23	50		Strain rates from this reference ranged from 0.001-0.01 s-1.	[#erlebacher_effects_1992]
9.02			Titanium White	10+ years	E	978		23	5		Strain rates from this reference ranged from 0.001-0.01 s-1.	[#erlebacher_effects_1992]
9.03			Titanium White	10+ years	E	10476		-6.5	5		Strain rates from this reference ranged from 0.001-0.01 s-1.	[#erlebacher_effects_1992]
9.04			Titanium White	10+ years	E	6286		5	5		Strain rates from this reference ranged from 0.001-0.01 s-1.	[#erlebacher_effects_1992]
9.05			Titanium White	13 years	Eeq	83.8		23	50		Stress relaxation	[#mecklenburg_mechanical_1994]
10.01		Liquitex gloss medium		10 days	σT	8.7	α	25	40	5	aged in the dark	[#whitmore_natural_1995]
10.01		Liquitex gloss medium		10 days	σY	2.2	α	25	40	5	aged in the dark	[#whitmore_natural_1995]
10.02		Liquitex gloss medium		36 days	σT	11.7	α	25	40	5	aged in the dark	[#whitmore_natural_1995]
10.02		Liquitex gloss medium		36 days	σY	3.6	α	25	40	5	aged in the dark	[#whitmore_natural_1995]
10.03		Liquitex gloss medium		65 days	σT	12.2	α	25	40	5	aged in the dark	[#whitmore_natural_1995]
10.03		Liquitex gloss medium		65 days	σY	5.9	α	25	40	5	aged in the dark	[#whitmore_natural_1995]
10.04		Liquitex gloss medium		72 days	σT	13.1	α	25	40	5	aged in the dark	[#whitmore_natural_1995]
10.04		Liquitex gloss medium		72 days	σY	5.8	α	25	40	5	aged in the dark	[#whitmore_natural_1995]
10.05		Liquitex gloss medium		120 days	σT	14	α	25	40	5	aged in the dark	[#whitmore_natural_1995]
10.05		Liquitex gloss medium		120 days	σY	6.8	α	25	40	5	aged in the dark	[#whitmore_natural_1995]
10.06		Liquitex gloss medium		153 days	σT	13.7	α	25	40	5	aged in the dark	[#whitmore_natural_1995]
10.06		Liquitex gloss medium		153 days	σY	6.4	α	25	40	5	aged in the dark	[#whitmore_natural_1995]
10.07		Liquitex gloss medium		167 days	σT	13.9	α	25	40	5	aged in the dark	[#whitmore_natural_1995]
10.07		Liquitex gloss medium		167 days	σY	6.2	α	25	40	5	aged in the dark	[#whitmore_natural_1995]
10.08		Liquitex gloss medium		569 days	σT	13.8	α	25	40	5	aged in the dark	[#whitmore_natural_1995]
10.08		Liquitex gloss medium		569 days	σY	5.3	α	25	40	5	aged in the dark	[#whitmore_natural_1995]
10.09		Liquitex gloss medium		0 days of UV-B exposure	σT	12.3	α	23	50	5	aged in the dark 60 days before UV-B exposure	[#whitmore_natural_1995]
10.09		Liquitex gloss medium		0 days of UV-B exposure	σY	5.6	α	23	50	5	aged in the dark 60 days before UV-B exposure	[#whitmore_natural_1995]
10.1		Liquitex gloss medium		3 days of UV-B exposure	σT	9.6	α	23	50	5	aged in the dark 60 days before UV-B exposure	[#whitmore_natural_1995]
10.1		Liquitex gloss medium		3 days of UV-B exposure	σY	4.1	α	23	50	5	aged in the dark 60 days before UV-B exposure	[#whitmore_natural_1995]
10.11		Liquitex gloss medium		7 days of UV-B exposure	σT	9.7	α	23	50	5	aged in the dark 60 days before UV-B exposure	[#whitmore_natural_1995]
10.11		Liquitex gloss medium		7 days of UV-B exposure	σY	7.1	α	23	50	5	aged in the dark 60 days before UV-B exposure	[#whitmore_natural_1995]
10.12		Liquitex gloss medium		20 days of UV-B exposure	σT	9.04	α	23	50	5	aged in the dark 60 days before UV-B exposure	[#whitmore_natural_1995]
10.12		Liquitex gloss medium		20 days of UV-B exposure	σY	9.9	α	23	50	5	aged in the dark 60 days before UV-B exposure	[#whitmore_natural_1995]
10.13		Liquitex gloss medium		27 days of UV-B exposure	σT	2.6	α	23	50	5	aged in the dark 60 days before UV-B exposure	[#whitmore_natural_1995]
10.13		Liquitex gloss medium		27 days of UV-B exposure	σY	2.7	α	23	50	5	aged in the dark 60 days before UV-B exposure	[#whitmore_natural_1995]
10.14		Liquitex gloss medium		0 days of UV-A exposure	σT	12.3	α	23	50	5	aged in the dark 60 days before UV-A exposure	[#whitmore_natural_1995]
10.14		Liquitex gloss medium		0 days of UV-A exposure	σY	5.6	α	23	50	5	aged in the dark 60 days before UV-A exposure	[#whitmore_natural_1995]
10.15		Liquitex gloss medium		20 days of UV-A exposure	σT	9.6	α	23	50	5	aged in the dark 60 days before UV-A exposure	[#whitmore_natural_1995]
10.15		Liquitex gloss medium		20 days of UV-A exposure	σY	3.9	α	23	50	5	aged in the dark 60 days before UV-A exposure	[#whitmore_natural_1995]
10.16		Liquitex gloss medium		42 days of UV-A exposure	σT	9.3	α	23	50	5	aged in the dark 60 days before UV-A exposure	[#whitmore_natural_1995]
10.16		Liquitex gloss medium		42 days of UV-A exposure	σY	4.8	α	23	50	5	aged in the dark 60 days before UV-A exposure	[#whitmore_natural_1995]
10.17		Liquitex gloss medium		84 days of UV-A exposure	σT	9.7	α	23	50	5	aged in the dark 60 days before UV-A exposure	[#whitmore_natural_1995]
10.17		Liquitex gloss medium		84 days of UV-A exposure	σY	8	α	23	50	5	aged in the dark 60 days before UV-A exposure	[#whitmore_natural_1995]
11.01		Rhoplex AC-234	Bone Black	7 months	σT	7.4	α	21	20	0.0028		[#hagan_effects_2004]
11.01		Rhoplex AC-234	Bone Black	7 months	Es	81.7	α	21	20	0.0028		[#hagan_effects_2004]
11.02		Rhoplex AC-234	Bone Black	7 months	σT	5.7	α	21	40	0.0028		[#hagan_effects_2004]
11.02		Rhoplex AC-234	Bone Black	7 months	Es	48.9	α	21	40	0.0028		[#hagan_effects_2004]
11.03		Rhoplex AC-234	Bone Black	7 months	σT	25		1.5	50	0.0028		[#hagan_effects_2004]
11.03		Rhoplex AC-234	Bone Black	7 months	Es	2281		1.5	50	0.0028		[#hagan_effects_2004]
11.04		Rhoplex AC-234	Bone Black	7 months	σT	8.4		7.5	50	0.0028		[#hagan_effects_2004]
11.04		Rhoplex AC-234	Bone Black	7 months	Es	643		7.5	50	0.0028		[#hagan_effects_2004]
11.05		Rhoplex AC-234	Bone Black	2 days	σT	1.8		21	50	0.0028		[#hagan_effects_2004]
11.05		Rhoplex AC-234	Bone Black	2 days	Es	9.9		21	50	0.0028		[#hagan_effects_2004]
11.06		Rhoplex AC-234	Bone Black	5 months	σT	4.4		21	50	0.0028		[#hagan_effects_2004]
11.06		Rhoplex AC-234	Bone Black	5 months	Es	24		21	50	0.0028		[#hagan_effects_2004]
11.07		Rhoplex AC-234	Bone Black	7 months	σT	5	α	21	50	0.0028		[#hagan_effects_2004]
11.07		Rhoplex AC-234	Bone Black	7 months	Es	31	α	21	50	0.0028		[#hagan_effects_2004]
11.08		Rhoplex AC-234	Bone Black	13 months	σT	4.8		21	50	0.0028		[#hagan_effects_2004]
11.08		Rhoplex AC-234	Bone Black	13 months	Es	31		21	50	0.0028		[#hagan_effects_2004]
11.09		Rhoplex AC-234	Bone Black	7 months	σT	3.2		31	50	0.0028		[#hagan_effects_2004]
11.09		Rhoplex AC-234	Bone Black	7 months	Es	19		31	50	0.0028		[#hagan_effects_2004]
11.1		Rhoplex AC-234	Bone Black	7 months	σT	4.1	α	21	60	0.0028		[#hagan_effects_2004]
11.1		Rhoplex AC-234	Bone Black	7 months	Es	18.8	α	21	60	0.0028		[#hagan_effects_2004]
11.11		Rhoplex AC-234	Bone Black	7 months	σT	2.3	α	21	80	0.0028		[#hagan_effects_2004]
11.11		Rhoplex AC-234	Bone Black	7 months	Es	6.3	α	21	80	0.0028		[#hagan_effects_2004]
11.12		Rhoplex AC-234	Bone Black	7 months	σT	9.1	α	21	20	0.0028	Immersed in water 24 hours, dried 72 hours	[#hagan_effects_2004]
11.12		Rhoplex AC-234	Bone Black	7 months	Es	99.5	α	21	20	0.0028	Immersed in water 24 hours, dried 72 hours	[#hagan_effects_2004]
11.13		Rhoplex AC-234	Bone Black	7 months	σT	7	α	21	40	0.0028	Immersed in water 24 hours, dried 72 hours	[#hagan_effects_2004]
11.13		Rhoplex AC-234	Bone Black	7 months	Es	72.3	α	21	40	0.0028	Immersed in water 24 hours, dried 72 hours	[#hagan_effects_2004]
11.14		Rhoplex AC-234	Bone Black	7 months	σT	5.3	α	21	50	0.0028	Immersed in water 15 min, dried 72 hours	[#hagan_effects_2004]
11.14		Rhoplex AC-234	Bone Black	7 months	Es	36.7	α	21	50	0.0028	Immersed in water 15 min, dried 72 hours	[#hagan_effects_2004]
11.15		Rhoplex AC-234	Bone Black	7 months	σT	5.7	α	21	50	0.0028	Immersed in water 1 hour, dried 72 hours	[#hagan_effects_2004]
11.15		Rhoplex AC-234	Bone Black	7 months	Es	42.2	α	21	50	0.0028	Immersed in water 1 hour, dried 72 hours	[#hagan_effects_2004]
11.16		Rhoplex AC-234	Bone Black	7 months	σT	6.1	α	21	50	0.0028	Immersed in water 6 hours, dried 72 hours	[#hagan_effects_2004]
11.16		Rhoplex AC-234	Bone Black	7 months	Es	50.8	α	21	50	0.0028	Immersed in water 6 hours, dried 72 hours	[#hagan_effects_2004]
11.17		Rhoplex AC-234	Bone Black	7 months	σT	6.3	α	21	50	0.0028	Immersed in water 24 hours, dried 72 hours	[#hagan_effects_2004]
11.17		Rhoplex AC-234	Bone Black	7 months	Es	53.5	α	21	50	0.0028	Immersed in water 24 hours, dried 72 hours	[#hagan_effects_2004]
11.18		Rhoplex AC-234	Bone Black	7 months	σT	5.3	α	21	60	0.0028	Immersed in water 24 hours, dried 72 hours	[#hagan_effects_2004]
11.18		Rhoplex AC-234	Bone Black	7 months	Es	40.2		21	60	0.0028	Immersed in water 24 hours, dried 72 hours	[#hagan_effects_2004]
11.19		Rhoplex AC-234	Bone Black	7 months	σT	3.7	α	21	80	0.0028	Immersed in water 24 hours, dried 72 hours	[#hagan_effects_2004]
11.19		Rhoplex AC-234	Bone Black	7 months	Es	17.4	α	21	80	0.0028	Immersed in water 24 hours, dried 72 hours	[#hagan_effects_2004]
12.01		Rhoplex AC-234	Naphthol Red Light	7 months	σT	4.5	α	21	20	0.0028		[#hagan_effects_2004]
12.01		Rhoplex AC-234	Naphthol Red Light	7 months	Es	39.4	α	21	20	0.0028		[#hagan_effects_2004]
12.02		Rhoplex AC-234	Naphthol Red Light	7 months	σT	3	α	21	40	0.0028		[#hagan_effects_2004]
12.02		Rhoplex AC-234	Naphthol Red Light	7 months	Es	22.9	α	21	40	0.0028		[#hagan_effects_2004]
12.03		Rhoplex AC-234	Naphthol Red Light	7 months	σT	2.3	α	21	50	0.0028		[#hagan_effects_2004]
12.03		Rhoplex AC-234	Naphthol Red Light	7 months	Es	13.7	α	21	50	0.0028		[#hagan_effects_2004]
12.04		Rhoplex AC-234	Naphthol Red Light	7 months	σT	1.8	α	21	60	0.0028		[#hagan_effects_2004]
12.04		Rhoplex AC-234	Naphthol Red Light	7 months	Es	7	α	21	60	0.0028		[#hagan_effects_2004]
12.05		Rhoplex AC-234	Naphthol Red Light	7 months	σT	1	α	21	80	0.0028		[#hagan_effects_2004]
12.05		Rhoplex AC-234	Naphthol Red Light	7 months	Es	5.7	α	21	80	0.0028		[#hagan_effects_2004]
12.06		Rhoplex AC-234	Naphthol Red Light	7 months	σT	5.7	α	21	20	0.0028	Immersed in water 24 hours, dried 72 hours	[#hagan_effects_2004]
12.06		Rhoplex AC-234	Naphthol Red Light	7 months	Es	50.7	α	21	20	0.0028	Immersed in water 24 hours, dried 72 hours	[#hagan_effects_2004]
12.07		Rhoplex AC-234	Naphthol Red Light	7 months	σT	4.2	α	21	40	0.0028	Immersed in water 24 hours, dried 72 hours	[#hagan_effects_2004]
12.07		Rhoplex AC-234	Naphthol Red Light	7 months	Es	35.2	α	21	40	0.0028	Immersed in water 24 hours, dried 72 hours	[#hagan_effects_2004]
12.08		Rhoplex AC-234	Naphthol Red Light	7 months	σT	3.3	α	21	50	0.0028	Immersed in water 24 hours, dried 72 hours	[#hagan_effects_2004]
12.08		Rhoplex AC-234	Naphthol Red Light	7 months	Es	27	α	21	50	0.0028	Immersed in water 24 hours, dried 72 hours	[#hagan_effects_2004]
12.09		Rhoplex AC-234	Naphthol Red Light	7 months	σT	2.9	α	21	60	0.0028	Immersed in water 24 hours, dried 72 hours	[#hagan_effects_2004]
12.09		Rhoplex AC-234	Naphthol Red Light	7 months	Es	21.6	α	21	60	0.0028	Immersed in water 24 hours, dried 72 hours	[#hagan_effects_2004]
12.1		Rhoplex AC-234	Naphthol Red Light	7 months	σT	1.9	α	21	80	0.0028	Immersed in water 24 hours, dried 72 hours	[#hagan_effects_2004]
12.1		Rhoplex AC-234	Naphthol Red Light	7 months	Es	12.6	α	21	80	0.0028	Immersed in water 24 hours, dried 72 hours	[#hagan_effects_2004]
13.01		Golden Acrylic (BA/MMA)	Titanium White	3 months	E	23	α	21	50	2e-05		[#hagan_factors_2007]
13.02		Golden Acrylic (BA/MMA)	Titanium White	3 months	E	41	α	21	50	0.0002		[#hagan_factors_2007]
13.03		Golden Acrylic (BA/MMA)	Titanium White	3 months	E	204	α	21	15	0.002		[#hagan_factors_2007]
13.04		Golden Acrylic (BA/MMA)	Titanium White	3 months	E	89	α	21	35	0.002		[#hagan_factors_2007]
13.05		Golden Acrylic (BA/MMA)	Titanium White	3 months	σT	11.5	α	21	50	0.002		[#hagan_factors_2007]
13.06		Golden Acrylic (BA/MMA)	Titanium White	3 months	E	90	α	21	50	0.002		[#hagan_factors_2007]
13.07		Golden Acrylic (BA/MMA)	Titanium White	3 months	E	13	α	21	65	0.002		[#hagan_factors_2007]
13.08		Golden Acrylic (BA/MMA)	Titanium White	3 months	E	3.2	α	21	85	0.002		[#hagan_factors_2007]
13.09		Golden Acrylic (BA/MMA)	Titanium White	3 months	E	227	α	21	50	0.02		[#hagan_factors_2007]
13.1		Golden Acrylic (BA/MMA)	Titanium White	3 months	E	444	α	21	50	0.2		[#hagan_factors_2007]
14.01		Dulux Trade: Eggshell	Pure Brilliant White	3 months	σT	5.6	α	21	50	0.002		[#hagan_factors_2007]
15.01		Dulux Trade: Vinyl Silk	Pure Brilliant White	3 months	σT	3.6	α	21	50	0.002		[#hagan_factors_2007]
16.01		Dulux Trade: Matte	Pure Brilliant White	3 months	σT	4.4	α	21	50	0.002		[#hagan_factors_2007]
17.01		Crown: Matte	Pure Brilliant White	3 months	E	1110	α	21	50	2e-06		[#hagan_factors_2007]
17.02		Crown: Matte	Pure Brilliant White	3 months	E	1250	α	21	50	2e-05		[#hagan_factors_2007]
17.03		Crown: Matte	Pure Brilliant White	3 months	E	1570	α	21	50	0.0002		[#hagan_factors_2007]
17.04		Crown: Matte	Pure Brilliant White	3 months	σT	4.3	α	21	50	0.002		[#hagan_factors_2007]
17.05		Crown: Matte	Pure Brilliant White	3 months	E	2080	α	21	50	0.002		[#hagan_factors_2007]
17.06		Crown: Matte	Pure Brilliant White	3 months	E	2430	α	21	50	0.02		[#hagan_factors_2007]
18.01	Golden Acrylic Gesso Primer	Liquitex	Cadmium Selenosulfide	6 days ambient, 112 days thermal aging	Es	0.11		20	55	0.001	2-layer system; Thermal aging: 60°C/55% RH, Es at 0.5% strain	[#young_interfacial_2007]
18.01	Golden Acrylic Gesso Primer	Liquitex	Cadmium Selenosulfide	6 days ambient, 112 days thermal aging	Es	0.04		20	55	0.001	2-layer system; Thermal aging: 60°C/55% RH, Es at 5.0% strain	[#young_interfacial_2007]
18.02	Golden Acrylic Gesso Primer	Liquitex	Cadmium Selenosulfide	6 days ambient, 0 days thermal aging	Es	0.06		20	55	0.001	2-layer system; Thermal aging: 60°C/55% RH, Es at 0.5% strain	[#young_interfacial_2007]
18.02	Golden Acrylic Gesso Primer	Liquitex	Cadmium Selenosulfide	6 days ambient, 0 days thermal aging	Es	0.03		20	55	0.001	2-layer system; Thermal aging: 60°C/55% RH, Es at 5.0% strain	[#young_interfacial_2007]
19.01	Roberson Acrylic Primer	Liquitex	Cadmium Selenosulfide	6 days ambient, 112 days thermal aging	Es	0.04		20	55	0.001	2-layer system; Thermal aging: 60°C/55% RH, Es at 5.0% strain	[#young_interfacial_2007]
19.01	Roberson Acrylic Primer	Liquitex	Cadmium Selenosulfide	6 days ambient, 0 days thermal aging	Es	0.02		20	55	0.001	2-layer system; Thermal aging: 60°C/55% RH, Es at 5.0% strain	[#young_interfacial_2007]
20.01	Winsor & Newton Alkyd Primer	Liquitex	Cadmium Selenosulfide	6 days ambient, 112 days thermal aging	Es	0.14		20	55	0.001	2-layer system; Thermal aging: 60°C/55% RH, Es at 5.0% strain	[#young_interfacial_2007]
20.01	Winsor & Newton Alkyd Primer	Liquitex	Cadmium Selenosulfide	6 days ambient, 0 days thermal aging	Es	0.05		20	55	0.001	2-layer system; Thermal aging: 60°C/55% RH, Es at 5.0% strain	[#young_interfacial_2007]
21.01	Spectrum Alkyd Primer	Liquitex	Cadmium Selenosulfide	6 days ambient, 112 days thermal aging	Es	0.17		20	55	0.001	2-layer system; Thermal aging: 60°C/55% RH, Es at 0.5% strain	[#young_interfacial_2007]
21.01	Spectrum Alkyd Primer	Liquitex	Cadmium Selenosulfide	6 days ambient, 112 days thermal aging	Es	0.08		20	55	0.001	2-layer system; Thermal aging: 60°C/55% RH, Es at 5.0% strain	[#young_interfacial_2007]
21.02	Spectrum Alkyd Primer	Liquitex	Cadmium Selenosulfide	6 days ambient, 0 days thermal aging	Es	0.05		20	55	0.001	2-layer system; Thermal aging: 60°C/55% RH, Es at 0.5% strain	[#young_interfacial_2007]
21.02	Spectrum Alkyd Primer	Liquitex	Cadmium Selenosulfide	6 days ambient, 0 days thermal aging	Es	0.05		20	55	0.001	2-layer system; Thermal aging: 60°C/55% RH, Es at 5.0% strain	[#young_interfacial_2007]
22.01		Liquitex Ground		4-42 months	E	1370	α	21	55	0.002		[#ormsby_comparing_2008]
22.02		Liquitex Ground		4-42 months	E	3300	α	21	20	0.002		[#ormsby_comparing_2008]
22.03		Liquitex Ground		4-42 months	E	3600	α	10	55	0.002		[#ormsby_comparing_2008]
23.01		Golden Ground		4-42 months	E	750	α	21	55	0.002		[#ormsby_comparing_2008]
23.02		Golden Ground		4-42 months	E	1180	α	21	20	0.002		[#ormsby_comparing_2008]
23.03		Golden Ground		4-42 months	E	2540	α	10	55	0.002		[#ormsby_comparing_2008]
24.01		Winsor & Newton Ground		4-42 months	E	510	α	21	55	0.002		[#ormsby_comparing_2008]
24.02		Winsor & Newton Ground		4-42 months	E	880	α	21	20	0.002		[#ormsby_comparing_2008]
24.03		Winsor & Newton Ground		4-42 months	E	2040	α	10	55	0.002		[#ormsby_comparing_2008]
25.01		Talens Ground		4-42 months	E	600	α	21	55	0.002		[#ormsby_comparing_2008]
25.02		Talens Ground		4-42 months	E	1140	α	21	20	0.002		[#ormsby_comparing_2008]
25.03		Talens Ground		4-42 months	E	2120	α	10	55	0.002		[#ormsby_comparing_2008]
26.01		Liquitex	Titanium White	4-42 months	E	860	α	21	55	0.002		[#ormsby_comparing_2008]
26.02		Liquitex	Titanium White	4-42 months	E	1850	α	21	20	0.002		[#ormsby_comparing_2008]
26.03		Liquitex	Titanium White	4-42 months	E	2540	α	10	55	0.002		[#ormsby_comparing_2008]
27.01		Golden	Titanium White	4-42 months	E	380	α	21	55	0.002		[#ormsby_comparing_2008]
27.02		Golden	Titanium White	4-42 months	E	740	α	21	20	0.002		[#ormsby_comparing_2008]
27.03		Golden	Titanium White	4-42 months	E	1570	α	10	55	0.002		[#ormsby_comparing_2008]
28.01		Winsor & Newton	Titanium White	4-42 months	E	350	α	21	55	0.002		[#ormsby_comparing_2008]
28.02		Winsor & Newton	Titanium White	4-42 months	E	630	α	21	20	0.002		[#ormsby_comparing_2008]
28.03		Winsor & Newton	Titanium White	4-42 months	E	1680	α	10	55	0.002		[#ormsby_comparing_2008]
29.01		Talens	Titanium White	4-42 months	E	560	α	21	55	0.002		[#ormsby_comparing_2008]
29.02		Talens	Titanium White	4-42 months	E	1180	α	21	20	0.002		[#ormsby_comparing_2008]
29.03		Talens	Titanium White	4-42 months	E	1580	α	10	55	0.002		[#ormsby_comparing_2008]
30.01		Golden Gesso		7 months	E	4590		-10	55	0.002		[#young_cold_2008]
30.02		Golden Gesso		7 months	E	2980		0	60	0.002		[#young_cold_2008]
30.03		Golden Gesso		7 months	E	2085		10	57	0.002		[#young_cold_2008]
30.04		Golden Gesso		7 months	E	390		20	54	0.002		[#young_cold_2008]
31.01		Liquitex Gesso		7 months	E	7430		-10	55	0.002		[#young_cold_2008]
31.02		Liquitex Gesso		7 months	E	3400		0	60	0.002		[#young_cold_2008]
31.03		Liquitex Gesso		7 months	E	2810		10	57	0.002		[#young_cold_2008]
31.04		Liquitex Gesso		7 months	E	350		20	54	0.002		[#young_cold_2008]
32.01		Winsor & Newton Gesso		7 months	E	6570		-10	55	0.002		[#young_cold_2008]
32.02		Winsor & Newton Gesso		7 months	E	3890		0	60	0.002		[#young_cold_2008]
32.03		Winsor & Newton Gesso		7 months	E	3240		10	57	0.002		[#young_cold_2008]
32.04		Winsor & Newton Gesso		7 months	E	451		20	54	0.002		[#young_cold_2008]
33.01		Winsor & Newton Galeria		7 months	E	5710		-10	55	0.002		[#young_cold_2008]
33.02		Winsor & Newton Galeria		7 months	E	4180		0	60	0.002		[#young_cold_2008]
33.03		Winsor & Newton Galeria		7 months	E	1930		10	57	0.002		[#young_cold_2008]
33.04		Winsor & Newton Galeria		7 months	E	366		20	54	0.002		[#young_cold_2008]
34.01		Roberson Primer		7 months	E	3320		-10	55	0.002		[#young_cold_2008]
34.02		Roberson Primer		7 months	E	1760		0	60	0.002		[#young_cold_2008]
34.03		Roberson Primer		7 months	E	710		10	57	0.002		[#young_cold_2008]
34.04		Roberson Primer		7 months	E	120		20	54	0.002		[#young_cold_2008]
35.01		Golden Artist Colors PBA-MMA		1 year	Es	1850	α	-10	50	0.02	Es at 0.5% strain	[#hagan_tensile_2009]
35.02		Golden Artist Colors PBA-MMA		1 year	Es	1430	α	0	50	0.02	Es at 0.5% strain	[#hagan_tensile_2009]
35.03		Golden Artist Colors PBA-MMA		1 year	Es	760	α	10	50	0.02	Es at 0.5% strain	[#hagan_tensile_2009]
35.04		Golden Artist Colors PBA-MMA		1 year	Es	160	α	20	50	0.02	Es at 0.5% strain	[#hagan_tensile_2009]
35.05		Golden Artist Colors PBA-MMA		1 year	Es	18	α	30	50	0.02	Es at 0.5% strain	[#hagan_tensile_2009]
35.06		Golden Artist Colors PBA-MMA		1 year	Es	1600	α	-10	50	0.002	Es at 0.5% strain	[#hagan_tensile_2009]
35.07		Golden Artist Colors PBA-MMA		1 year	Es	1275	α	0	50	0.002	Es at 0.5% strain	[#hagan_tensile_2009]
35.08		Golden Artist Colors PBA-MMA		1 year	Es	415	α	10	50	0.002	Es at 0.5% strain	[#hagan_tensile_2009]
35.09		Golden Artist Colors PBA-MMA		1 year	Es	50	α	20	50	0.002	Es at 0.5% strain	[#hagan_tensile_2009]
35.1		Golden Artist Colors PBA-MMA		1 year	Es	5	α	30	50	0.002	Es at 0.5% strain	[#hagan_tensile_2009]
35.11		Golden Artist Colors PBA-MMA		1 year	Es	1320	α	-10	50	0.0002	Es at 0.5% strain	[#hagan_tensile_2009]
35.12		Golden Artist Colors PBA-MMA		1 year	Es	725	α	0	50	0.0002	Es at 0.5% strain	[#hagan_tensile_2009]
35.13		Golden Artist Colors PBA-MMA		1 year	Es	200	α	10	50	0.0002	Es at 0.5% strain	[#hagan_tensile_2009]
35.14		Golden Artist Colors PBA-MMA		1 year	Es	14	α	20	50	0.0002	Es at 0.5% strain	[#hagan_tensile_2009]
35.15		Golden Artist Colors PBA-MMA		1 year	Es	3	α	30	50	0.0002	Es at 0.5% strain	[#hagan_tensile_2009]
35.16		Golden Artist Colors PBA-MMA		1 year	Es	950	α	-10	50	2e-05	Es at 0.5% strain	[#hagan_tensile_2009]
35.17		Golden Artist Colors PBA-MMA		1 year	Es	370	α	0	50	2e-05	Es at 0.5% strain	[#hagan_tensile_2009]
35.18		Golden Artist Colors PBA-MMA		1 year	Es	60	α	10	50	2e-05	Es at 0.5% strain	[#hagan_tensile_2009]
35.19		Golden Artist Colors PBA-MMA		1 year	Es	4	α	20	50	2e-05	Es at 0.5% strain	[#hagan_tensile_2009]
35.2		Golden Artist Colors PBA-MMA		1 year	Es	2	α	30	50	2e-05	Es at 0.5% strain	[#hagan_tensile_2009]
36.01		Golden Artist Colors PBA-MMA	Titanium white (0.13 v/v)	1 year	Es	2530	α	-10	50	0.02	Es at 0.5% strain	[#hagan_tensile_2009]
36.02		Golden Artist Colors PBA-MMA	Titanium white (0.13 v/v)	1 year	Es	2090	α	-10	50	0.002	Es at 0.5% strain	[#hagan_tensile_2009]
36.03		Golden Artist Colors PBA-MMA	Titanium white (0.13 v/v)	1 year	Es	1860	α	0	50	0.02	Es at 0.5% strain	[#hagan_tensile_2009]
36.04		Golden Artist Colors PBA-MMA	Titanium white (0.13 v/v)	1 year	Es	1700	α	-10	50	0.0002	Es at 0.5% strain	[#hagan_tensile_2009]
36.05		Golden Artist Colors PBA-MMA	Titanium white (0.13 v/v)	1 year	Es	1440	α	0	50	0.002	Es at 0.5% strain	[#hagan_tensile_2009]
36.06		Golden Artist Colors PBA-MMA	Titanium white (0.13 v/v)	1 year	Es	1275	α	-10	50	2e-05	Es at 0.5% strain	[#hagan_tensile_2009]
36.07		Golden Artist Colors PBA-MMA	Titanium white (0.13 v/v)	1 year	Es	1175	α	10	50	0.02	Es at 0.5% strain	[#hagan_tensile_2009]
36.08		Golden Artist Colors PBA-MMA	Titanium white (0.13 v/v)	1 year	Es	965	α	0	50	0.0002	Es at 0.5% strain	[#hagan_tensile_2009]
36.09		Golden Artist Colors PBA-MMA	Titanium white (0.13 v/v)	1 year	Es	720	α	10	50	0.002	Es at 0.5% strain	[#hagan_tensile_2009]
36.1		Golden Artist Colors PBA-MMA	Titanium white (0.13 v/v)	1 year	Es	595	α	0	50	2e-05	Es at 0.5% strain	[#hagan_tensile_2009]
36.11		Golden Artist Colors PBA-MMA	Titanium white (0.13 v/v)	1 year	Es	340	α	10	50	0.0002	Es at 0.5% strain	[#hagan_tensile_2009]
36.12		Golden Artist Colors PBA-MMA	Titanium white (0.13 v/v)	1 year	Es	115	α	10	50	2e-05	Es at 0.5% strain	[#hagan_tensile_2009]
36.13		Golden Artist Colors PBA-MMA	Titanium white (0.13 v/v)	1 year	Es	47	α	30	50	0.02	Es at 0.5% strain	[#hagan_tensile_2009]
36.14		Golden Artist Colors PBA-MMA	Titanium white (0.13 v/v)	1 year	Es	34	α	20	50	0.0002	Es at 0.5% strain	[#hagan_tensile_2009]
36.15		Golden Artist Colors PBA-MMA	Titanium white (0.13 v/v)	1 year	Es	15	α	30	50	0.002	Es at 0.5% strain	[#hagan_tensile_2009]
36.16		Golden Artist Colors PBA-MMA	Titanium white (0.13 v/v)	1 year	Es	11	α	20	50	2e-05	Es at 0.5% strain	[#hagan_tensile_2009]
36.17		Golden Artist Colors PBA-MMA	Titanium white (0.13 v/v)	1 year	Es	7	α	30	50	0.0002	Es at 0.5% strain	[#hagan_tensile_2009]
36.18		Golden Artist Colors PBA-MMA	Titanium white (0.13 v/v)	1 year	Es	4	α	30	50	2e-05	Es at 0.5% strain	[#hagan_tensile_2009]
37.01		Golden Artist Colors PBA-MMA	Titanium white (0.25 v/v)	1 year	Es	3590	α	-10	50	0.02	Es at 0.5% strain	[#hagan_tensile_2009]
37.02		Golden Artist Colors PBA-MMA	Titanium white (0.25 v/v)	1 year	Es	2980	α	-10	50	0.002	Es at 0.5% strain	[#hagan_tensile_2009]
37.03		Golden Artist Colors PBA-MMA	Titanium white (0.25 v/v)	1 year	Es	2590	α	0	50	0.02	Es at 0.5% strain	[#hagan_tensile_2009]
37.04		Golden Artist Colors PBA-MMA	Titanium white (0.25 v/v)	1 year	Es	2410	α	-10	50	0.0002	Es at 0.5% strain	[#hagan_tensile_2009]
37.05		Golden Artist Colors PBA-MMA	Titanium white (0.25 v/v)	1 year	Es	1865	α	0	50	0.002	Es at 0.5% strain	[#hagan_tensile_2009]
37.06		Golden Artist Colors PBA-MMA	Titanium white (0.25 v/v)	1 year	Es	1850	α	-10	50	2e-05	Es at 0.5% strain	[#hagan_tensile_2009]
37.07		Golden Artist Colors PBA-MMA	Titanium white (0.25 v/v)	1 year	Es	1710	α	10	50	0.02	Es at 0.5% strain	[#hagan_tensile_2009]
37.08		Golden Artist Colors PBA-MMA	Titanium white (0.25 v/v)	1 year	Es	1240	α	0	50	0.0002	Es at 0.5% strain	[#hagan_tensile_2009]
37.09		Golden Artist Colors PBA-MMA	Titanium white (0.25 v/v)	1 year	Es	950	α	10	50	0.002	Es at 0.5% strain	[#hagan_tensile_2009]
37.1		Golden Artist Colors PBA-MMA	Titanium white (0.25 v/v)	1 year	Es	720	α	0	50	2e-05	Es at 0.5% strain	[#hagan_tensile_2009]
37.11		Golden Artist Colors PBA-MMA	Titanium white (0.25 v/v)	1 year	Es	520	α	20	50	0.02	Es at 0.5% strain	[#hagan_tensile_2009]
37.12		Golden Artist Colors PBA-MMA	Titanium white (0.25 v/v)	1 year	Es	440	α	10	50	0.0002	Es at 0.5% strain	[#hagan_tensile_2009]
37.13		Golden Artist Colors PBA-MMA	Titanium white (0.25 v/v)	1 year	Es	210	α	20	50	0.002	Es at 0.5% strain	[#hagan_tensile_2009]
37.14		Golden Artist Colors PBA-MMA	Titanium white (0.25 v/v)	1 year	Es	150	α	10	50	2e-05	Es at 0.5% strain	[#hagan_tensile_2009]
37.15		Golden Artist Colors PBA-MMA	Titanium white (0.25 v/v)	1 year	Es	115	α	30	50	0.02	Es at 0.5% strain	[#hagan_tensile_2009]
37.16		Golden Artist Colors PBA-MMA	Titanium white (0.25 v/v)	1 year	Es	77	α	20	50	0.0002	Es at 0.5% strain	[#hagan_tensile_2009]
37.17		Golden Artist Colors PBA-MMA	Titanium white (0.25 v/v)	1 year	Es	48	α	30	50	0.002	Es at 0.5% strain	[#hagan_tensile_2009]
37.18		Golden Artist Colors PBA-MMA	Titanium white (0.25 v/v)	1 year	Es	32	α	20	50	2e-05	Es at 0.5% strain	[#hagan_tensile_2009]
37.19		Golden Artist Colors PBA-MMA	Titanium white (0.25 v/v)	1 year	Es	23	α	30	50	0.0002	Es at 0.5% strain	[#hagan_tensile_2009]
37.2		Golden Artist Colors PBA-MMA	Titanium white (0.25 v/v)	1 year	Es	15	α	30	50	2e-05	Es at 0.5% strain	[#hagan_tensile_2009]
38.01		Golden Artist Colors PBA-MMA	Titanium white (0.38 v/v)	1 year	Es	4770	α	-10	50	0.02	Es at 0.5% strain	[#hagan_tensile_2009]
38.02		Golden Artist Colors PBA-MMA	Titanium white (0.38 v/v)	1 year	Es	3920	α	-10	50	0.002	Es at 0.5% strain	[#hagan_tensile_2009]
38.03		Golden Artist Colors PBA-MMA	Titanium white (0.38 v/v)	1 year	Es	3430	α	0	50	0.02	Es at 0.5% strain	[#hagan_tensile_2009]
38.04		Golden Artist Colors PBA-MMA	Titanium white (0.38 v/v)	1 year	Es	3380	α	-10	50	0.0002	Es at 0.5% strain	[#hagan_tensile_2009]
38.05		Golden Artist Colors PBA-MMA	Titanium white (0.38 v/v)	1 year	Es	2830	α	0	50	0.002	Es at 0.5% strain	[#hagan_tensile_2009]
38.06		Golden Artist Colors PBA-MMA	Titanium white (0.38 v/v)	1 year	Es	2670	α	-10	50	2e-05	Es at 0.5% strain	[#hagan_tensile_2009]
38.07		Golden Artist Colors PBA-MMA	Titanium white (0.38 v/v)	1 year	Es	2350	α	10	50	0.02	Es at 0.5% strain	[#hagan_tensile_2009]
38.08		Golden Artist Colors PBA-MMA	Titanium white (0.38 v/v)	1 year	Es	1770	α	0	50	0.0002	Es at 0.5% strain	[#hagan_tensile_2009]
38.09		Golden Artist Colors PBA-MMA	Titanium white (0.38 v/v)	1 year	Es	1460	α	10	50	0.002	Es at 0.5% strain	[#hagan_tensile_2009]
38.1		Golden Artist Colors PBA-MMA	Titanium white (0.38 v/v)	1 year	Es	1010	α	0	50	2e-05	Es at 0.5% strain	[#hagan_tensile_2009]
38.11		Golden Artist Colors PBA-MMA	Titanium white (0.38 v/v)	1 year	Es	830	α	20	50	0.02	Es at 0.5% strain	[#hagan_tensile_2009]
38.12		Golden Artist Colors PBA-MMA	Titanium white (0.38 v/v)	1 year	Es	790	α	10	50	0.0002	Es at 0.5% strain	[#hagan_tensile_2009]
38.13		Golden Artist Colors PBA-MMA	Titanium white (0.38 v/v)	1 year	Es	380	α	20	50	0.002	Es at 0.5% strain	[#hagan_tensile_2009]
38.14		Golden Artist Colors PBA-MMA	Titanium white (0.38 v/v)	1 year	Es	320	α	30	50	0.02	Es at 0.5% strain	[#hagan_tensile_2009]
38.15		Golden Artist Colors PBA-MMA	Titanium white (0.38 v/v)	1 year	Es	220	α	20	50	0.0002	Es at 0.5% strain	[#hagan_tensile_2009]
38.16		Golden Artist Colors PBA-MMA	Titanium white (0.38 v/v)	1 year	Es	180	α	30	50	0.002	Es at 0.5% strain	[#hagan_tensile_2009]
38.17		Golden Artist Colors PBA-MMA	Titanium white (0.38 v/v)	1 year	Es	140	α	20	50	2e-05	Es at 0.5% strain	[#hagan_tensile_2009]
38.18		Golden Artist Colors PBA-MMA	Titanium white (0.38 v/v)	1 year	Es	115	α	30	50	0.0002	Es at 0.5% strain	[#hagan_tensile_2009]
38.19		Golden Artist Colors PBA-MMA	Titanium white (0.38 v/v)	1 year	Es	90	α	30	50	2e-05	Es at 0.5% strain	[#hagan_tensile_2009]
35.21		Golden Artist Colors PBA-MMA		1 year	Es	460	α	20	5	0.02	Es at 0.5% strain	[#hagan_tensile_2009]
35.22		Golden Artist Colors PBA-MMA		1 year	Es	210	α	20	5	0.002	Es at 0.5% strain	[#hagan_tensile_2009]
35.23		Golden Artist Colors PBA-MMA		1 year	Es	74	α	30	5	0.02	Es at 0.5% strain	[#hagan_tensile_2009]
35.24		Golden Artist Colors PBA-MMA		1 year	Es	23	α	30	5	0.002	Es at 0.5% strain	[#hagan_tensile_2009]
35.25		Golden Artist Colors PBA-MMA		1 year	Es	19	α	20	5	2e-05	Es at 0.5% strain	[#hagan_tensile_2009]
35.26		Golden Artist Colors PBA-MMA		1 year	Es	5	α	30	5	2e-05	Es at 0.5% strain	[#hagan_tensile_2009]
38.2		Golden Artist Colors PBA-MMA	Titanium white (0.38 v/v)	1 year	Es	2390	α	20	5	0.02	Es at 0.5% strain	[#hagan_tensile_2009]
38.21		Golden Artist Colors PBA-MMA	Titanium white (0.38 v/v)	1 year	Es	1240	α	20	5	0.002	Es at 0.5% strain	[#hagan_tensile_2009]
38.22		Golden Artist Colors PBA-MMA	Titanium white (0.38 v/v)	1 year	Es	840	α	20	5	0.0002	Es at 0.5% strain	[#hagan_tensile_2009]
38.23		Golden Artist Colors PBA-MMA	Titanium white (0.38 v/v)	1 year	Es	730	α	20	5	2e-05	Es at 0.5% strain	[#hagan_tensile_2009]
38.24		Golden Artist Colors PBA-MMA	Titanium white (0.38 v/v)	1 year	Es	460	α	30	5	0.0002	Es at 0.5% strain	[#hagan_tensile_2009]
38.25		Golden Artist Colors PBA-MMA	Titanium white (0.38 v/v)	1 year	Es	410	α	30	5	2e-05	Es at 0.5% strain	[#hagan_tensile_2009]
39.01		Golden Artist Colors PBA-MMA	kaolin (0.28 v/v)	1 year	Es	4780	α	-10	50	0.02	Es at 0.5% strain	[#hagan_viscoelastic_2010]
39.02		Golden Artist Colors PBA-MMA	kaolin (0.28 v/v)	1 year	Es	3930	α	-10	50	0.002	Es at 0.5% strain	[#hagan_viscoelastic_2010]
39.03		Golden Artist Colors PBA-MMA	kaolin (0.28 v/v)	1 year	Es	3410	α	-10	50	0.0002	Es at 0.5% strain	[#hagan_viscoelastic_2010]
39.04		Golden Artist Colors PBA-MMA	kaolin (0.28 v/v)	1 year	Es	2690	α	-10	50	2e-05	Es at 0.5% strain	[#hagan_viscoelastic_2010]
39.05		Golden Artist Colors PBA-MMA	kaolin (0.28 v/v)	1 year	Es	3460	α	0	50	0.02	Es at 0.5% strain	[#hagan_viscoelastic_2010]
39.06		Golden Artist Colors PBA-MMA	kaolin (0.28 v/v)	1 year	Es	2830	α	0	50	0.002	Es at 0.5% strain	[#hagan_viscoelastic_2010]
39.07		Golden Artist Colors PBA-MMA	kaolin (0.28 v/v)	1 year	Es	1780	α	0	50	0.0002	Es at 0.5% strain	[#hagan_viscoelastic_2010]
39.08		Golden Artist Colors PBA-MMA	kaolin (0.28 v/v)	1 year	Es	1020	α	0	50	2e-05	Es at 0.5% strain	[#hagan_viscoelastic_2010]
39.09		Golden Artist Colors PBA-MMA	kaolin (0.28 v/v)	1 year	Es	2350	α	10	50	0.02	Es at 0.5% strain	[#hagan_viscoelastic_2010]
39.1		Golden Artist Colors PBA-MMA	kaolin (0.28 v/v)	1 year	Es	1460	α	10	50	0.002	Es at 0.5% strain	[#hagan_viscoelastic_2010]
39.11		Golden Artist Colors PBA-MMA	kaolin (0.28 v/v)	1 year	Es	790	α	10	50	0.0002	Es at 0.5% strain	[#hagan_viscoelastic_2010]
39.12		Golden Artist Colors PBA-MMA	kaolin (0.28 v/v)	1 year	Es	810	α	20	50	0.02	Es at 0.5% strain	[#hagan_viscoelastic_2010]
39.13		Golden Artist Colors PBA-MMA	kaolin (0.28 v/v)	1 year	Es	370	α	20	50	0.002	Es at 0.5% strain	[#hagan_viscoelastic_2010]
39.14		Golden Artist Colors PBA-MMA	kaolin (0.28 v/v)	1 year	Es	210	α	20	50	0.0002	Es at 0.5% strain	[#hagan_viscoelastic_2010]
39.15		Golden Artist Colors PBA-MMA	kaolin (0.28 v/v)	1 year	Es	130	α	20	50	2e-05	Es at 0.5% strain	[#hagan_viscoelastic_2010]
39.16		Golden Artist Colors PBA-MMA	kaolin (0.28 v/v)	1 year	Es	320	α	30	50	0.02	Es at 0.5% strain	[#hagan_viscoelastic_2010]
39.17		Golden Artist Colors PBA-MMA	kaolin (0.28 v/v)	1 year	Es	170	α	30	50	0.002	Es at 0.5% strain	[#hagan_viscoelastic_2010]
39.18		Golden Artist Colors PBA-MMA	kaolin (0.28 v/v)	1 year	Es	110	α	30	50	0.0002	Es at 0.5% strain	[#hagan_viscoelastic_2010]
39.19		Golden Artist Colors PBA-MMA	kaolin (0.28 v/v)	1 year	Es	90	α	30	50	2e-05	Es at 0.5% strain	[#hagan_viscoelastic_2010]
40.01		Golden Artist Colors PBA-MMA	kaolin (0.15 v/v)	1 year	Es	3410	α	-10	50	0.02	Es at 0.5% strain	[#hagan_viscoelastic_2010]
40.02		Golden Artist Colors PBA-MMA	kaolin (0.15 v/v)	1 year	Es	2880	α	-10	50	0.002	Es at 0.5% strain	[#hagan_viscoelastic_2010]
40.03		Golden Artist Colors PBA-MMA	kaolin (0.15 v/v)	1 year	Es	2580	α	0	50	0.02	Es at 0.5% strain	[#hagan_viscoelastic_2010]
40.04		Golden Artist Colors PBA-MMA	kaolin (0.15 v/v)	1 year	Es	2280	α	-10	50	0.0002	Es at 0.5% strain	[#hagan_viscoelastic_2010]
40.05		Golden Artist Colors PBA-MMA	kaolin (0.15 v/v)	1 year	Es	1960	α	0	50	0.002	Es at 0.5% strain	[#hagan_viscoelastic_2010]
40.06		Golden Artist Colors PBA-MMA	kaolin (0.15 v/v)	1 year	Es	1860	α	-10	50	2e-05	Es at 0.5% strain	[#hagan_viscoelastic_2010]
40.07		Golden Artist Colors PBA-MMA	kaolin (0.15 v/v)	1 year	Es	1510	α	10	50	0.02	Es at 0.5% strain	[#hagan_viscoelastic_2010]
40.08		Golden Artist Colors PBA-MMA	kaolin (0.15 v/v)	1 year	Es	1270	α	0	50	0.0002	Es at 0.5% strain	[#hagan_viscoelastic_2010]
40.09		Golden Artist Colors PBA-MMA	kaolin (0.15 v/v)	1 year	Es	820	α	10	50	0.002	Es at 0.5% strain	[#hagan_viscoelastic_2010]
40.1		Golden Artist Colors PBA-MMA	kaolin (0.15 v/v)	1 year	Es	790	α	0	50	2e-05	Es at 0.5% strain	[#hagan_viscoelastic_2010]
40.11		Golden Artist Colors PBA-MMA	kaolin (0.15 v/v)	1 year	Es	440	α	10	50	0.0002	Es at 0.5% strain	[#hagan_viscoelastic_2010]
40.12		Golden Artist Colors PBA-MMA	kaolin (0.15 v/v)	1 year	Es	450	α	20	50	0.02	Es at 0.5% strain	[#hagan_viscoelastic_2010]
40.13		Golden Artist Colors PBA-MMA	kaolin (0.15 v/v)	1 year	Es	160	α	20	50	0.002	Es at 0.5% strain	[#hagan_viscoelastic_2010]
40.14		Golden Artist Colors PBA-MMA	kaolin (0.15 v/v)	1 year	Es	150	α	10	50	2e-05	Es at 0.5% strain	[#hagan_viscoelastic_2010]
40.15		Golden Artist Colors PBA-MMA	kaolin (0.15 v/v)	1 year	Es	76	α	30	50	0.02	Es at 0.5% strain	[#hagan_viscoelastic_2010]
40.16		Golden Artist Colors PBA-MMA	kaolin (0.15 v/v)	1 year	Es	49	α	20	50	0.0002	Es at 0.5% strain	[#hagan_viscoelastic_2010]
40.17		Golden Artist Colors PBA-MMA	kaolin (0.15 v/v)	1 year	Es	28	α	30	50	0.002	Es at 0.5% strain	[#hagan_viscoelastic_2010]
40.18		Golden Artist Colors PBA-MMA	kaolin (0.15 v/v)	1 year	Es	20	α	20	50	2e-05	Es at 0.5% strain	[#hagan_viscoelastic_2010]
40.19		Golden Artist Colors PBA-MMA	kaolin (0.15 v/v)	1 year	Es	13	α	30	50	0.0002	Es at 0.5% strain	[#hagan_viscoelastic_2010]
40.2		Golden Artist Colors PBA-MMA	kaolin (0.15 v/v)	1 year	Es	9	α	30	50	2e-05	Es at 0.5% strain	[#hagan_viscoelastic_2010]
35.27		Golden Artist Colors PBA-MMA		1 year	Es	1470	α	-10	50	0.02	immersed in water 24 hours, Es at 0.5% strain	[#hagan_viscoelastic_2010]
35.28		Golden Artist Colors PBA-MMA		1 year	Es	1270	α	0	50	0.02	immersed in water 24 hours, Es at 0.5% strain	[#hagan_viscoelastic_2010]
35.29		Golden Artist Colors PBA-MMA		1 year	Es	950	α	0	50	0.002	immersed in water 24 hours, Es at 0.5% strain	[#hagan_viscoelastic_2010]
35.3		Golden Artist Colors PBA-MMA		1 year	Es	680	α	-10	50	2e-05	immersed in water 24 hours, Es at 0.5% strain	[#hagan_viscoelastic_2010]
35.31		Golden Artist Colors PBA-MMA		1 year	Es	660	α	0	50	0.0002	immersed in water 24 hours, Es at 0.5% strain	[#hagan_viscoelastic_2010]
35.32		Golden Artist Colors PBA-MMA		1 year	Es	350	α	10	50	0.002	immersed in water 24 hours, Es at 0.5% strain	[#hagan_viscoelastic_2010]
35.33		Golden Artist Colors PBA-MMA		1 year	Es	130	α	20	50	0.02	immersed in water 24 hours, Es at 0.5% strain	[#hagan_viscoelastic_2010]
35.34		Golden Artist Colors PBA-MMA		1 year	Es	32	α	20	50	0.002	immersed in water 24 hours, Es at 0.5% strain	[#hagan_viscoelastic_2010]
35.35		Golden Artist Colors PBA-MMA		1 year	Es	14	α	30	50	0.02	immersed in water 24 hours, Es at 0.5% strain	[#hagan_viscoelastic_2010]
35.36		Golden Artist Colors PBA-MMA		1 year	Es	10	α	20	50	0.0002	immersed in water 24 hours, Es at 0.5% strain	[#hagan_viscoelastic_2010]
35.37		Golden Artist Colors PBA-MMA		1 year	Es	4	α	30	50	0.002	immersed in water 24 hours, Es at 0.5% strain	[#hagan_viscoelastic_2010]
35.38		Golden Artist Colors PBA-MMA		1 year	Es	3	α	20	50	2e-05	immersed in water 24 hours, Es at 0.5% strain	[#hagan_viscoelastic_2010]
35.39		Golden Artist Colors PBA-MMA		1 year	Es	2	α	30	50	0.0002	immersed in water 24 hours, Es at 0.5% strain	[#hagan_viscoelastic_2010]
36.19		Golden Artist Colors PBA-MMA	Titanium white (0.13 v/v)	1 year	Es	300	α	20	50	0.02	immersed in water 24 hours, Es at 0.5% strain	[#hagan_viscoelastic_2010]
36.2		Golden Artist Colors PBA-MMA	Titanium white (0.13 v/v)	1 year	Es	110	α	20	50	0.002	immersed in water 24 hours, Es at 0.5% strain	[#hagan_viscoelastic_2010]
36.21		Golden Artist Colors PBA-MMA	Titanium white (0.13 v/v)	1 year	Es	45	α	30	50	0.02	immersed in water 24 hours, Es at 0.5% strain	[#hagan_viscoelastic_2010]
36.22		Golden Artist Colors PBA-MMA	Titanium white (0.13 v/v)	1 year	Es	31	α	20	50	0.0002	immersed in water 24 hours, Es at 0.5% strain	[#hagan_viscoelastic_2010]
36.23		Golden Artist Colors PBA-MMA	Titanium white (0.13 v/v)	1 year	Es	14	α	30	50	0.002	immersed in water 24 hours, Es at 0.5% strain	[#hagan_viscoelastic_2010]
36.24		Golden Artist Colors PBA-MMA	Titanium white (0.13 v/v)	1 year	Es	10	α	20	50	2e-05	immersed in water 24 hours, Es at 0.5% strain	[#hagan_viscoelastic_2010]
36.25		Golden Artist Colors PBA-MMA	Titanium white (0.13 v/v)	1 year	Es	5	α	30	50	0.0002	immersed in water 24 hours, Es at 0.5% strain	[#hagan_viscoelastic_2010]
36.26		Golden Artist Colors PBA-MMA	Titanium white (0.13 v/v)	1 year	Es	3	α	30	50	2e-05	immersed in water 24 hours, Es at 0.5% strain	[#hagan_viscoelastic_2010]
37.2		Golden Artist Colors PBA-MMA	Titanium white (0.25 v/v)	1 year	Es	700	α	20	50	0.02	immersed in water 24 hours, Es at 0.5% strain	[#hagan_viscoelastic_2010]
37.21		Golden Artist Colors PBA-MMA	Titanium white (0.25 v/v)	1 year	Es	310	α	20	50	0.002	immersed in water 24 hours, Es at 0.5% strain	[#hagan_viscoelastic_2010]
37.22		Golden Artist Colors PBA-MMA	Titanium white (0.25 v/v)	1 year	Es	180	α	30	50	0.02	immersed in water 24 hours, Es at 0.5% strain	[#hagan_viscoelastic_2010]
37.23		Golden Artist Colors PBA-MMA	Titanium white (0.25 v/v)	1 year	Es	120	α	20	50	0.0002	immersed in water 24 hours, Es at 0.5% strain	[#hagan_viscoelastic_2010]
37.24		Golden Artist Colors PBA-MMA	Titanium white (0.25 v/v)	1 year	Es	76	α	30	50	0.002	immersed in water 24 hours, Es at 0.5% strain	[#hagan_viscoelastic_2010]
37.25		Golden Artist Colors PBA-MMA	Titanium white (0.25 v/v)	1 year	Es	60	α	20	50	2e-05	immersed in water 24 hours, Es at 0.5% strain	[#hagan_viscoelastic_2010]
37.26		Golden Artist Colors PBA-MMA	Titanium white (0.25 v/v)	1 year	Es	41	α	30	50	0.0002	immersed in water 24 hours, Es at 0.5% strain	[#hagan_viscoelastic_2010]
37.27		Golden Artist Colors PBA-MMA	Titanium white (0.25 v/v)	1 year	Es	25	α	30	50	2e-05	immersed in water 24 hours, Es at 0.5% strain	[#hagan_viscoelastic_2010]
38.26		Golden Artist Colors PBA-MMA	Titanium white (0.38 v/v)	1 year	Es	1410	α	20	50	0.02	immersed in water 24 hours, Es at 0.5% strain	[#hagan_viscoelastic_2010]
38.27		Golden Artist Colors PBA-MMA	Titanium white (0.38 v/v)	1 year	Es	890	α	20	50	0.002	immersed in water 24 hours, Es at 0.5% strain	[#hagan_viscoelastic_2010]
38.28		Golden Artist Colors PBA-MMA	Titanium white (0.38 v/v)	1 year	Es	620	α	30	50	0.02	immersed in water 24 hours, Es at 0.5% strain	[#hagan_viscoelastic_2010]
38.29		Golden Artist Colors PBA-MMA	Titanium white (0.38 v/v)	1 year	Es	510	α	20	50	0.0002	immersed in water 24 hours, Es at 0.5% strain	[#hagan_viscoelastic_2010]
38.3		Golden Artist Colors PBA-MMA	Titanium white (0.38 v/v)	1 year	Es	350	α	30	50	0.002	immersed in water 24 hours, Es at 0.5% strain	[#hagan_viscoelastic_2010]
38.31		Golden Artist Colors PBA-MMA	Titanium white (0.38 v/v)	1 year	Es	320	α	20	50	2e-05	immersed in water 24 hours, Es at 0.5% strain	[#hagan_viscoelastic_2010]
38.32		Golden Artist Colors PBA-MMA	Titanium white (0.38 v/v)	1 year	Es	250	α	30	50	0.0002	immersed in water 24 hours, Es at 0.5% strain	[#hagan_viscoelastic_2010]
38.33		Golden Artist Colors PBA-MMA	Titanium white (0.38 v/v)	1 year	Es	190	α	30	50	2e-05	immersed in water 24 hours, Es at 0.5% strain	[#hagan_viscoelastic_2010]
41.01		Golden Artist Colors PBA-MMA	Titanium white (0.06 v/v)	1 year	E*	1650	α	-10	50	2e-05	tested in casting direction	[#hagan_michromechanics_2011]
42.01		Golden Artist Colors PBA-MMA	kaolin (0.07 v/v)	1 year	E*	1950	α	-10	50	2e-05	tested in casting direction	[#hagan_michromechanics_2011]
43.01		Golden Artist Colors PBA-MMA	CaCO3 (0.08 v/v)	1 year	E*	1980	α	-10	50	2e-05	tested in casting direction	[#hagan_michromechanics_2011]
43.02		Golden Artist Colors PBA-MMA	CaCO3 (0.08 v/v)	1 year	E*	1710	α	-10	50	2e-05	tested perpendicular to casting direction	[#hagan_michromechanics_2011]
44.01		Golden Artist Colors PBA-MMA	Titanium white (0.13 v/v)	1 year	E*	1920	α	-10	50	2e-05	tested perpendicular to casting direction	[#hagan_michromechanics_2011]
44.02		Golden Artist Colors PBA-MMA	Titanium white (0.13 v/v)	1 year	E*	1960	α	-10	50	2e-05	tested in casting direction	[#hagan_michromechanics_2011]
45.01		Golden Artist Colors PBA-MMA	kaolin (0.14 v/v)	1 year	E*	2450	α	-10	50	2e-05	tested perpendicular to casting direction	[#hagan_michromechanics_2011]
45.02		Golden Artist Colors PBA-MMA	kaolin (0.14 v/v)	1 year	E*	2660	α	-10	50	2e-05	tested in casting direction	[#hagan_michromechanics_2011]
46.01		Golden Artist Colors PBA-MMA	CaCO3 (0.16 v/v)	1 year	E*	2080	α	-10	50	2e-05	tested perpendicular to casting direction	[#hagan_michromechanics_2011]
46.02		Golden Artist Colors PBA-MMA	CaCO3 (0.16 v/v)	1 year	E*	2390	α	-10	50	2e-05	tested in casting direction	[#hagan_michromechanics_2011]
47.01		Golden Artist Colors PBA-MMA	Titanium white (0.20 v/v)	1 year	E*	2220	α	-10	50	2e-05	tested perpendicular to casting direction	[#hagan_michromechanics_2011]
47.02		Golden Artist Colors PBA-MMA	Titanium white (0.20 v/v)	1 year	E*	2300	α	-10	50	2e-05	tested in casting direction	[#hagan_michromechanics_2011]
48.01		Golden Artist Colors PBA-MMA	kaolin (0.22 v/v)	1 year	E*	3100	α	-10	50	2e-05	tested perpendicular to casting direction	[#hagan_michromechanics_2011]
48.02		Golden Artist Colors PBA-MMA	kaolin (0.22 v/v)	1 year	E*	3520	α	-10	50	2e-05	tested in casting direction	[#hagan_michromechanics_2011]
49.01		Golden Artist Colors PBA-MMA	CaCO3 (0.24 v/v)	1 year	E*	2440	α	-10	50	2e-05	tested perpendicular to casting direction	[#hagan_michromechanics_2011]
49.02		Golden Artist Colors PBA-MMA	CaCO3 (0.24 v/v)	1 year	E*	3030	α	-10	50	2e-05	tested in casting direction	[#hagan_michromechanics_2011]
50.01		Golden Artist Colors PBA-MMA	Titanium white (0.25 v/v)	1 year	E*	2670	α	-10	50	2e-05	tested perpendicular to casting direction	[#hagan_michromechanics_2011]
50.02		Golden Artist Colors PBA-MMA	Titanium white (0.25 v/v)	1 year	E*	2760	α	-10	50	2e-05	tested in casting direction	[#hagan_michromechanics_2011]
51.01		Golden Artist Colors PBA-MMA	kaolin (0.28 v/v)	1 year	E*	4050	α	-10	50	2e-05	tested in casting direction	[#hagan_michromechanics_2011]
52.01		Golden Artist Colors PBA-MMA	CaCO3 (0.30 v/v)	1 year	E*	2990	α	-10	50	2e-05	tested perpendicular to casting direction	[#hagan_michromechanics_2011]
52.02		Golden Artist Colors PBA-MMA	CaCO3 (0.30 v/v)	1 year	E*	3850	α	-10	50	2e-05	tested in casting direction	[#hagan_michromechanics_2011]
53.01		Golden Artist Colors PBA-MMA	Titanium white (0.32 v/v)	1 year	E*	3310	α	-10	50	2e-05	tested perpendicular to casting direction	[#hagan_michromechanics_2011]
53.02		Golden Artist Colors PBA-MMA	Titanium white (0.32 v/v)	1 year	E*	3430	α	-10	50	2e-05	tested in casting direction	[#hagan_michromechanics_2011]
54.01		Golden Artist Colors PBA-MMA	CaCO3 (0.38 v/v)	1 year	E*	3590	α	-10	50	2e-05	tested perpendicular to casting direction	[#hagan_michromechanics_2011]
54.01		Golden Artist Colors PBA-MMA	CaCO3 (0.38 v/v)	1 year	E*	4500	α	-10	50	2e-05	tested in casting direction	[#hagan_michromechanics_2011]
55.01		Golden Artist Colors PBA-MMA	Titanium white (0.38 v/v)	1 year	E*	3530	α	-10	50	2e-05	tested perpendicular to casting direction	[#hagan_michromechanics_2011]
55.02		Golden Artist Colors PBA-MMA	Titanium white (0.38 v/v)	1 year	E*	3790	α	-10	50	2e-05	tested in casting direction	[#hagan_michromechanics_2011]
56.01		Liquitex Heavy Body	Burnt Umber	1-2 years	Es	34	α	23	55		Es at 1% strain	[#domenech-carbo_multitechnique_2013]
56.02		Liquitex Heavy Body	Burnt Umber	1-2 years	Es	250	α	23	55		Immersed in ethanol 20 min, Dried 1 month, Es at 1% strain	[#domenech-carbo_multitechnique_2013]
56.03		Liquitex Heavy Body	Burnt Umber	1-2 years	Es	330	α	23	55		Immersed in acetone 12 hours, Dried 1 month, Es at 1% strain	[#domenech-carbo_multitechnique_2013]
56.04		Liquitex Heavy Body	Burnt Umber	1-2 years	Es	110	α	23	55		Immersed in water 20 min, Dried 1 month, Es at 1% strain	[#domenech-carbo_multitechnique_2013]
56.05		Liquitex Heavy Body	Burnt Umber	1-2 years	Es	250	α	23	55		Immersed in ethanol 12 hours, Dried 1 month, Es at 1% strain	[#domenech-carbo_multitechnique_2013]
56.06		Liquitex Heavy Body	Burnt Umber	1-2 years	Es	250	α	23	55		Immersed in water 12 hours, Dried 1 month, Es at 1% strain	[#domenech-carbo_multitechnique_2013]
57.01		Liquitex Heavy Body	Phthalocyanine Blue	1-2 years	Es	4	α	23	55		Es at 5% strain	[#domenech-carbo_multitechnique_2013]
57.02		Liquitex Heavy Body	Phthalocyanine Blue	1-2 years	Es	4	α	23	55		Immersed in water 10 min, Dried 1 month, Es at 5% strain	[#domenech-carbo_multitechnique_2013]
57.03		Liquitex Heavy Body	Phthalocyanine Blue	1-2 years	Es	13	α	23	55		Immersed in water 20 min, Dried 1 month, Es at 5% strain	[#domenech-carbo_multitechnique_2013]
57.04		Liquitex Heavy Body	Phthalocyanine Blue	1-2 years	Es	25	α	23	55		Immersed in water 12 hours, Dried 1 month, Es at 5% strain	[#domenech-carbo_multitechnique_2013]
57.05		Liquitex Heavy Body	Phthalocyanine Blue	1-2 years	Es	34	α	23	55		Immersed in ethanol 20 min, Dried 1 month, Es at 5% strain	[#domenech-carbo_multitechnique_2013]
57.06		Liquitex Heavy Body	Phthalocyanine Blue	1-2 years	Es	79	α	23	55		Immersed in ethanol 12 hours, Dried 1 month, Es at 5% strain	[#domenech-carbo_multitechnique_2013]
57.07		Liquitex Heavy Body	Phthalocyanine Blue	1-2 years	Es	96	α	23	55		Immersed in acetone 20 min, Dried 1 month, Es at 5% strain	[#domenech-carbo_multitechnique_2013]
57.08		Liquitex Heavy Body	Phthalocyanine Blue	1-2 years	Es	170	α	23	55		Immersed in acetone 12 hours, Dried 1 month, Es at 3% strain	[#domenech-carbo_multitechnique_2013]
58.01		Talens	Raw Sienna	1-2 years	Es	23	α	23	55		Es at 5% strain	[#domenech-carbo_multitechnique_2013]
58.02		Talens	Raw Sienna	1-2 years	Es	30	α	23	55		Immersed in water 5 min, Dried 1 month, Es at 5% strain	[#domenech-carbo_multitechnique_2013]
58.03		Talens	Raw Sienna	1-2 years	Es	42	α	23	55		Immersed in water 20 min, Dried 1 month, Es at 5% strain	[#domenech-carbo_multitechnique_2013]
58.04		Talens	Raw Sienna	1-2 years	Es	23	α	23	55		Swabbed with water 5 min, Dried 1 month, Es at 5% strain	[#domenech-carbo_multitechnique_2013]
58.05		Talens	Raw Sienna	1-2 years	Es	30	α	23	55		Swabbed with water 20 min, Dried 1 month, Es at 5% strain	[#domenech-carbo_multitechnique_2013]
58.06		Talens	Raw Sienna	1-2 years	Es	23	α	23	55		Immersed in ligroin 30 min, Dried 1 month, Es at 5% strain	[#domenech-carbo_multitechnique_2013]
58.07		Talens	Raw Sienna	1-2 years	Es	23	α	23	55		Immersed in mineral spirits 30 min, Dried 1 month, Es at 5% strain	[#domenech-carbo_multitechnique_2013]
58.08		Talens	Raw Sienna	1-2 years	Es	23	α	23	55		Immersed in mineral spirits/water emulsion 30 min, Dried 1 month, Es at 5% strain	[#domenech-carbo_multitechnique_2013]
58.09		Talens	Raw Sienna	1-2 years	Es	30	α	23	55		Exposed to Vanzan gel 30 min, Dried 1 month, Es at 5% strain	[#domenech-carbo_multitechnique_2013]
58.1		Talens	Raw Sienna	1-2 years	Es	30	α	23	55		Exposed to Vanzan gel 30 min, Swabbed with water 30 sec, Dried 1 month, Es at 5% strain	[#domenech-carbo_multitechnique_2013]
58.11		Talens	Raw Sienna	1-2 years	Es	40	α	23	55		Swabbed with water 30 min, Dried 1 month, Es at 5% strain	[#domenech-carbo_multitechnique_2013]
59.01		Liquitex ground (PBA-MMA)	TiO2/CaCO3/talc	1 year	Es	4800	α	-10	50	0.0002	Es at 0.5% strain	[#hagan_effects_2015]
59.02		Liquitex ground (PBA-MMA)	TiO2/CaCO3/talc	1 year	Es	3600	α	-10	50	2e-05	Es at 0.5% strain	[#hagan_effects_2015]
59.03		Liquitex ground (PBA-MMA)	TiO2/CaCO3/talc	1 year	Es	5240	α	0	50	0.02	Es at 0.5% strain	[#hagan_effects_2015]
59.04		Liquitex ground (PBA-MMA)	TiO2/CaCO3/talc	1 year	Es	4000	α	0	50	0.002	Es at 0.5% strain	[#hagan_effects_2015]
59.05		Liquitex ground (PBA-MMA)	TiO2/CaCO3/talc	1 year	Es	2580	α	0	50	0.0002	Es at 0.5% strain	[#hagan_effects_2015]
59.06		Liquitex ground (PBA-MMA)	TiO2/CaCO3/talc	1 year	Es	1510	α	0	50	2e-05	Es at 0.5% strain	[#hagan_effects_2015]
59.07		Liquitex ground (PBA-MMA)	TiO2/CaCO3/talc	1 year	Es	3460	α	10	50	0.02	Es at 0.5% strain	[#hagan_effects_2015]
59.08		Liquitex ground (PBA-MMA)	TiO2/CaCO3/talc	1 year	Es	2030	α	10	50	0.002	Es at 0.5% strain	[#hagan_effects_2015]
59.09		Liquitex ground (PBA-MMA)	TiO2/CaCO3/talc	1 year	Es	980	α	10	50	0.0002	Es at 0.5% strain	[#hagan_effects_2015]
59.1		Liquitex ground (PBA-MMA)	TiO2/CaCO3/talc	1 year	Es	430	α	10	50	2e-05	Es at 0.5% strain	[#hagan_effects_2015]
59.11		Liquitex ground (PBA-MMA)	TiO2/CaCO3/talc	1 year	Es	1000	α	20	50	0.02	Es at 0.5% strain	[#hagan_effects_2015]
59.12		Liquitex ground (PBA-MMA)	TiO2/CaCO3/talc	1 year	Es	440	α	20	50	0.002	Es at 0.5% strain	[#hagan_effects_2015]
59.13		Liquitex ground (PBA-MMA)	TiO2/CaCO3/talc	1 year	Es	170	α	20	50	0.0002	Es at 0.5% strain	[#hagan_effects_2015]
59.14		Liquitex ground (PBA-MMA)	TiO2/CaCO3/talc	1 year	Es	80	α	20	50	2e-05	Es at 0.5% strain	[#hagan_effects_2015]
59.15		Liquitex ground (PBA-MMA)	TiO2/CaCO3/talc	1 year	Es	360	α	30	50	0.02	Es at 0.5% strain	[#hagan_effects_2015]
59.16		Liquitex ground (PBA-MMA)	TiO2/CaCO3/talc	1 year	Es	140	α	30	50	0.002	Es at 0.5% strain	[#hagan_effects_2015]
59.17		Liquitex ground (PBA-MMA)	TiO2/CaCO3/talc	1 year	Es	70	α	30	50	0.0002	Es at 0.5% strain	[#hagan_effects_2015]
59.18		Liquitex ground (PBA-MMA)	TiO2/CaCO3/talc	1 year	Es	40	α	30	50	2e-05	Es at 0.5% strain	[#hagan_effects_2015]
60.01		Golden Artist Colors	Raw Umber	1 year	Es	4870	α	-10	50	0.02	Es at 0.5% strain	[#hagan_effects_2015]
60.02		Golden Artist Colors	Raw Umber	1 year	Es	4400	α	-10	50	0.002	Es at 0.5% strain	[#hagan_effects_2015]
60.03		Golden Artist Colors	Raw Umber	1 year	Es	3350	α	-10	50	0.0002	Es at 0.5% strain	[#hagan_effects_2015]
60.04		Golden Artist Colors	Raw Umber	1 year	Es	2860	α	-10	50	2e-05	Es at 0.5% strain	[#hagan_effects_2015]
60.05		Golden Artist Colors	Raw Umber	1 year	Es	4160	α	0	50	0.02	Es at 0.5% strain	[#hagan_effects_2015]
60.06		Golden Artist Colors	Raw Umber	1 year	Es	3310	α	0	50	0.002	Es at 0.5% strain	[#hagan_effects_2015]
60.07		Golden Artist Colors	Raw Umber	1 year	Es	2520	α	0	50	0.0002	Es at 0.5% strain	[#hagan_effects_2015]
60.08		Golden Artist Colors	Raw Umber	1 year	Es	2780	α	10	50	0.02	Es at 0.5% strain	[#hagan_effects_2015]
60.09		Golden Artist Colors	Raw Umber	1 year	Es	1940	α	10	50	0.002	Es at 0.5% strain	[#hagan_effects_2015]
60.1		Golden Artist Colors	Raw Umber	1 year	Es	1200	α	10	50	0.0002	Es at 0.5% strain	[#hagan_effects_2015]
60.11		Golden Artist Colors	Raw Umber	1 year	Es	600	α	10	50	2e-05	Es at 0.5% strain	[#hagan_effects_2015]
60.12		Golden Artist Colors	Raw Umber	1 year	Es	1110	α	20	50	0.02	Es at 0.5% strain	[#hagan_effects_2015]
60.13		Golden Artist Colors	Raw Umber	1 year	Es	600	α	20	50	0.002	Es at 0.5% strain	[#hagan_effects_2015]
60.14		Golden Artist Colors	Raw Umber	1 year	Es	300	α	20	50	0.0002	Es at 0.5% strain	[#hagan_effects_2015]
60.15		Golden Artist Colors	Raw Umber	1 year	Es	130	α	20	50	2e-05	Es at 0.5% strain	[#hagan_effects_2015]
60.16		Golden Artist Colors	Raw Umber	1 year	Es	380	α	30	50	0.02	Es at 0.5% strain	[#hagan_effects_2015]
60.17		Golden Artist Colors	Raw Umber	1 year	Es	170	α	30	50	0.002	Es at 0.5% strain	[#hagan_effects_2015]
60.18		Golden Artist Colors	Raw Umber	1 year	Es	85	α	30	50	0.0002	Es at 0.5% strain	[#hagan_effects_2015]
60.19		Golden Artist Colors	Raw Umber	1 year	Es	55	α	30	50	2e-05	Es at 0.5% strain	[#hagan_effects_2015]
61.01		Speedball	Raw Umber	27 years	Es	3880	α	-10	50	0.02	Es at 0.5% strain	[#hagan_effects_2015]
61.02		Speedball	Raw Umber	27 years	Es	3600	α	-10	50	0.002	Es at 0.5% strain	[#hagan_effects_2015]
61.03		Speedball	Raw Umber	27 years	Es	3270	α	-10	50	0.0002	Es at 0.5% strain	[#hagan_effects_2015]
61.04		Speedball	Raw Umber	27 years	Es	2520	α	-10	50	2e-05	Es at 0.5% strain	[#hagan_effects_2015]
61.05		Speedball	Raw Umber	27 years	Es	3380	α	0	50	0.02	Es at 0.5% strain	[#hagan_effects_2015]
61.06		Speedball	Raw Umber	27 years	Es	2780	α	0	50	0.002	Es at 0.5% strain	[#hagan_effects_2015]
61.07		Speedball	Raw Umber	27 years	Es	2170	α	0	50	0.0002	Es at 0.5% strain	[#hagan_effects_2015]
61.08		Speedball	Raw Umber	27 years	Es	1270	α	0	50	2e-05	Es at 0.5% strain	[#hagan_effects_2015]
61.09		Speedball	Raw Umber	27 years	Es	2380	α	10	50	0.02	Es at 0.5% strain	[#hagan_effects_2015]
61.1		Speedball	Raw Umber	27 years	Es	1440	α	10	50	0.002	Es at 0.5% strain	[#hagan_effects_2015]
61.11		Speedball	Raw Umber	27 years	Es	660	α	10	50	0.0002	Es at 0.5% strain	[#hagan_effects_2015]
61.12		Speedball	Raw Umber	27 years	Es	260	α	10	50	2e-05	Es at 0.5% strain	[#hagan_effects_2015]
61.13		Speedball	Raw Umber	27 years	Es	540	α	20	50	0.02	Es at 0.5% strain	[#hagan_effects_2015]
61.14		Speedball	Raw Umber	27 years	Es	190	α	20	50	0.002	Es at 0.5% strain	[#hagan_effects_2015]
61.15		Speedball	Raw Umber	27 years	Es	82	α	20	50	0.0002	Es at 0.5% strain	[#hagan_effects_2015]
61.16		Speedball	Raw Umber	27 years	Es	45	α	20	50	2e-05	Es at 0.5% strain	[#hagan_effects_2015]
61.17		Speedball	Raw Umber	27 years	Es	110	α	30	50	0.02	Es at 0.5% strain	[#hagan_effects_2015]
61.18		Speedball	Raw Umber	27 years	Es	59	α	30	50	0.002	Es at 0.5% strain	[#hagan_effects_2015]
61.19		Speedball	Raw Umber	27 years	Es	34	α	30	50	0.0002	Es at 0.5% strain	[#hagan_effects_2015]
61.2		Speedball	Raw Umber	27 years	Es	23	α	30	50	2e-05	Es at 0.5% strain	[#hagan_effects_2015]
62.01		Liquitex	Burnt Umber	27 years	Es	3530	α	-10	50	0.0002	Es at 0.5% strain	[#hagan_effects_2015]
62.02		Liquitex	Burnt Umber	27 years	Es	2800	α	-10	50	2e-05	Es at 0.5% strain	[#hagan_effects_2015]
62.03		Liquitex	Burnt Umber	27 years	Es	3590	α	0	50	0.02	Es at 0.5% strain	[#hagan_effects_2015]
62.04		Liquitex	Burnt Umber	27 years	Es	3210	α	0	50	0.002	Es at 0.5% strain	[#hagan_effects_2015]
62.05		Liquitex	Burnt Umber	27 years	Es	2650	α	0	50	0.0002	Es at 0.5% strain	[#hagan_effects_2015]
62.06		Liquitex	Burnt Umber	27 years	Es	1900	α	0	50	2e-05	Es at 0.5% strain	[#hagan_effects_2015]
62.07		Liquitex	Burnt Umber	27 years	Es	2700	α	10	50	0.02	Es at 0.5% strain	[#hagan_effects_2015]
62.08		Liquitex	Burnt Umber	27 years	Es	1820	α	10	50	0.002	Es at 0.5% strain	[#hagan_effects_2015]
62.09		Liquitex	Burnt Umber	27 years	Es	1270	α	10	50	0.0002	Es at 0.5% strain	[#hagan_effects_2015]
62.1		Liquitex	Burnt Umber	27 years	Es	630	α	10	50	2e-05	Es at 0.5% strain	[#hagan_effects_2015]
62.11		Liquitex	Burnt Umber	27 years	Es	960	α	20	50	0.02	Es at 0.5% strain	[#hagan_effects_2015]
62.12		Liquitex	Burnt Umber	27 years	Es	460	α	20	50	0.002	Es at 0.5% strain	[#hagan_effects_2015]
62.13		Liquitex	Burnt Umber	27 years	Es	280	α	20	50	0.0002	Es at 0.5% strain	[#hagan_effects_2015]
62.14		Liquitex	Burnt Umber	27 years	Es	140	α	20	50	2e-05	Es at 0.5% strain	[#hagan_effects_2015]
62.15		Liquitex	Burnt Umber	27 years	Es	340	α	30	50	0.02	Es at 0.5% strain	[#hagan_effects_2015]
62.16		Liquitex	Burnt Umber	27 years	Es	180	α	30	50	0.002	Es at 0.5% strain	[#hagan_effects_2015]
62.17		Liquitex	Burnt Umber	27 years	Es	120	α	30	50	0.0002	Es at 0.5% strain	[#hagan_effects_2015]
62.18		Liquitex	Burnt Umber	27 years	Es	100	α	30	50	2e-05	Es at 0.5% strain	[#hagan_effects_2015]

## Sheet: Fillers
Sample ID	Support	Binding Medium/Brand	Pigment	Aging Time	Type of Mechanical Property	Mechanical Property (MPa)	αEstimated from Graph βEstimated from Stiffness	Temperature (°C)	Relative Humidity (%)	Strain Rate (s-1)	Other testing conditions	Reference (BibTex)
1.01		Björn skin glue	Calcium Carbonate (75% PVC)	1 day	σT	2.1	α	22	12			[#fuster-lopez_filling_2008]
1.02		Björn skin glue	Calcium Carbonate (75% PVC)	1 day	σT	1.8	α	22	53			[#fuster-lopez_filling_2008]
1.03		Björn skin glue	Calcium Carbonate (75% PVC)	1 day	σT	0.28	α	22	81			[#fuster-lopez_filling_2008]
1.04		Björn skin glue	Calcium Carbonate (75% PVC)	1 day	σT	0	α	22	90			[#fuster-lopez_filling_2008]
2.01		Björn skin glue	Calcium Carbonate (68% PVC)	1 day	σT	4.1	α	22	12			[#fuster-lopez_filling_2008]
2.02		Björn skin glue	Calcium Carbonate (68% PVC)	1 day	σT	3.4	α	22	67			[#fuster-lopez_filling_2008]
2.03		Björn skin glue	Calcium Carbonate (68% PVC)	1 day	σT	0.98	α	22	87			[#fuster-lopez_filling_2008]
2.04		Björn skin glue	Calcium Carbonate (68% PVC)	1 day	σT	0	α	22	93			[#fuster-lopez_filling_2008]
3.01		Björn skin glue	Calcium Carbonate	1 day	σT	5.4	α	22	15.6			[#fuster-lopez_filling_2008]
3.02		Björn skin glue	Calcium Carbonate	1 day	σT	5.1	α	22	48.7			[#fuster-lopez_filling_2008]
3.03		Björn skin glue	Calcium Carbonate	1 day	σT	0.72	α	22	84.1			[#fuster-lopez_filling_2008]
4.01		Björn skin glue	Calcium Carbonate & Molasses (17%)	1 day	σT	5.7	α	22	17			[#fuster-lopez_filling_2008]
4.02		Björn skin glue	Calcium Carbonate & Molasses (17%)	1 day	σT	3.3	α	22	55.1			[#fuster-lopez_filling_2008]
4.03		Björn skin glue	Calcium Carbonate & Molasses (17%)	1 day	σT	0.33	α	22	84.4			[#fuster-lopez_filling_2008]
5.01		Colletta filler		1 day	σT	3.6	α	22	11.2			[#fuster-lopez_filling_2008]
5.02		Colletta filler		1 day	σT	2.6	α	22	48			[#fuster-lopez_filling_2008]
5.03		Colletta filler		1 day	σT	0.93	α	22	80.7			[#fuster-lopez_filling_2008]
5.04		Colletta filler		1 day	σT	0.14	α	22	96			[#fuster-lopez_filling_2008]
6.01		Mowiol #9 filler		1 day	σT	2.7	α	22	48			[#fuster-lopez_filling_2008]
7.01		Modostuc		1 day	σT	0.24	α	22	48			[#fuster-lopez_filling_2008]
8.01		Gesso: Rabbit Skin Glue	Ground Chalk (92% PVC)		E	7020	α	22	51	3.3e-05		[#krzemien_mechanism_2016]
8.02		Gesso: Rabbit Skin Glue	Ground Chalk (92% PVC)		E	7000	α	22	54	3.3e-05		[#krzemien_mechanism_2016]
8.03		Gesso: Rabbit Skin Glue	Ground Chalk (92% PVC)		E	6890	α	22	60	3.3e-05		[#krzemien_mechanism_2016]
8.04		Gesso: Rabbit Skin Glue	Ground Chalk (92% PVC)		E	6660	α	22	65	3.3e-05		[#krzemien_mechanism_2016]
8.05		Gesso: Rabbit Skin Glue	Ground Chalk (92% PVC)		E	6140	α	22	70	3.3e-05		[#krzemien_mechanism_2016]
8.06		Gesso: Rabbit Skin Glue	Ground Chalk (92% PVC)		E	4890	α	22	75	3.3e-05		[#krzemien_mechanism_2016]
8.07		Gesso: Rabbit Skin Glue	Ground Chalk (92% PVC)		E	2930	α	22	79	3.3e-05		[#krzemien_mechanism_2016]
8.08		Gesso: Rabbit Skin Glue	Ground Chalk (92% PVC)		E	1890	α	22	84	3.3e-05		[#krzemien_mechanism_2016]
8.09		Gesso: Rabbit Skin Glue	Ground Chalk (92% PVC)		E	1260	α	22	88	3.3e-05		[#krzemien_mechanism_2016]
13.01	Linen fabric, 262 g/m2				E	324.2				1.67	Tested at ambient conditions; sample cut in the weft direction	[#penava_experimental_2016]
13.02	Linen fabric, 262 g/m3				E	146.6				1.67	Tested at ambient conditions; sample cut at a 15° angle to the weft direction.	[#penava_experimental_2016]
13.03	Linen fabric, 262 g/m4				E	59.8				1.67	Tested at ambient conditions; sample cut at a 30° angle to the weft direction.	[#penava_experimental_2016]
13.04	Linen fabric, 262 g/m5				E	76.6				1.67	Tested at ambient conditions; sample cut at a 45° angle to the weft direction.	[#penava_experimental_2016]
13.05	Linen fabric, 262 g/m6				E	56.8				1.67	Tested at ambient conditions; sample cut at a 60° angle to the weft direction.	[#penava_experimental_2016]
13.06	Linen fabric, 262 g/m7				E	150.4				1.67	Tested at ambient conditions; sample cut at a 75° angle to the weft direction.	[#penava_experimental_2016]
13.07	Linen fabric, 262 g/m8				E	171.7				1.67	Tested at ambient conditions; sample cut in the warp direction.	[#penava_experimental_2016]
14.01	Linen fabric, 262 g/m2	Animal Skin Glue (7%)	Champagne-chalk, titanium white		E	5098.2				1.67	One layer of sizing (animal skin glue) and one layer of the ground applied; tested at ambient conditions; sample cut in the weft direction	[#penava_experimental_2016]
14.02	Linen fabric, 262 g/m2	Animal Skin Glue (7%)	Champagne-chalk, titanium white		E	4421.6				1.67	One layer of sizing (animal skin glue) and one layer of the ground applied; tested at ambient conditions; sample cut at a 15° angle to the weft direction.	[#penava_experimental_2016]
14.03	Linen fabric, 262 g/m2	Animal Skin Glue (7%)	Champagne-chalk, titanium white		E	3128.5				1.67	One layer of sizing (animal skin glue) and one layer of the ground applied; tested at ambient conditions; sample cut at a 30° angle to the weft direction.	[#penava_experimental_2016]
14.04	Linen fabric, 262 g/m2	Animal Skin Glue (7%)	Champagne-chalk, titanium white		E	4365.9				1.67	One layer of sizing (animal skin glue) and one layer of the ground applied; tested at ambient conditions; sample cut at a 45° angle to the weft direction.	[#penava_experimental_2016]
14.05	Linen fabric, 262 g/m2	Animal Skin Glue (7%)	Champagne-chalk, titanium white		E	3212.7				1.67	One layer of sizing (animal skin glue) and one layer of the ground applied; tested at ambient conditions; sample cut at a 60° angle to the weft direction.	[#penava_experimental_2016]
14.06	Linen fabric, 262 g/m2	Animal Skin Glue (7%)	Champagne-chalk, titanium white		E	3800.2				1.67	One layer of sizing (animal skin glue) and one layer of the ground applied; tested at ambient conditions; sample cut at a 75° angle to the weft direction.	[#penava_experimental_2016]
14.07	Linen fabric, 262 g/m2	Animal Skin Glue (7%)	Champagne-chalk, titanium white		E	4058.7				1.67	One layer of sizing (animal skin glue) and one layer of the ground applied; tested at ambient conditions; sample cut in the warp direction.	[#penava_experimental_2016]
15.01	Linen fabric, 262 g/m2	Animal Skin Glue (7%)	Champagne-chalk, titanium white		E	6116.2				1.67	One layer of sizing (animal skin glue) and two layers of the ground applied; tested at ambient conditions; sample cut in the weft direction	[#penava_experimental_2016]
15.02	Linen fabric, 262 g/m2	Animal Skin Glue (7%)	Champagne-chalk, titanium white		E	5344.6				1.67	One layer of sizing (animal skin glue) and two layers of the ground applied; tested at ambient conditions; sample cut at a 15° angle to the weft direction.	[#penava_experimental_2016]
15.03	Linen fabric, 262 g/m2	Animal Skin Glue (7%)	Champagne-chalk, titanium white		E	5378.5				1.67	One layer of sizing (animal skin glue) and two layers of the ground applied; tested at ambient conditions; sample cut at a 30° angle to the weft direction.	[#penava_experimental_2016]
15.04	Linen fabric, 262 g/m2	Animal Skin Glue (7%)	Champagne-chalk, titanium white		E	5211.3				1.67	One layer of sizing (animal skin glue) and two layers of the ground applied; tested at ambient conditions; sample cut at a 45° angle to the weft direction.	[#penava_experimental_2016]
15.05	Linen fabric, 262 g/m2	Animal Skin Glue (7%)	Champagne-chalk, titanium white		E	4490.2				1.67	One layer of sizing (animal skin glue) and two layers of the ground applied; tested at ambient conditions; sample cut at a 60° angle to the weft direction.	[#penava_experimental_2016]
15.06	Linen fabric, 262 g/m2	Animal Skin Glue (7%)	Champagne-chalk, titanium white		E	4508.5				1.67	One layer of sizing (animal skin glue) and two layers of the ground applied; tested at ambient conditions; sample cut at a 75° angle to the weft direction.	[#penava_experimental_2016]
15.07	Linen fabric, 262 g/m2	Animal Skin Glue (7%)	Champagne-chalk, titanium white		E	4911.2				1.67	One layer of sizing (animal skin glue) and two layers of the ground applied; tested at ambient conditions; sample cut in the warp direction.	[#penava_experimental_2016]
16.01	Linen fabric, 262 g/m2	Animal Skin Glue (7%)	Champagne-chalk, titanium white		E	7279.8				1.67	One layer of sizing (animal skin glue) and three layers of the ground applied; tested at ambient conditions; sample cut in the weft direction	[#penava_experimental_2016]
16.02	Linen fabric, 262 g/m2	Animal Skin Glue (7%)	Champagne-chalk, titanium white		E	7059.2				1.67	One layer of sizing (animal skin glue) and three layers of the ground applied; tested at ambient conditions; sample cut at a 15° angle to the weft direction.	[#penava_experimental_2016]
16.03	Linen fabric, 262 g/m2	Animal Skin Glue (7%)	Champagne-chalk, titanium white		E	6607.5				1.67	One layer of sizing (animal skin glue) and three layers of the ground applied; tested at ambient conditions; sample cut at a 30° angle to the weft direction.	[#penava_experimental_2016]
16.04	Linen fabric, 262 g/m2	Animal Skin Glue (7%)	Champagne-chalk, titanium white		E	5986.2				1.67	One layer of sizing (animal skin glue) and three layers of the ground applied; tested at ambient conditions; sample cut at a 45° angle to the weft direction.	[#penava_experimental_2016]
16.05	Linen fabric, 262 g/m2	Animal Skin Glue (7%)	Champagne-chalk, titanium white		E	5421.1				1.67	One layer of sizing (animal skin glue) and three layers of the ground applied; tested at ambient conditions; sample cut at a 60° angle to the weft direction.	[#penava_experimental_2016]
16.06	Linen fabric, 262 g/m2	Animal Skin Glue (7%)	Champagne-chalk, titanium white		E	5646.9				1.67	One layer of sizing (animal skin glue) and three layers of the ground applied; tested at ambient conditions; sample cut at a 75° angle to the weft direction.	[#penava_experimental_2016]
16.07	Linen fabric, 262 g/m2	Animal Skin Glue (7%)	Champagne-chalk, titanium white		E	6001.2				1.67	One layer of sizing (animal skin glue) and three layers of the ground applied; tested at ambient conditions; sample cut in the warp direction.	[#penava_experimental_2016]
17.01		Becker's Latexspackle			E	416.3		22	25	1.7		[#doutre_effects_2017]
17.02		Becker's Latexspackle			E	205		22	50	1.7		[#doutre_effects_2017]
17.03		Becker's Latexspackle			E	71.7		22	75	1.7		[#doutre_effects_2017]
18.01		Flugger Spackle			E	388		22	25	1.7		[#doutre_effects_2017]
18.02		Flugger Spackle			E	244.4		22	50	1.7		[#doutre_effects_2017]
18.03		Flugger Spackle			E	35.7		22	75	1.7		[#doutre_effects_2017]
19.01		Golden Acrylic Gesso			E	303.3		22	25	10		[#doutre_effects_2017]
19.02		Golden Acrylic Gesso			E	93.9		22	50	10		[#doutre_effects_2017]
19.03		Golden Acrylic Gesso			E	42.9		22	75	10		[#doutre_effects_2017]
20.01		Liquitex Acrylic Gesso			E	412.2		22	25	10		[#doutre_effects_2017]
20.02		Liquitex Acrylic Gesso			E	57.3		22	50	10		[#doutre_effects_2017]
20.03		Liquitex Acrylic Gesso			E	50.1		22	75	10		[#doutre_effects_2017]
21.01		Rabbit Skin Glue	Calcium Carbonate		E	1511		22	25	1.7		[#doutre_effects_2017]
21.02		Rabbit Skin Glue	Calcium Carbonate		E	1730		22	50	1.7		[#doutre_effects_2017]
21.03		Rabbit Skin Glue	Calcium Carbonate		E	1995		22	75	1.7		[#doutre_effects_2017]
9.01	Modern Cotton canvas, 374 g/m2			3 days degraded	E	1.8		25	20	0.4*	Artificial degradation using HCl and H2O2 solutions for 3 days at 40 °C, samples tested along the warp directions.	[#bridaroli_systematic_2020]
9.02	Modern Cotton canvas, 374 g/m2			3 days degraded	E	1.1		25	80	0.4*	Artificial degradation using HCl and H2O2 solutions for 3 days at 40 °C, samples tested along the warp directions.	[#bridaroli_systematic_2020]
10.01	Modern Cotton canvas, 374 g/m2	Nanofibrillated cellulose in water		3 days degraded	E	23.1		25	20	0.4*	Artificial degradation using HCl and H2O2 solutions for 3 days at 40 °C. 4 layers of consolidant were brush applied, samples tested along the warp directions.	[#bridaroli_systematic_2020]
10.02	Modern Cotton canvas, 374 g/m2	Nanofibrillated cellulose in water		3 days degraded	E	10.2		25	80	0.4*	Artificial degradation using HCl and H2O2 solutions for 3 days at 40 °C. 4 layers of consolidant were brush applied, samples tested along the warp directions.	[#bridaroli_systematic_2020]
11.01	Modern Cotton canvas, 374 g/m2	Animal glue in water		3 days degraded	E	14.3		25	20	0.4*	Artificial degradation using HCl and H2O2 solutions for 3 days at 40 °C. 2 layers of consolidant were brush applied, samples tested along the warp directions.	[#bridaroli_systematic_2020]
11.02	Modern Cotton canvas, 374 g/m2	Animal glue in water		3 days degraded	E	4.4		25	80	0.4*	Artificial degradation using HCl and H2O2 solutions for 3 days at 40 °C. 2 layers of consolidant were brush applied, samples tested along the warp directions.	[#bridaroli_systematic_2020]
12.01	Modern Cotton canvas, 374 g/m2	Beva 371 in white spirits		3 days degraded	E	3.8		25	20	0.4*	Artificial degradation using HCl and H2O2 solutions for 3 days at 40 °C. 4 layers of consolidant were brush applied, samples tested along the warp directions.	[#bridaroli_systematic_2020]
12.02	Modern Cotton canvas, 374 g/m2	Beva 371 in white spirits		3 days degraded	E	3.2		25	80	0.4*	Artificial degradation using HCl and H2O2 solutions for 3 days at 40 °C. 4 layers of consolidant were brush applied, samples tested along the warp directions.	[#bridaroli_systematic_2020]

## Sheet: Fillers-Parse
Column1	Column2	Column3	Column4	Column5	Column6	Column7	Column8	Column9	Column10	Title
Björn skin glue	Calcium Carbonate (75% PVC)	1 day	σT	2.1	α	22	12		[#fuster-lopez_filling_2008]	0
Björn skin glue	Calcium Carbonate (75% PVC)	1 day	σT	1.8	α	22	53		[#fuster-lopez_filling_2008]	1
Björn skin glue	Calcium Carbonate (75% PVC)	1 day	σT	0.28	α	22	81		[#fuster-lopez_filling_2008]	0
Björn skin glue	Calcium Carbonate (75% PVC)	1 day	σT	0	α	22	90		[#fuster-lopez_filling_2008]	1
Björn skin glue	Calcium Carbonate (68% PVC)	1 day	σT	4.1	α	22	12		[#fuster-lopez_filling_2008]	0
Björn skin glue	Calcium Carbonate (68% PVC)	1 day	σT	3.4	α	22	67		[#fuster-lopez_filling_2008]	1
Björn skin glue	Calcium Carbonate (68% PVC)	1 day	σT	0.98	α	22	87		[#fuster-lopez_filling_2008]	0
Björn skin glue	Calcium Carbonate (68% PVC)	1 day	σT	0	α	22	93		[#fuster-lopez_filling_2008]	1
Björn skin glue	Calcium Carbonate	1 day	σT	5.4	α	22	15.6		[#fuster-lopez_filling_2008]	0
Björn skin glue	Calcium Carbonate	1 day	σT	5.1	α	22	48.7		[#fuster-lopez_filling_2008]	1
Björn skin glue	Calcium Carbonate	1 day	σT	0.72	α	22	84.1		[#fuster-lopez_filling_2008]	0
Björn skin glue	Calcium Carbonate & Molasses (17%)	1 day	σT	5.7	α	22	17		[#fuster-lopez_filling_2008]	1
Björn skin glue	Calcium Carbonate & Molasses (17%)	1 day	σT	3.3	α	22	55.1		[#fuster-lopez_filling_2008]	0
Björn skin glue	Calcium Carbonate & Molasses (17%)	1 day	σT	0.33	α	22	84.4		[#fuster-lopez_filling_2008]	1
Colletta filler		1 day	σT	3.6	α	22	11.2		[#fuster-lopez_filling_2008]	0
Colletta filler		1 day	σT	2.6	α	22	48		[#fuster-lopez_filling_2008]	1
Colletta filler		1 day	σT	0.93	α	22	80.7		[#fuster-lopez_filling_2008]	0
Colletta filler		1 day	σT	0.14	α	22	96		[#fuster-lopez_filling_2008]	1
Mowiol #9 filler		1 day	σT	2.7	α	22	48		[#fuster-lopez_filling_2008]	0
Modostuc		1 day	σT	0.24	α	22	48		[#fuster-lopez_filling_2008]	1
Gesso: Rabbit Skin Glue	Ground Chalk (92% PVC)		E	7020	α	22	51	3.3e-05	[#krzemien_mechanism_2016]	0
Gesso: Rabbit Skin Glue	Ground Chalk (92% PVC)		E	7000	α	22	54	3.3e-05	[#krzemien_mechanism_2016]	1
Gesso: Rabbit Skin Glue	Ground Chalk (92% PVC)		E	6890	α	22	60	3.3e-05	[#krzemien_mechanism_2016]	0
Gesso: Rabbit Skin Glue	Ground Chalk (92% PVC)		E	6660	α	22	65	3.3e-05	[#krzemien_mechanism_2016]	1
Gesso: Rabbit Skin Glue	Ground Chalk (92% PVC)		E	6140	α	22	70	3.3e-05	[#krzemien_mechanism_2016]	0
Gesso: Rabbit Skin Glue	Ground Chalk (92% PVC)		E	4890	α	22	75	3.3e-05	[#krzemien_mechanism_2016]	1
Gesso: Rabbit Skin Glue	Ground Chalk (92% PVC)		E	2930	α	22	79	3.3e-05	[#krzemien_mechanism_2016]	0
Gesso: Rabbit Skin Glue	Ground Chalk (92% PVC)		E	1890	α	22	84	3.3e-05	[#krzemien_mechanism_2016]	1
Gesso: Rabbit Skin Glue	Ground Chalk (92% PVC)		E	1260	α	22	88	3.3e-05	[#krzemien_mechanism_2016]	0

## Sheet: Acrylic Parse
Column1	Column2	Column3	Column4	Column5	Column6	Column7	Column8	Column9	Column10	Column11	Column12	Title
		Burnt Sienna	10+ years	E	279		23	50			[#erlebacher_effects_1992]	0
		Burnt Sienna	10+ years	E	1048		23	5			[#erlebacher_effects_1992]	1
		Burnt Sienna	10+ years	E	6425		-6.5	5			[#erlebacher_effects_1992]	0
		Burnt Sienna	10+ years	E	6111		5	5			[#erlebacher_effects_1992]	1
		Burnt Sienna	13 years	Eeq	62.9		23	50		stress relaxation	[#mecklenburg_mechanical_1994]	0
		Burnt Umber	10+ years	E	77		23	50			[#erlebacher_effects_1992]	1
		Burnt Umber	10+ years	E	349		23	5			[#erlebacher_effects_1992]	0
		Burnt Umber	10+ years	E	3981		-8.1	50			[#erlebacher_effects_1992]	1
		Burnt Umber	10+ years	E	1571		5.6	50			[#erlebacher_effects_1992]	0
		Burnt Umber	10+ years	E	17		33.4	50			[#erlebacher_effects_1992]	1
		Cadmium Red	10+ years	E	161		23	50			[#erlebacher_effects_1992]	0
		Cadmium Yellow	10+ years	E	105		23	50			[#erlebacher_effects_1992]	1
		Cadmium Yellow	10+ years	E	475		23	5			[#erlebacher_effects_1992]	0
		Cadmium Yellow	10+ years	E	5517		-6.5	5			[#erlebacher_effects_1992]	1
		Cadmium Yellow	10+ years	E	4470		5	5			[#erlebacher_effects_1992]	0
		Cerulean Blue	10+ years	E	140		23	50			[#erlebacher_effects_1992]	1
		Cerulean Blue	10+ years	E	265		23	5			[#erlebacher_effects_1992]	0
		Cobalt Blue	10+ years	E	314		23	50			[#erlebacher_effects_1992]	1
		Cobalt Blue	10+ years	E	698		23	5			[#erlebacher_effects_1992]	0
		Cobalt Blue	10+ years	E	6495		-8.1	50			[#erlebacher_effects_1992]	1
		Cobalt Blue	10+ years	E	2025		5.6	50			[#erlebacher_effects_1992]	0
		Cobalt Blue	10+ years	E	23		33.4	50			[#erlebacher_effects_1992]	1
		Iron Oxide Red	10+ years	E	279		23	50			[#erlebacher_effects_1992]	0
		Iron Oxide Red	10+ years	E	663		23	5			[#erlebacher_effects_1992]	1
		Ivory Black	10+ years	E	84		23	50			[#erlebacher_effects_1992]	0
		Ivory Black	10+ years	E	279		23	5			[#erlebacher_effects_1992]	1
		Ivory Black	10+ years	E	3413		-4.3	50			[#erlebacher_effects_1992]	0
		Ivory Black	10+ years	E	1467		5.6	50			[#erlebacher_effects_1992]	1
		Ivory Black	10+ years	E	4.75		33.4	50			[#erlebacher_effects_1992]	0
		Raw Sienna	10+ years	E	70		23	50			[#erlebacher_effects_1992]	1
		Raw Sienna	10+ years	E	223		23	5			[#erlebacher_effects_1992]	0
		Titanium White	10+ years	E	147		23	50			[#erlebacher_effects_1992]	1
		Titanium White	10+ years	E	978		23	5			[#erlebacher_effects_1992]	0
		Titanium White	10+ years	E	10476		-6.5	5			[#erlebacher_effects_1992]	1
		Titanium White	10+ years	E	6286		5	5			[#erlebacher_effects_1992]	0
		Titanium White	13 years	Eeq	83.8		23	50			[#mecklenburg_mechanical_1994]	1
	Liquitex gloss medium		10 days	σT	8.7	α	25	40	5	aged in the dark	[#whitmore_natural_1995]	0
	Liquitex gloss medium		10 days	σY	2.2	α	25	40	5	aged in the dark	[#whitmore_natural_1995]	1
	Liquitex gloss medium		36 days	σT	11.7	α	25	40	5	aged in the dark	[#whitmore_natural_1995]	0
	Liquitex gloss medium		36 days	σY	3.6	α	25	40	5	aged in the dark	[#whitmore_natural_1995]	1
	Liquitex gloss medium		65 days	σT	12.2	α	25	40	5	aged in the dark	[#whitmore_natural_1995]	0
	Liquitex gloss medium		65 days	σY	5.9	α	25	40	5	aged in the dark	[#whitmore_natural_1995]	1
	Liquitex gloss medium		72 days	σT	13.1	α	25	40	5	aged in the dark	[#whitmore_natural_1995]	0
	Liquitex gloss medium		72 days	σY	5.8	α	25	40	5	aged in the dark	[#whitmore_natural_1995]	1
	Liquitex gloss medium		120 days	σT	14.0	α	25	40	5	aged in the dark	[#whitmore_natural_1995]	0
	Liquitex gloss medium		120 days	σY	6.8	α	25	40	5	aged in the dark	[#whitmore_natural_1995]	1
	Liquitex gloss medium		153 days	σT	13.7	α	25	40	5	aged in the dark	[#whitmore_natural_1995]	0
	Liquitex gloss medium		153 days	σY	6.4	α	25	40	5	aged in the dark	[#whitmore_natural_1995]	1
	Liquitex gloss medium		167 days	σT	13.9	α	25	40	5	aged in the dark	[#whitmore_natural_1995]	0
	Liquitex gloss medium		167 days	σY	6.2	α	25	40	5	aged in the dark	[#whitmore_natural_1995]	1
	Liquitex gloss medium		569 days	σT	13.8	α	25	40	5	aged in the dark	[#whitmore_natural_1995]	0
	Liquitex gloss medium		569 days	σY	5.3	α	25	40	5	aged in the dark	[#whitmore_natural_1995]	1
	Liquitex gloss medium		0 days of UV-B exposure	σT	12.3	α	23	50	5	aged in the dark 60 days before UV-B exposure	[#whitmore_natural_1995]	0
	Liquitex gloss medium		0 days of UV-B exposure	σY	5.6	α	23	50	5	aged in the dark 60 days before UV-B exposure	[#whitmore_natural_1995]	1
	Liquitex gloss medium		3 days of UV-B exposure	σT	9.6	α	23	50	5	aged in the dark 60 days before UV-B exposure	[#whitmore_natural_1995]	0
	Liquitex gloss medium		3 days of UV-B exposure	σY	4.1	α	23	50	5	aged in the dark 60 days before UV-B exposure	[#whitmore_natural_1995]	1
	Liquitex gloss medium		7 days of UV-B exposure	σT	9.7	α	23	50	5	aged in the dark 60 days before UV-B exposure	[#whitmore_natural_1995]	0
	Liquitex gloss medium		7 days of UV-B exposure	σY	7.1	α	23	50	5	aged in the dark 60 days before UV-B exposure	[#whitmore_natural_1995]	1
	Liquitex gloss medium		20 days of UV-B exposure	σT	9.04	α	23	50	5	aged in the dark 60 days before UV-B exposure	[#whitmore_natural_1995]	0
	Liquitex gloss medium		20 days of UV-B exposure	σY	9.9	α	23	50	5	aged in the dark 60 days before UV-B exposure	[#whitmore_natural_1995]	1
	Liquitex gloss medium		27 days of UV-B exposure	σT	2.6	α	23	50	5	aged in the dark 60 days before UV-B exposure	[#whitmore_natural_1995]	0
	Liquitex gloss medium		27 days of UV-B exposure	σY	2.7	α	23	50	5	aged in the dark 60 days before UV-B exposure	[#whitmore_natural_1995]	1
	Liquitex gloss medium		0 days of UV-A exposure	σT	12.3	α	23	50	5	aged in the dark 60 days before UV-A exposure	[#whitmore_natural_1995]	0
	Liquitex gloss medium		0 days of UV-A exposure	σY	5.6	α	23	50	5	aged in the dark 60 days before UV-A exposure	[#whitmore_natural_1995]	1
	Liquitex gloss medium		20 days of UV-A exposure	σT	9.6	α	23	50	5	aged in the dark 60 days before UV-A exposure	[#whitmore_natural_1995]	0
	Liquitex gloss medium		20 days of UV-A exposure	σY	3.9	α	23	50	5	aged in the dark 60 days before UV-A exposure	[#whitmore_natural_1995]	1
	Liquitex gloss medium		42 days of UV-A exposure	σT	9.3	α	23	50	5	aged in the dark 60 days before UV-A exposure	[#whitmore_natural_1995]	0
	Liquitex gloss medium		42 days of UV-A exposure	σY	4.8	α	23	50	5	aged in the dark 60 days before UV-A exposure	[#whitmore_natural_1995]	1
	Liquitex gloss medium		84 days of UV-A exposure	σT	9.7	α	23	50	5	aged in the dark 60 days before UV-A exposure	[#whitmore_natural_1995]	0
	Liquitex gloss medium		84 days of UV-A exposure	σY	8.0	α	23	50	5	aged in the dark 60 days before UV-A exposure	[#whitmore_natural_1995]	1
	Rhoplex AC-234	Bone Black	7 months	σT	7.4	α	21	20	0.0028		[#hagan_effects_2004]	0
	Rhoplex AC-234	Bone Black	7 months	Es	81.7	α	21	20	0.0028		[#hagan_effects_2004]	1
	Rhoplex AC-234	Bone Black	7 months	σT	5.7	α	21	40	0.0028		[#hagan_effects_2004]	0
	Rhoplex AC-234	Bone Black	7 months	Es	48.9	α	21	40	0.0028		[#hagan_effects_2004]	1
	Rhoplex AC-234	Bone Black	7 months	σT	25		1.5	50	0.0028		[#hagan_effects_2004]	0
	Rhoplex AC-234	Bone Black	7 months	Es	2281		1.5	50	0.0028		[#hagan_effects_2004]	1
	Rhoplex AC-234	Bone Black	7 months	σT	8.4		7.5	50	0.0028		[#hagan_effects_2004]	0
	Rhoplex AC-234	Bone Black	7 months	Es	643		7.5	50	0.0028		[#hagan_effects_2004]	1
	Rhoplex AC-234	Bone Black	2 days	σT	1.8		21	50	0.0028		[#hagan_effects_2004]	0
	Rhoplex AC-234	Bone Black	2 days	Es	9.9		21	50	0.0028		[#hagan_effects_2004]	1
	Rhoplex AC-234	Bone Black	5 months	σT	4.4		21	50	0.0028		[#hagan_effects_2004]	0
	Rhoplex AC-234	Bone Black	5 months	Es	24		21	50	0.0028		[#hagan_effects_2004]	1
	Rhoplex AC-234	Bone Black	7 months	σT	5	α	21	50	0.0028		[#hagan_effects_2004]	0
	Rhoplex AC-234	Bone Black	7 months	Es	31	α	21	50	0.0028		[#hagan_effects_2004]	1
	Rhoplex AC-234	Bone Black	13 months	σT	4.8		21	50	0.0028		[#hagan_effects_2004]	0
	Rhoplex AC-234	Bone Black	13 months	Es	31		21	50	0.0028		[#hagan_effects_2004]	1
	Rhoplex AC-234	Bone Black	7 months	σT	3.2		31	50	0.0028		[#hagan_effects_2004]	0
	Rhoplex AC-234	Bone Black	7 months	Es	19		31	50	0.0028		[#hagan_effects_2004]	1
	Rhoplex AC-234	Bone Black	7 months	σT	4.1	α	21	60	0.0028		[#hagan_effects_2004]	0
	Rhoplex AC-234	Bone Black	7 months	Es	18.8	α	21	60	0.0028		[#hagan_effects_2004]	1
	Rhoplex AC-234	Bone Black	7 months	σT	2.3	α	21	80	0.0028		[#hagan_effects_2004]	0
	Rhoplex AC-234	Bone Black	7 months	Es	6.3	α	21	80	0.0028		[#hagan_effects_2004]	1
	Rhoplex AC-234	Bone Black	7 months	σT	9.1	α	21	20	0.0028	Immersed in water 24 hours, dried 72 hours	[#hagan_effects_2004]	0
	Rhoplex AC-234	Bone Black	7 months	Es	99.5	α	21	20	0.0028	Immersed in water 24 hours, dried 72 hours	[#hagan_effects_2004]	1
	Rhoplex AC-234	Bone Black	7 months	σT	7	α	21	40	0.0028	Immersed in water 24 hours, dried 72 hours	[#hagan_effects_2004]	0
	Rhoplex AC-234	Bone Black	7 months	Es	72.3	α	21	40	0.0028	Immersed in water 24 hours, dried 72 hours	[#hagan_effects_2004]	1
	Rhoplex AC-234	Bone Black	7 months	σT	5.3	α	21	50	0.0028	Immersed in water 15 min, dried 72 hours	[#hagan_effects_2004]	0
	Rhoplex AC-234	Bone Black	7 months	Es	36.7	α	21	50	0.0028	Immersed in water 15 min, dried 72 hours	[#hagan_effects_2004]	1
	Rhoplex AC-234	Bone Black	7 months	σT	5.7	α	21	50	0.0028	Immersed in water 1 hour, dried 72 hours	[#hagan_effects_2004]	0
	Rhoplex AC-234	Bone Black	7 months	Es	42.2	α	21	50	0.0028	Immersed in water 1 hour, dried 72 hours	[#hagan_effects_2004]	1
	Rhoplex AC-234	Bone Black	7 months	σT	6.1	α	21	50	0.0028	Immersed in water 6 hours, dried 72 hours	[#hagan_effects_2004]	0
	Rhoplex AC-234	Bone Black	7 months	Es	50.8	α	21	50	0.0028	Immersed in water 6 hours, dried 72 hours	[#hagan_effects_2004]	1
	Rhoplex AC-234	Bone Black	7 months	σT	6.3	α	21	50	0.0028	Immersed in water 24 hours, dried 72 hours	[#hagan_effects_2004]	0
	Rhoplex AC-234	Bone Black	7 months	Es	53.5	α	21	50	0.0028	Immersed in water 24 hours, dried 72 hours	[#hagan_effects_2004]	1
	Rhoplex AC-234	Bone Black	7 months	σT	5.3	α	21	60	0.0028	Immersed in water 24 hours, dried 72 hours	[#hagan_effects_2004]	0
	Rhoplex AC-234	Bone Black	7 months	Es	40.2		21	60	0.0028	Immersed in water 24 hours, dried 72 hours	[#hagan_effects_2004]	1
	Rhoplex AC-234	Bone Black	7 months	σT	3.7	α	21	80	0.0028	Immersed in water 24 hours, dried 72 hours	[#hagan_effects_2004]	0
	Rhoplex AC-234	Bone Black	7 months	Es	17.4	α	21	80	0.0028	Immersed in water 24 hours, dried 72 hours	[#hagan_effects_2004]	1
	Rhoplex AC-234	Naphthol Red Light	7 months	σT	4.5	α	21	20	0.0028		[#hagan_effects_2004]	0
	Rhoplex AC-234	Naphthol Red Light	7 months	Es	39.4	α	21	20	0.0028		[#hagan_effects_2004]	1
	Rhoplex AC-234	Naphthol Red Light	7 months	σT	3	α	21	40	0.0028		[#hagan_effects_2004]	0
	Rhoplex AC-234	Naphthol Red Light	7 months	Es	22.9	α	21	40	0.0028		[#hagan_effects_2004]	1
	Rhoplex AC-234	Naphthol Red Light	7 months	σT	2.3	α	21	50	0.0028		[#hagan_effects_2004]	0
	Rhoplex AC-234	Naphthol Red Light	7 months	Es	13.7	α	21	50	0.0028		[#hagan_effects_2004]	1
	Rhoplex AC-234	Naphthol Red Light	7 months	σT	1.8	α	21	60	0.0028		[#hagan_effects_2004]	0
	Rhoplex AC-234	Naphthol Red Light	7 months	Es	7	α	21	60	0.0028		[#hagan_effects_2004]	1
	Rhoplex AC-234	Naphthol Red Light	7 months	σT	1	α	21	80	0.0028		[#hagan_effects_2004]	0
	Rhoplex AC-234	Naphthol Red Light	7 months	Es	5.7	α	21	80	0.0028		[#hagan_effects_2004]	1
	Rhoplex AC-234	Naphthol Red Light	7 months	σT	5.7	α	21	20	0.0028	Immersed in water 24 hours, dried 72 hours	[#hagan_effects_2004]	0
	Rhoplex AC-234	Naphthol Red Light	7 months	Es	50.7	α	21	20	0.0028	Immersed in water 24 hours, dried 72 hours	[#hagan_effects_2004]	1
	Rhoplex AC-234	Naphthol Red Light	7 months	σT	4.2	α	21	40	0.0028	Immersed in water 24 hours, dried 72 hours	[#hagan_effects_2004]	0
	Rhoplex AC-234	Naphthol Red Light	7 months	Es	35.2	α	21	40	0.0028	Immersed in water 24 hours, dried 72 hours	[#hagan_effects_2004]	1
	Rhoplex AC-234	Naphthol Red Light	7 months	σT	3.3	α	21	50	0.0028	Immersed in water 24 hours, dried 72 hours	[#hagan_effects_2004]	0
	Rhoplex AC-234	Naphthol Red Light	7 months	Es	27	α	21	50	0.0028	Immersed in water 24 hours, dried 72 hours	[#hagan_effects_2004]	1
	Rhoplex AC-234	Naphthol Red Light	7 months	σT	2.9	α	21	60	0.0028	Immersed in water 24 hours, dried 72 hours	[#hagan_effects_2004]	0
	Rhoplex AC-234	Naphthol Red Light	7 months	Es	21.6	α	21	60	0.0028	Immersed in water 24 hours, dried 72 hours	[#hagan_effects_2004]	1
	Rhoplex AC-234	Naphthol Red Light	7 months	σT	1.9	α	21	80	0.0028	Immersed in water 24 hours, dried 72 hours	[#hagan_effects_2004]	0
	Rhoplex AC-234	Naphthol Red Light	7 months	Es	12.6	α	21	80	0.0028	Immersed in water 24 hours, dried 72 hours	[#hagan_effects_2004]	1
	Golden Acrylic (BA/MMA)	Titanium White	3 months	E	23	α	21	50	2e-05		[#hagan_factors_2007]	0
	Golden Acrylic (BA/MMA)	Titanium White	3 months	E	41	α	21	50	0.0002		[#hagan_factors_2007]	1
	Golden Acrylic (BA/MMA)	Titanium White	3 months	E	204	α	21	15	0.002		[#hagan_factors_2007]	0
	Golden Acrylic (BA/MMA)	Titanium White	3 months	E	89	α	21	35	0.002		[#hagan_factors_2007]	1
	Golden Acrylic (BA/MMA)	Titanium White	3 months	σT	11.5	α	21	50	0.002		[#hagan_factors_2007]	0
	Golden Acrylic (BA/MMA)	Titanium White	3 months	E	90	α	21	50	0.002		[#hagan_factors_2007]	1
	Golden Acrylic (BA/MMA)	Titanium White	3 months	E	13	α	21	65	0.002		[#hagan_factors_2007]	0
	Golden Acrylic (BA/MMA)	Titanium White	3 months	E	3.2	α	21	85	0.002		[#hagan_factors_2007]	1
	Golden Acrylic (BA/MMA)	Titanium White	3 months	E	227	α	21	50	0.02		[#hagan_factors_2007]	0
	Golden Acrylic (BA/MMA)	Titanium White	3 months	E	444	α	21	50	0.2		[#hagan_factors_2007]	1
	Dulux Trade: Eggshell	Pure Brilliant White	3 months	σT	5.6	α	21	50	0.002		[#hagan_factors_2007]	0
	Dulux Trade: Vinyl Silk	Pure Brilliant White	3 months	σT	3.6	α	21	50	0.002		[#hagan_factors_2007]	1
	Dulux Trade: Matte	Pure Brilliant White	3 months	σT	4.4	α	21	50	0.002		[#hagan_factors_2007]	0
	Crown: Matte	Pure Brilliant White	3 months	E	1110	α	21	50	2e-06		[#hagan_factors_2007]	1
	Crown: Matte	Pure Brilliant White	3 months	E	1250	α	21	50	2e-05		[#hagan_factors_2007]	0
	Crown: Matte	Pure Brilliant White	3 months	E	1570	α	21	50	0.0002		[#hagan_factors_2007]	1
	Crown: Matte	Pure Brilliant White	3 months	σT	4.3	α	21	50	0.002		[#hagan_factors_2007]	0
	Crown: Matte	Pure Brilliant White	3 months	E	2080	α	21	50	0.002		[#hagan_factors_2007]	1
	Crown: Matte	Pure Brilliant White	3 months	E	2430	α	21	50	0.02		[#hagan_factors_2007]	0
Golden Acrylic Gesso Primer	Liquitex	Cadmium Selenosulfide	6 days ambient, 112 days thermal aging	Es	0.11		20	55	0.001	2-layer system; Thermal aging: 60°C/55% RH, Es at 0.5% strain	[#young_interfacial_2007]	1
Golden Acrylic Gesso Primer	Liquitex	Cadmium Selenosulfide	6 days ambient, 112 days thermal aging	Es	0.04		20	55	0.001	2-layer system; Thermal aging: 60°C/55% RH, Es at 5.0% strain	[#young_interfacial_2007]	0
Golden Acrylic Gesso Primer	Liquitex	Cadmium Selenosulfide	6 days ambient, 0 days thermal aging	Es	0.06		20	55	0.001	2-layer system; Thermal aging: 60°C/55% RH, Es at 0.5% strain	[#young_interfacial_2007]	1
Golden Acrylic Gesso Primer	Liquitex	Cadmium Selenosulfide	6 days ambient, 0 days thermal aging	Es	0.03		20	55	0.001	2-layer system; Thermal aging: 60°C/55% RH, Es at 5.0% strain	[#young_interfacial_2007]	0
Roberson Acrylic Primer	Liquitex	Cadmium Selenosulfide	6 days ambient, 112 days thermal aging	Es	0.04		20	55	0.001	2-layer system; Thermal aging: 60°C/55% RH, Es at 5.0% strain	[#young_interfacial_2007]	1
Roberson Acrylic Primer	Liquitex	Cadmium Selenosulfide	6 days ambient, 0 days thermal aging	Es	0.02		20	55	0.001	2-layer system; Thermal aging: 60°C/55% RH, Es at 5.0% strain	[#young_interfacial_2007]	0
Winsor & Newton Alkyd Primer	Liquitex	Cadmium Selenosulfide	6 days ambient, 112 days thermal aging	Es	0.14		20	55	0.001	2-layer system; Thermal aging: 60°C/55% RH, Es at 5.0% strain	[#young_interfacial_2007]	1
Winsor & Newton Alkyd Primer	Liquitex	Cadmium Selenosulfide	6 days ambient, 0 days thermal aging	Es	0.05		20	55	0.001	2-layer system; Thermal aging: 60°C/55% RH, Es at 5.0% strain	[#young_interfacial_2007]	0
Spectrum Alkyd Primer	Liquitex	Cadmium Selenosulfide	6 days ambient, 112 days thermal aging	Es	0.17		20	55	0.001	2-layer system; Thermal aging: 60°C/55% RH, Es at 0.5% strain	[#young_interfacial_2007]	1
Spectrum Alkyd Primer	Liquitex	Cadmium Selenosulfide	6 days ambient, 112 days thermal aging	Es	0.08		20	55	0.001	2-layer system; Thermal aging: 60°C/55% RH, Es at 5.0% strain	[#young_interfacial_2007]	0
Spectrum Alkyd Primer	Liquitex	Cadmium Selenosulfide	6 days ambient, 0 days thermal aging	Es	0.05		20	55	0.001	2-layer system; Thermal aging: 60°C/55% RH, Es at 0.5% strain	[#young_interfacial_2007]	1
Spectrum Alkyd Primer	Liquitex	Cadmium Selenosulfide	6 days ambient, 0 days thermal aging	Es	0.05		20	55	0.001	2-layer system; Thermal aging: 60°C/55% RH, Es at 5.0% strain	[#young_interfacial_2007]	0
	Liquitex Ground		4-42 months	E	1370	α	21	55	0.002		[#ormsby_comparing_2008]	1
	Liquitex Ground		4-42 months	E	3300	α	21	20	0.002		[#ormsby_comparing_2008]	0
	Liquitex Ground		4-42 months	E	3600	α	10	55	0.002		[#ormsby_comparing_2008]	1
	Golden Ground		4-42 months	E	750	α	21	55	0.002		[#ormsby_comparing_2008]	0
	Golden Ground		4-42 months	E	1180	α	21	20	0.002		[#ormsby_comparing_2008]	1
	Golden Ground		4-42 months	E	2540	α	10	55	0.002		[#ormsby_comparing_2008]	0
	Winsor & Newton Ground		4-42 months	E	510	α	21	55	0.002		[#ormsby_comparing_2008]	1
	Winsor & Newton Ground		4-42 months	E	880	α	21	20	0.002		[#ormsby_comparing_2008]	0
	Winsor & Newton Ground		4-42 months	E	2040	α	10	55	0.002		[#ormsby_comparing_2008]	1
	Talens Ground		4-42 months	E	600	α	21	55	0.002		[#ormsby_comparing_2008]	0
	Talens Ground		4-42 months	E	1140	α	21	20	0.002		[#ormsby_comparing_2008]	1
	Talens Ground		4-42 months	E	2120	α	10	55	0.002		[#ormsby_comparing_2008]	0
	Liquitex	Titanium White	4-42 months	E	860	α	21	55	0.002		[#ormsby_comparing_2008]	1
	Liquitex	Titanium White	4-42 months	E	1850	α	21	20	0.002		[#ormsby_comparing_2008]	0
	Liquitex	Titanium White	4-42 months	E	2540	α	10	55	0.002		[#ormsby_comparing_2008]	1
	Golden	Titanium White	4-42 months	E	380	α	21	55	0.002		[#ormsby_comparing_2008]	0
	Golden	Titanium White	4-42 months	E	740	α	21	20	0.002		[#ormsby_comparing_2008]	1
	Golden	Titanium White	4-42 months	E	1570	α	10	55	0.002		[#ormsby_comparing_2008]	0
	Winsor & Newton	Titanium White	4-42 months	E	350	α	21	55	0.002		[#ormsby_comparing_2008]	1
	Winsor & Newton	Titanium White	4-42 months	E	630	α	21	20	0.002		[#ormsby_comparing_2008]	0
	Winsor & Newton	Titanium White	4-42 months	E	1680	α	10	55	0.002		[#ormsby_comparing_2008]	1
	Talens	Titanium White	4-42 months	E	560	α	21	55	0.002		[#ormsby_comparing_2008]	0
	Talens	Titanium White	4-42 months	E	1180	α	21	20	0.002		[#ormsby_comparing_2008]	1
	Talens	Titanium White	4-42 months	E	1580	α	10	55	0.002		[#ormsby_comparing_2008]	0
	Golden Gesso		7 months	E	4590		-10	55	0.002		[#young_cold_2008]	1
	Golden Gesso		7 months	E	2980		0	60	0.002		[#young_cold_2008]	0
	Golden Gesso		7 months	E	2085		10	57	0.002		[#young_cold_2008]	1
	Golden Gesso		7 months	E	390		20	54	0.002		[#young_cold_2008]	0
	Liquitex Gesso		7 months	E	7430		-10	55	0.002		[#young_cold_2008]	1
	Liquitex Gesso		7 months	E	3400		0	60	0.002		[#young_cold_2008]	0
	Liquitex Gesso		7 months	E	2810		10	57	0.002		[#young_cold_2008]	1
	Liquitex Gesso		7 months	E	350		20	54	0.002		[#young_cold_2008]	0
	Winsor & Newton Gesso		7 months	E	6570		-10	55	0.002		[#young_cold_2008]	1
	Winsor & Newton Gesso		7 months	E	3890		0	60	0.002		[#young_cold_2008]	0
	Winsor & Newton Gesso		7 months	E	3240		10	57	0.002		[#young_cold_2008]	1
	Winsor & Newton Gesso		7 months	E	451		20	54	0.002		[#young_cold_2008]	0
	Winsor & Newton Galeria		7 months	E	5710		-10	55	0.002		[#young_cold_2008]	1
	Winsor & Newton Galeria		7 months	E	4180		0	60	0.002		[#young_cold_2008]	0
	Winsor & Newton Galeria		7 months	E	1930		10	57	0.002		[#young_cold_2008]	1
	Winsor & Newton Galeria		7 months	E	366		20	54	0.002		[#young_cold_2008]	0
	Roberson Primer		7 months	E	3320		-10	55	0.002		[#young_cold_2008]	1
	Roberson Primer		7 months	E	1760		0	60	0.002		[#young_cold_2008]	0
	Roberson Primer		7 months	E	710		10	57	0.002		[#young_cold_2008]	1
	Roberson Primer		7 months	E	120		20	54	0.002		[#young_cold_2008]	0
	Golden Artist Colors PBA-MMA		1 year	Es	1850	α	-10	50	0.02	Es at 0.5% strain	[#hagan_tensile_2009]	1
	Golden Artist Colors PBA-MMA		1 year	Es	1430	α	0	50	0.02	Es at 0.5% strain	[#hagan_tensile_2009]	0
	Golden Artist Colors PBA-MMA		1 year	Es	760	α	10	50	0.02	Es at 0.5% strain	[#hagan_tensile_2009]	1
	Golden Artist Colors PBA-MMA		1 year	Es	160	α	20	50	0.02	Es at 0.5% strain	[#hagan_tensile_2009]	0
	Golden Artist Colors PBA-MMA		1 year	Es	18	α	30	50	0.02	Es at 0.5% strain	[#hagan_tensile_2009]	1
	Golden Artist Colors PBA-MMA		1 year	Es	1600	α	-10	50	0.002	Es at 0.5% strain	[#hagan_tensile_2009]	0
	Golden Artist Colors PBA-MMA		1 year	Es	1275	α	0	50	0.002	Es at 0.5% strain	[#hagan_tensile_2009]	1
	Golden Artist Colors PBA-MMA		1 year	Es	415	α	10	50	0.002	Es at 0.5% strain	[#hagan_tensile_2009]	0
	Golden Artist Colors PBA-MMA		1 year	Es	50	α	20	50	0.002	Es at 0.5% strain	[#hagan_tensile_2009]	1
	Golden Artist Colors PBA-MMA		1 year	Es	5	α	30	50	0.002	Es at 0.5% strain	[#hagan_tensile_2009]	0
	Golden Artist Colors PBA-MMA		1 year	Es	1320	α	-10	50	0.0002	Es at 0.5% strain	[#hagan_tensile_2009]	1
	Golden Artist Colors PBA-MMA		1 year	Es	725	α	0	50	0.0002	Es at 0.5% strain	[#hagan_tensile_2009]	0
	Golden Artist Colors PBA-MMA		1 year	Es	200	α	10	50	0.0002s-1	Es at 0.5% strain	[#hagan_tensile_2009]	1
	Golden Artist Colors PBA-MMA		1 year	Es	14	α	20	50	0.0002	Es at 0.5% strain	[#hagan_tensile_2009]	0
	Golden Artist Colors PBA-MMA		1 year	Es	3	α	30	50	0.0002	Es at 0.5% strain	[#hagan_tensile_2009]	1
	Golden Artist Colors PBA-MMA		1 year	Es	950	α	-10	50	2e-05	Es at 0.5% strain	[#hagan_tensile_2009]	0
	Golden Artist Colors PBA-MMA		1 year	Es	370	α	0	50	2e-05	Es at 0.5% strain	[#hagan_tensile_2009]	1
	Golden Artist Colors PBA-MMA		1 year	Es	60	α	10	50	2e-05	Es at 0.5% strain	[#hagan_tensile_2009]	0
	Golden Artist Colors PBA-MMA		1 year	Es	4	α	20	50	2e-05	Es at 0.5% strain	[#hagan_tensile_2009]	1
	Golden Artist Colors PBA-MMA		1 year	Es	2	α	30	50	2e-05	Es at 0.5% strain	[#hagan_tensile_2009]	0
	Golden Artist Colors PBA-MMA	Titanium white (0.13 v/v)	1 year	Es	2530	α	-10	50	0.02	Es at 0.5% strain	[#hagan_tensile_2009]	1
	Golden Artist Colors PBA-MMA	Titanium white (0.13 v/v)	1 year	Es	2090	α	-10	50	0.002	Es at 0.5% strain	[#hagan_tensile_2009]	0
	Golden Artist Colors PBA-MMA	Titanium white (0.13 v/v)	1 year	Es	1860	α	0	50	0.02s-1	Es at 0.5% strain	[#hagan_tensile_2009]	1
	Golden Artist Colors PBA-MMA	Titanium white (0.13 v/v)	1 year	Es	1700	α	-10	50	0.0002	Es at 0.5% strain	[#hagan_tensile_2009]	0
	Golden Artist Colors PBA-MMA	Titanium white (0.13 v/v)	1 year	Es	1440	α	0	50	0.002	Es at 0.5% strain	[#hagan_tensile_2009]	1
	Golden Artist Colors PBA-MMA	Titanium white (0.13 v/v)	1 year	Es	1275	α	-10	50	2e-05	Es at 0.5% strain	[#hagan_tensile_2009]	0
	Golden Artist Colors PBA-MMA	Titanium white (0.13 v/v)	1 year	Es	1175	α	10	50	0.02	Es at 0.5% strain	[#hagan_tensile_2009]	1
	Golden Artist Colors PBA-MMA	Titanium white (0.13 v/v)	1 year	Es	965	α	0	50	0.0002	Es at 0.5% strain	[#hagan_tensile_2009]	0
	Golden Artist Colors PBA-MMA	Titanium white (0.13 v/v)	1 year	Es	720	α	10	50	0.002	Es at 0.5% strain	[#hagan_tensile_2009]	1
	Golden Artist Colors PBA-MMA	Titanium white (0.13 v/v)	1 year	Es	595	α	0	50	2e-05	Es at 0.5% strain	[#hagan_tensile_2009]	0
	Golden Artist Colors PBA-MMA	Titanium white (0.13 v/v)	1 year	Es	340	α	10	50	0.0002	Es at 0.5% strain	[#hagan_tensile_2009]	1
	Golden Artist Colors PBA-MMA	Titanium white (0.13 v/v)	1 year	Es	115	α	10	50	2e-05	Es at 0.5% strain	[#hagan_tensile_2009]	0
	Golden Artist Colors PBA-MMA	Titanium white (0.13 v/v)	1 year	Es	47	α	30	50	0.02	Es at 0.5% strain	[#hagan_tensile_2009]	1
	Golden Artist Colors PBA-MMA	Titanium white (0.13 v/v)	1 year	Es	34	α	20	50	0.0002	Es at 0.5% strain	[#hagan_tensile_2009]	0
	Golden Artist Colors PBA-MMA	Titanium white (0.13 v/v)	1 year	Es	15	α	30	50	0.002	Es at 0.5% strain	[#hagan_tensile_2009]	1
	Golden Artist Colors PBA-MMA	Titanium white (0.13 v/v)	1 year	Es	11	α	20	50	2e-05	Es at 0.5% strain	[#hagan_tensile_2009]	0
	Golden Artist Colors PBA-MMA	Titanium white (0.13 v/v)	1 year	Es	7	α	30	50	0.0002	Es at 0.5% strain	[#hagan_tensile_2009]	1
	Golden Artist Colors PBA-MMA	Titanium white (0.13 v/v)	1 year	Es	4	α	30	50	2e-05	Es at 0.5% strain	[#hagan_tensile_2009]	0
	Golden Artist Colors PBA-MMA	Titanium white (0.25 v/v)	1 year	Es	3590	α	-10	50	0.02	Es at 0.5% strain	[#hagan_tensile_2009]	1
	Golden Artist Colors PBA-MMA	Titanium white (0.25 v/v)	1 year	Es	2980	α	-10	50	0.002	Es at 0.5% strain	[#hagan_tensile_2009]	0
	Golden Artist Colors PBA-MMA	Titanium white (0.25 v/v)	1 year	Es	2590	α	0	50	0.02	Es at 0.5% strain	[#hagan_tensile_2009]	1
	Golden Artist Colors PBA-MMA	Titanium white (0.25 v/v)	1 year	Es	2410	α	-10	50	0.0002	Es at 0.5% strain	[#hagan_tensile_2009]	0
	Golden Artist Colors PBA-MMA	Titanium white (0.25 v/v)	1 year	Es	1865	α	0	50	0.002	Es at 0.5% strain	[#hagan_tensile_2009]	1
	Golden Artist Colors PBA-MMA	Titanium white (0.25 v/v)	1 year	Es	1850	α	-10	50	2e-05	Es at 0.5% strain	[#hagan_tensile_2009]	0
	Golden Artist Colors PBA-MMA	Titanium white (0.25 v/v)	1 year	Es	1710	α	10	50	0.02	Es at 0.5% strain	[#hagan_tensile_2009]	1
	Golden Artist Colors PBA-MMA	Titanium white (0.25 v/v)	1 year	Es	1240	α	0	50	0.0002	Es at 0.5% strain	[#hagan_tensile_2009]	0
	Golden Artist Colors PBA-MMA	Titanium white (0.25 v/v)	1 year	Es	950	α	10	50	0.002	Es at 0.5% strain	[#hagan_tensile_2009]	1
	Golden Artist Colors PBA-MMA	Titanium white (0.25 v/v)	1 year	Es	720	α	0	50	2e-05	Es at 0.5% strain	[#hagan_tensile_2009]	0
	Golden Artist Colors PBA-MMA	Titanium white (0.25 v/v)	1 year	Es	520	α	20	50	0.02	Es at 0.5% strain	[#hagan_tensile_2009]	1
	Golden Artist Colors PBA-MMA	Titanium white (0.25 v/v)	1 year	Es	440	α	10	50	0.0002	Es at 0.5% strain	[#hagan_tensile_2009]	0
	Golden Artist Colors PBA-MMA	Titanium white (0.25 v/v)	1 year	Es	210	α	20	50	0.002	Es at 0.5% strain	[#hagan_tensile_2009]	1
	Golden Artist Colors PBA-MMA	Titanium white (0.25 v/v)	1 year	Es	150	α	10	50	2e-05	Es at 0.5% strain	[#hagan_tensile_2009]	0
	Golden Artist Colors PBA-MMA	Titanium white (0.25 v/v)	1 year	Es	115	α	30	50	0.02	Es at 0.5% strain	[#hagan_tensile_2009]	1
	Golden Artist Colors PBA-MMA	Titanium white (0.25 v/v)	1 year	Es	77	α	20	50	0.0002	Es at 0.5% strain	[#hagan_tensile_2009]	0
	Golden Artist Colors PBA-MMA	Titanium white (0.25 v/v)	1 year	Es	48	α	30	50	0.002	Es at 0.5% strain	[#hagan_tensile_2009]	1
	Golden Artist Colors PBA-MMA	Titanium white (0.25 v/v)	1 year	Es	32	α	20	50	2e-05	Es at 0.5% strain	[#hagan_tensile_2009]	0
	Golden Artist Colors PBA-MMA	Titanium white (0.25 v/v)	1 year	Es	23	α	30	50	0.0002	Es at 0.5% strain	[#hagan_tensile_2009]	1
	Golden Artist Colors PBA-MMA	Titanium white (0.25 v/v)	1 year	Es	15	α	30	50	2e-05	Es at 0.5% strain	[#hagan_tensile_2009]	0
	Golden Artist Colors PBA-MMA	Titanium white (0.38 v/v)	1 year	Es	4770	α	-10	50	0.02	Es at 0.5% strain	[#hagan_tensile_2009]	1
	Golden Artist Colors PBA-MMA	Titanium white (0.38 v/v)	1 year	Es	3920	α	-10	50	0.002	Es at 0.5% strain	[#hagan_tensile_2009]	0
	Golden Artist Colors PBA-MMA	Titanium white (0.38 v/v)	1 year	Es	3430	α	0	50	0.02	Es at 0.5% strain	[#hagan_tensile_2009]	1
	Golden Artist Colors PBA-MMA	Titanium white (0.38 v/v)	1 year	Es	3380	α	-10	50	0.0002	Es at 0.5% strain	[#hagan_tensile_2009]	0
	Golden Artist Colors PBA-MMA	Titanium white (0.38 v/v)	1 year	Es	2830	α	0	50	0.002	Es at 0.5% strain	[#hagan_tensile_2009]	1
	Golden Artist Colors PBA-MMA	Titanium white (0.38 v/v)	1 year	Es	2670	α	-10	50	2e-05	Es at 0.5% strain	[#hagan_tensile_2009]	0
	Golden Artist Colors PBA-MMA	Titanium white (0.38 v/v)	1 year	Es	2350	α	10	50	0.02	Es at 0.5% strain	[#hagan_tensile_2009]	1
	Golden Artist Colors PBA-MMA	Titanium white (0.38 v/v)	1 year	Es	1770	α	0	50	0.0002	Es at 0.5% strain	[#hagan_tensile_2009]	0
	Golden Artist Colors PBA-MMA	Titanium white (0.38 v/v)	1 year	Es	1460	α	10	50	0.002	Es at 0.5% strain	[#hagan_tensile_2009]	1
	Golden Artist Colors PBA-MMA	Titanium white (0.38 v/v)	1 year	Es	1010	α	0	50	2e-05	Es at 0.5% strain	[#hagan_tensile_2009]	0
	Golden Artist Colors PBA-MMA	Titanium white (0.38 v/v)	1 year	Es	830	α	20	50	0.02	Es at 0.5% strain	[#hagan_tensile_2009]	1
	Golden Artist Colors PBA-MMA	Titanium white (0.38 v/v)	1 year	Es	790	α	10	50	0.0002	Es at 0.5% strain	[#hagan_tensile_2009]	0
	Golden Artist Colors PBA-MMA	Titanium white (0.38 v/v)	1 year	Es	380	α	20	50	0.002	Es at 0.5% strain	[#hagan_tensile_2009]	1
	Golden Artist Colors PBA-MMA	Titanium white (0.38 v/v)	1 year	Es	320	α	30	50	0.02	Es at 0.5% strain	[#hagan_tensile_2009]	0
	Golden Artist Colors PBA-MMA	Titanium white (0.38 v/v)	1 year	Es	220	α	20	50	0.0002	Es at 0.5% strain	[#hagan_tensile_2009]	1
	Golden Artist Colors PBA-MMA	Titanium white (0.38 v/v)	1 year	Es	180	α	30	50	0.002	Es at 0.5% strain	[#hagan_tensile_2009]	0
	Golden Artist Colors PBA-MMA	Titanium white (0.38 v/v)	1 year	Es	140	α	20	50	2e-05	Es at 0.5% strain	[#hagan_tensile_2009]	1
	Golden Artist Colors PBA-MMA	Titanium white (0.38 v/v)	1 year	Es	115	α	30	50	0.0002	Es at 0.5% strain	[#hagan_tensile_2009]	0
	Golden Artist Colors PBA-MMA	Titanium white (0.38 v/v)	1 year	Es	90	α	30	50	2e-05	Es at 0.5% strain	[#hagan_tensile_2009]	1
	Golden Artist Colors PBA-MMA		1 year	Es	460	α	20	5	0.02	Es at 0.5% strain	[#hagan_tensile_2009]	0
	Golden Artist Colors PBA-MMA		1 year	Es	210	α	20	5	0.002	Es at 0.5% strain	[#hagan_tensile_2009]	1
	Golden Artist Colors PBA-MMA		1 year	Es	74	α	30	5	0.02	Es at 0.5% strain	[#hagan_tensile_2009]	0
	Golden Artist Colors PBA-MMA		1 year	Es	23	α	30	5	0.002	Es at 0.5% strain	[#hagan_tensile_2009]	1
	Golden Artist Colors PBA-MMA		1 year	Es	19	α	20	5	2e-05	Es at 0.5% strain	[#hagan_tensile_2009]	0
	Golden Artist Colors PBA-MMA		1 year	Es	5	α	30	5	2e-05	Es at 0.5% strain	[#hagan_tensile_2009]	1
	Golden Artist Colors PBA-MMA	Titanium white (0.38 v/v)	1 year	Es	2390	α	20	5	0.02	Es at 0.5% strain	[#hagan_tensile_2009]	0
	Golden Artist Colors PBA-MMA	Titanium white (0.38 v/v)	1 year	Es	1240	α	20	5	0.002	Es at 0.5% strain	[#hagan_tensile_2009]	1
	Golden Artist Colors PBA-MMA	Titanium white (0.38 v/v)	1 year	Es	840	α	20	5	0.0002	Es at 0.5% strain	[#hagan_tensile_2009]	0
	Golden Artist Colors PBA-MMA	Titanium white (0.38 v/v)	1 year	Es	730	α	20	5	2e-05	Es at 0.5% strain	[#hagan_tensile_2009]	1
	Golden Artist Colors PBA-MMA	Titanium white (0.38 v/v)	1 year	Es	460	α	30	5	0.0002	Es at 0.5% strain	[#hagan_tensile_2009]	0
	Golden Artist Colors PBA-MMA	Titanium white (0.38 v/v)	1 year	Es	410	α	30	5	2e-05	Es at 0.5% strain	[#hagan_tensile_2009]	1
	Golden Artist Colors PBA-MMA	kaolin (0.28 v/v)	1 year	Es	4780	α	-10	50	0.02	Es at 0.5% strain	[#hagan_viscoelastic_2010]	0
	Golden Artist Colors PBA-MMA	kaolin (0.28 v/v)	1 year	Es	3930	α	-10	50	0.002	Es at 0.5% strain	[#hagan_viscoelastic_2010]	1
	Golden Artist Colors PBA-MMA	kaolin (0.28 v/v)	1 year	Es	3410	α	-10	50	0.0002	Es at 0.5% strain	[#hagan_viscoelastic_2010]	0
	Golden Artist Colors PBA-MMA	kaolin (0.28 v/v)	1 year	Es	2690	α	-10	50	2e-05	Es at 0.5% strain	[#hagan_viscoelastic_2010]	1
	Golden Artist Colors PBA-MMA	kaolin (0.28 v/v)	1 year	Es	3460	α	0	50	0.02	Es at 0.5% strain	[#hagan_viscoelastic_2010]	0
	Golden Artist Colors PBA-MMA	kaolin (0.28 v/v)	1 year	Es	2830	α	0	50	0.002	Es at 0.5% strain	[#hagan_viscoelastic_2010]	1
	Golden Artist Colors PBA-MMA	kaolin (0.28 v/v)	1 year	Es	1780	α	0	50	0.0002	Es at 0.5% strain	[#hagan_viscoelastic_2010]	0
	Golden Artist Colors PBA-MMA	kaolin (0.28 v/v)	1 year	Es	1020	α	0	50	2e-05	Es at 0.5% strain	[#hagan_viscoelastic_2010]	1
	Golden Artist Colors PBA-MMA	kaolin (0.28 v/v)	1 year	Es	2350	α	10	50	0.02	Es at 0.5% strain	[#hagan_viscoelastic_2010]	0
	Golden Artist Colors PBA-MMA	kaolin (0.28 v/v)	1 year	Es	1460	α	10	50	0.002	Es at 0.5% strain	[#hagan_viscoelastic_2010]	1
	Golden Artist Colors PBA-MMA	kaolin (0.28 v/v)	1 year	Es	790	α	10	50	0.0002	Es at 0.5% strain	[#hagan_viscoelastic_2010]	0
	Golden Artist Colors PBA-MMA	kaolin (0.28 v/v)	1 year	Es	810	α	20	50	0.02	Es at 0.5% strain	[#hagan_viscoelastic_2010]	1
	Golden Artist Colors PBA-MMA	kaolin (0.28 v/v)	1 year	Es	370	α	20	50	0.002	Es at 0.5% strain	[#hagan_viscoelastic_2010]	0
	Golden Artist Colors PBA-MMA	kaolin (0.28 v/v)	1 year	Es	210	α	20	50	0.0002	Es at 0.5% strain	[#hagan_viscoelastic_2010]	1
	Golden Artist Colors PBA-MMA	kaolin (0.28 v/v)	1 year	Es	130	α	20	50	2e-05	Es at 0.5% strain	[#hagan_viscoelastic_2010]	0
	Golden Artist Colors PBA-MMA	kaolin (0.28 v/v)	1 year	Es	320	α	30	50	0.02	Es at 0.5% strain	[#hagan_viscoelastic_2010]	1
	Golden Artist Colors PBA-MMA	kaolin (0.28 v/v)	1 year	Es	170	α	30	50	0.002	Es at 0.5% strain	[#hagan_viscoelastic_2010]	0
	Golden Artist Colors PBA-MMA	kaolin (0.28 v/v)	1 year	Es	110	α	30	50	0.0002	Es at 0.5% strain	[#hagan_viscoelastic_2010]	1
	Golden Artist Colors PBA-MMA	kaolin (0.28 v/v)	1 year	Es	90	α	30	50	2e-05	Es at 0.5% strain	[#hagan_viscoelastic_2010]	0
	Golden Artist Colors PBA-MMA	kaolin (0.15 v/v)	1 year	Es	3410	α	-10	50	0.02	Es at 0.5% strain	[#hagan_viscoelastic_2010]	1
	Golden Artist Colors PBA-MMA	kaolin (0.15 v/v)	1 year	Es	2880	α	-10	50	0.002	Es at 0.5% strain	[#hagan_viscoelastic_2010]	0
	Golden Artist Colors PBA-MMA	kaolin (0.15 v/v)	1 year	Es	2580	α	0	50	0.02	Es at 0.5% strain	[#hagan_viscoelastic_2010]	1
	Golden Artist Colors PBA-MMA	kaolin (0.15 v/v)	1 year	Es	2280	α	-10	50	0.0002	Es at 0.5% strain	[#hagan_viscoelastic_2010]	0
	Golden Artist Colors PBA-MMA	kaolin (0.15 v/v)	1 year	Es	1960	α	0	50	0.002	Es at 0.5% strain	[#hagan_viscoelastic_2010]	1
	Golden Artist Colors PBA-MMA	kaolin (0.15 v/v)	1 year	Es	1860	α	-10	50	2e-05	Es at 0.5% strain	[#hagan_viscoelastic_2010]	0
	Golden Artist Colors PBA-MMA	kaolin (0.15 v/v)	1 year	Es	1510	α	10	50	0.02	Es at 0.5% strain	[#hagan_viscoelastic_2010]	1
	Golden Artist Colors PBA-MMA	kaolin (0.15 v/v)	1 year	Es	1270	α	0	50	0.0002	Es at 0.5% strain	[#hagan_viscoelastic_2010]	0
	Golden Artist Colors PBA-MMA	kaolin (0.15 v/v)	1 year	Es	820	α	10	50	0.002	Es at 0.5% strain	[#hagan_viscoelastic_2010]	1
	Golden Artist Colors PBA-MMA	kaolin (0.15 v/v)	1 year	Es	790	α	0	50	2e-05	Es at 0.5% strain	[#hagan_viscoelastic_2010]	0
	Golden Artist Colors PBA-MMA	kaolin (0.15 v/v)	1 year	Es	440	α	10	50	0.0002	Es at 0.5% strain	[#hagan_viscoelastic_2010]	1
	Golden Artist Colors PBA-MMA	kaolin (0.15 v/v)	1 year	Es	450	α	20	50	0.02	Es at 0.5% strain	[#hagan_viscoelastic_2010]	0
	Golden Artist Colors PBA-MMA	kaolin (0.15 v/v)	1 year	Es	160	α	20	50	0.002	Es at 0.5% strain	[#hagan_viscoelastic_2010]	1
	Golden Artist Colors PBA-MMA	kaolin (0.15 v/v)	1 year	Es	150	α	10	50	2e-05	Es at 0.5% strain	[#hagan_viscoelastic_2010]	0
	Golden Artist Colors PBA-MMA	kaolin (0.15 v/v)	1 year	Es	76	α	30	50	0.02	Es at 0.5% strain	[#hagan_viscoelastic_2010]	1
	Golden Artist Colors PBA-MMA	kaolin (0.15 v/v)	1 year	Es	49	α	20	50	0.0002	Es at 0.5% strain	[#hagan_viscoelastic_2010]	0
	Golden Artist Colors PBA-MMA	kaolin (0.15 v/v)	1 year	Es	28	α	30	50	0.002	Es at 0.5% strain	[#hagan_viscoelastic_2010]	1
	Golden Artist Colors PBA-MMA	kaolin (0.15 v/v)	1 year	Es	20	α	20	50	2e-05	Es at 0.5% strain	[#hagan_viscoelastic_2010]	0
	Golden Artist Colors PBA-MMA	kaolin (0.15 v/v)	1 year	Es	13	α	30	50	0.0002	Es at 0.5% strain	[#hagan_viscoelastic_2010]	1
	Golden Artist Colors PBA-MMA	kaolin (0.15 v/v)	1 year	Es	9	α	30	50	2e-05	Es at 0.5% strain	[#hagan_viscoelastic_2010]	0
	Golden Artist Colors PBA-MMA		1 year	Es	1470	α	-10	50	0.02	immersed in water 24 hours, Es at 0.5% strain	[#hagan_viscoelastic_2010]	1
	Golden Artist Colors PBA-MMA		1 year	Es	1270	α	0	50	0.02	immersed in water 24 hours, Es at 0.5% strain	[#hagan_viscoelastic_2010]	0
	Golden Artist Colors PBA-MMA		1 year	Es	950	α	0	50	0.002	immersed in water 24 hours, Es at 0.5% strain	[#hagan_viscoelastic_2010]	1
	Golden Artist Colors PBA-MMA		1 year	Es	680	α	-10	50	2e-05	immersed in water 24 hours, Es at 0.5% strain	[#hagan_viscoelastic_2010]	0
	Golden Artist Colors PBA-MMA		1 year	Es	660	α	0	50	0.0002	immersed in water 24 hours, Es at 0.5% strain	[#hagan_viscoelastic_2010]	1
	Golden Artist Colors PBA-MMA		1 year	Es	350	α	10	50	0.002	immersed in water 24 hours, Es at 0.5% strain	[#hagan_viscoelastic_2010]	0
	Golden Artist Colors PBA-MMA		1 year	Es	130	α	20	50	0.02	immersed in water 24 hours, Es at 0.5% strain	[#hagan_viscoelastic_2010]	1
	Golden Artist Colors PBA-MMA		1 year	Es	32	α	20	50	0.002	immersed in water 24 hours, Es at 0.5% strain	[#hagan_viscoelastic_2010]	0
	Golden Artist Colors PBA-MMA		1 year	Es	14	α	30	50	0.02	immersed in water 24 hours, Es at 0.5% strain	[#hagan_viscoelastic_2010]	1
	Golden Artist Colors PBA-MMA		1 year	Es	10	α	20	50	0.0002	immersed in water 24 hours, Es at 0.5% strain	[#hagan_viscoelastic_2010]	0
	Golden Artist Colors PBA-MMA		1 year	Es	4	α	30	50	0.002	immersed in water 24 hours, Es at 0.5% strain	[#hagan_viscoelastic_2010]	1
	Golden Artist Colors PBA-MMA		1 year	Es	3	α	20	50	2e-05	immersed in water 24 hours, Es at 0.5% strain	[#hagan_viscoelastic_2010]	0
	Golden Artist Colors PBA-MMA		1 year	Es	2	α	30	50	0.0002	immersed in water 24 hours, Es at 0.5% strain	[#hagan_viscoelastic_2010]	1
	Golden Artist Colors PBA-MMA	Titanium white (0.13 v/v)	1 year	Es	300	α	20	50	0.02	immersed in water 24 hours, Es at 0.5% strain	[#hagan_viscoelastic_2010]	0
	Golden Artist Colors PBA-MMA	Titanium white (0.13 v/v)	1 year	Es	110	α	20	50	0.002	immersed in water 24 hours, Es at 0.5% strain	[#hagan_viscoelastic_2010]	1
	Golden Artist Colors PBA-MMA	Titanium white (0.13 v/v)	1 year	Es	45	α	30	50	0.02	immersed in water 24 hours, Es at 0.5% strain	[#hagan_viscoelastic_2010]	0
	Golden Artist Colors PBA-MMA	Titanium white (0.13 v/v)	1 year	Es	31	α	20	50	0.0002	immersed in water 24 hours, Es at 0.5% strain	[#hagan_viscoelastic_2010]	1
	Golden Artist Colors PBA-MMA	Titanium white (0.13 v/v)	1 year	Es	14	α	30	50	0.002	immersed in water 24 hours, Es at 0.5% strain	[#hagan_viscoelastic_2010]	0
	Golden Artist Colors PBA-MMA	Titanium white (0.13 v/v)	1 year	Es	10	α	20	50	2e-05	immersed in water 24 hours, Es at 0.5% strain	[#hagan_viscoelastic_2010]	1
	Golden Artist Colors PBA-MMA	Titanium white (0.13 v/v)	1 year	Es	5	α	30	50	0.0002	immersed in water 24 hours, Es at 0.5% strain	[#hagan_viscoelastic_2010]	0
	Golden Artist Colors PBA-MMA	Titanium white (0.13 v/v)	1 year	Es	3	α	30	50	2e-05	immersed in water 24 hours, Es at 0.5% strain	[#hagan_viscoelastic_2010]	1
	Golden Artist Colors PBA-MMA	Titanium white (0.25 v/v)	1 year	Es	700	α	20	50	0.02	immersed in water 24 hours, Es at 0.5% strain	[#hagan_viscoelastic_2010]	0
	Golden Artist Colors PBA-MMA	Titanium white (0.25 v/v)	1 year	Es	310	α	20	50	0.002	immersed in water 24 hours, Es at 0.5% strain	[#hagan_viscoelastic_2010]	1
	Golden Artist Colors PBA-MMA	Titanium white (0.25 v/v)	1 year	Es	180	α	30	50	0.02	immersed in water 24 hours, Es at 0.5% strain	[#hagan_viscoelastic_2010]	0
	Golden Artist Colors PBA-MMA	Titanium white (0.25 v/v)	1 year	Es	120	α	20	50	0.0002	immersed in water 24 hours, Es at 0.5% strain	[#hagan_viscoelastic_2010]	1
	Golden Artist Colors PBA-MMA	Titanium white (0.25 v/v)	1 year	Es	76	α	30	50	0.002	immersed in water 24 hours, Es at 0.5% strain	[#hagan_viscoelastic_2010]	0
	Golden Artist Colors PBA-MMA	Titanium white (0.25 v/v)	1 year	Es	60	α	20	50	2e-05	immersed in water 24 hours, Es at 0.5% strain	[#hagan_viscoelastic_2010]	1
	Golden Artist Colors PBA-MMA	Titanium white (0.25 v/v)	1 year	Es	41	α	30	50	0.0002	immersed in water 24 hours, Es at 0.5% strain	[#hagan_viscoelastic_2010]	0
	Golden Artist Colors PBA-MMA	Titanium white (0.25 v/v)	1 year	Es	25	α	30	50	2e-05	immersed in water 24 hours, Es at 0.5% strain	[#hagan_viscoelastic_2010]	1
	Golden Artist Colors PBA-MMA	Titanium white (0.38 v/v)	1 year	Es	1410	α	20	50	0.02	immersed in water 24 hours, Es at 0.5% strain	[#hagan_viscoelastic_2010]	0
	Golden Artist Colors PBA-MMA	Titanium white (0.38 v/v)	1 year	Es	890	α	20	50	0.002	immersed in water 24 hours, Es at 0.5% strain	[#hagan_viscoelastic_2010]	1
	Golden Artist Colors PBA-MMA	Titanium white (0.38 v/v)	1 year	Es	620	α	30	50	0.02	immersed in water 24 hours, Es at 0.5% strain	[#hagan_viscoelastic_2010]	0
	Golden Artist Colors PBA-MMA	Titanium white (0.38 v/v)	1 year	Es	510	α	20	50	0.0002	immersed in water 24 hours, Es at 0.5% strain	[#hagan_viscoelastic_2010]	1
	Golden Artist Colors PBA-MMA	Titanium white (0.38 v/v)	1 year	Es	350	α	30	50	0.002	immersed in water 24 hours, Es at 0.5% strain	[#hagan_viscoelastic_2010]	0
	Golden Artist Colors PBA-MMA	Titanium white (0.38 v/v)	1 year	Es	320	α	20	50	2e-05	immersed in water 24 hours, Es at 0.5% strain	[#hagan_viscoelastic_2010]	1
	Golden Artist Colors PBA-MMA	Titanium white (0.38 v/v)	1 year	Es	250	α	30	50	0.0002	immersed in water 24 hours, Es at 0.5% strain	[#hagan_viscoelastic_2010]	0
	Golden Artist Colors PBA-MMA	Titanium white (0.38 v/v)	1 year	Es	190	α	30	50	2e-05	immersed in water 24 hours, Es at 0.5% strain	[#hagan_viscoelastic_2010]	1
	Golden Artist Colors PBA-MMA	Titanium white (0.06 v/v)	1 year	E*	1650	α	-10	50	2e-05	tested in casting direction	[#hagan_michromechanics_2011]	0
	Golden Artist Colors PBA-MMA	kaolin (0.07 v/v)	1 year	E*	1950	α	-10	50	2e-05	tested in casting direction	[#hagan_michromechanics_2011]	1
	Golden Artist Colors PBA-MMA	CaCO3 (0.08 v/v)	1 year	E*	1980	α	-10	50	2e-05	tested in casting direction	[#hagan_michromechanics_2011]	0
	Golden Artist Colors PBA-MMA	CaCO3 (0.08 v/v)	1 year	E*	1710	α	-10	50	2e-05	tested perpendicular to casting direction	[#hagan_michromechanics_2011]	1
	Golden Artist Colors PBA-MMA	Titanium white (0.13 v/v)	1 year	E*	1920	α	-10	50	2e-05	tested perpendicular to casting direction	[#hagan_michromechanics_2011]	0
	Golden Artist Colors PBA-MMA	Titanium white (0.13 v/v)	1 year	E*	1960	α	-10	50	2e-05	tested in casting direction	[#hagan_michromechanics_2011]	1
	Golden Artist Colors PBA-MMA	kaolin (0.14 v/v)	1 year	E*	2450	α	-10	50	2e-05	tested perpendicular to casting direction	[#hagan_michromechanics_2011]	0
	Golden Artist Colors PBA-MMA	kaolin (0.14 v/v)	1 year	E*	2660	α	-10	50	2e-05	tested in casting direction	[#hagan_michromechanics_2011]	1
	Golden Artist Colors PBA-MMA	CaCO3 (0.16 v/v)	1 year	E*	2080	α	-10	50	2e-05	tested perpendicular to casting direction	[#hagan_michromechanics_2011]	0
	Golden Artist Colors PBA-MMA	CaCO3 (0.16 v/v)	1 year	E*	2390	α	-10	50	2e-05	tested in casting direction	[#hagan_michromechanics_2011]	1
	Golden Artist Colors PBA-MMA	Titanium white (0.20 v/v)	1 year	E*	2220	α	-10	50	2e-05	tested perpendicular to casting direction	[#hagan_michromechanics_2011]	0
	Golden Artist Colors PBA-MMA	Titanium white (0.20 v/v)	1 year	E*	2300	α	-10	50	2e-05	tested in casting direction	[#hagan_michromechanics_2011]	1
	Golden Artist Colors PBA-MMA	kaolin (0.22 v/v)	1 year	E*	3100	α	-10	50	2e-05	tested perpendicular to casting direction	[#hagan_michromechanics_2011]	0
	Golden Artist Colors PBA-MMA	kaolin (0.22 v/v)	1 year	E*	3520	α	-10	50	2e-05	tested in casting direction	[#hagan_michromechanics_2011]	1
	Golden Artist Colors PBA-MMA	CaCO3 (0.24 v/v)	1 year	E*	2440	α	-10	50	2e-05	tested perpendicular to casting direction	[#hagan_michromechanics_2011]	0
	Golden Artist Colors PBA-MMA	CaCO3 (0.24 v/v)	1 year	E*	3030	α	-10	50	2e-05	tested in casting direction	[#hagan_michromechanics_2011]	1
	Golden Artist Colors PBA-MMA	Titanium white (0.25 v/v)	1 year	E*	2670	α	-10	50	2e-05	tested perpendicular to casting direction	[#hagan_michromechanics_2011]	0
	Golden Artist Colors PBA-MMA	Titanium white (0.25 v/v)	1 year	E*	2760	α	-10	50	2e-05	tested in casting direction	[#hagan_michromechanics_2011]	1
	Golden Artist Colors PBA-MMA	kaolin (0.28 v/v)	1 year	E*	4050	α	-10	50	2e-05	tested in casting direction	[#hagan_michromechanics_2011]	0
	Golden Artist Colors PBA-MMA	CaCO3 (0.30 v/v)	1 year	E*	2990	α	-10	50	2e-05	tested perpendicular to casting direction	[#hagan_michromechanics_2011]	1
	Golden Artist Colors PBA-MMA	CaCO3 (0.30 v/v)	1 year	E*	3850	α	-10	50	2e-05	tested in casting direction	[#hagan_michromechanics_2011]	0
	Golden Artist Colors PBA-MMA	Titanium white (0.32 v/v)	1 year	E*	3310	α	-10	50	2e-05	tested perpendicular to casting direction	[#hagan_michromechanics_2011]	1
	Golden Artist Colors PBA-MMA	Titanium white (0.32 v/v)	1 year	E*	3430	α	-10	50	2e-05	tested in casting direction	[#hagan_michromechanics_2011]	0
	Golden Artist Colors PBA-MMA	CaCO3 (0.38 v/v)	1 year	E*	3590	α	-10	50	2e-05	tested perpendicular to casting direction	[#hagan_michromechanics_2011]	1
	Golden Artist Colors PBA-MMA	CaCO3 (0.38 v/v)	1 year	E*	4500	α	-10	50	2e-05	tested in casting direction	[#hagan_michromechanics_2011]	0
	Golden Artist Colors PBA-MMA	Titanium white (0.38 v/v)	1 year	E*	3530	α	-10	50	2e-05	tested perpendicular to casting direction	[#hagan_michromechanics_2011]	1
	Golden Artist Colors PBA-MMA	Titanium white (0.38 v/v)	1 year	E*	3790	α	-10	50	2e-05	tested in casting direction	[#hagan_michromechanics_2011]	0
	Liquitex Heavy Body	Burnt Umber	1-2 years	Es	34	α	23	55		Es at 1% strain	[#domenech-carbo_multitechnique_2013]	1
	Liquitex Heavy Body	Burnt Umber	1-2 years	Es	250	α	23	55		Immersed in ethanol 20 min, Dried 1 month, Es at 1% strain	[#domenech-carbo_multitechnique_2013]	0
	Liquitex Heavy Body	Burnt Umber	1-2 years	Es	330	α	23	55		Immersed in acetone 12 hours, Dried 1 month, Es at 1% strain	[#domenech-carbo_multitechnique_2013]	1
	Liquitex Heavy Body	Burnt Umber	1-2 years	Es	110	α	23	55		Immersed in water 20 min, Dried 1 month, Es at 1% strain	[#domenech-carbo_multitechnique_2013]	0
	Liquitex Heavy Body	Burnt Umber	1-2 years	Es	250	α	23	55		Immersed in ethanol 12 hours, Dried 1 month, Es at 1% strain	[#domenech-carbo_multitechnique_2013]	1
	Liquitex Heavy Body	Burnt Umber	1-2 years	Es	250	α	23	55		Immersed in water 12 hours, Dried 1 month, Es at 1% strain	[#domenech-carbo_multitechnique_2013]	0
	Liquitex Heavy Body	Phthalocyanine Blue	1-2 years	Es	4	α	23	55		Es at 5% strain	[#domenech-carbo_multitechnique_2013]	1
	Liquitex Heavy Body	Phthalocyanine Blue	1-2 years	Es	4	α	23	55		Immersed in water 10 min, Dried 1 month, Es at 5% strain	[#domenech-carbo_multitechnique_2013]	0
	Liquitex Heavy Body	Phthalocyanine Blue	1-2 years	Es	13	α	23	55		Immersed in water 20 min, Dried 1 month, Es at 5% strain	[#domenech-carbo_multitechnique_2013]	1
	Liquitex Heavy Body	Phthalocyanine Blue	1-2 years	Es	25	α	23	55		Immersed in water 12 hours, Dried 1 month, Es at 5% strain	[#domenech-carbo_multitechnique_2013]	0
	Liquitex Heavy Body	Phthalocyanine Blue	1-2 years	Es	34	α	23	55		Immersed in ethanol 20 min, Dried 1 month, Es at 5% strain	[#domenech-carbo_multitechnique_2013]	1
	Liquitex Heavy Body	Phthalocyanine Blue	1-2 years	Es	79	α	23	55		Immersed in ethanol 12 hours, Dried 1 month, Es at 5% strain	[#domenech-carbo_multitechnique_2013]	0
	Liquitex Heavy Body	Phthalocyanine Blue	1-2 years	Es	96	α	23	55		Immersed in acetone 20 min, Dried 1 month, Es at 5% strain	[#domenech-carbo_multitechnique_2013]	1
	Liquitex Heavy Body	Phthalocyanine Blue	1-2 years	Es	170	α	23	55		Immersed in acetone 12 hours, Dried 1 month, Es at 3% strain	[#domenech-carbo_multitechnique_2013]	0
	Talens	Raw Sienna	1-2 years	Es	23	α	23	55		Es at 5% strain	[#domenech-carbo_multitechnique_2013]	1
	Talens	Raw Sienna	1-2 years	Es	30	α	23	55		Immersed in water 5 min, Dried 1 month, Es at 5% strain	[#domenech-carbo_multitechnique_2013]	0
	Talens	Raw Sienna	1-2 years	Es	42	α	23	55		Immersed in water 20 min, Dried 1 month, Es at 5% strain	[#domenech-carbo_multitechnique_2013]	1
	Talens	Raw Sienna	1-2 years	Es	23	α	23	55		Swabbed with water 5 min, Dried 1 month, Es at 5% strain	[#domenech-carbo_multitechnique_2013]	0
	Talens	Raw Sienna	1-2 years	Es	30	α	23	55		Swabbed with water 20 min, Dried 1 month, Es at 5% strain	[#domenech-carbo_multitechnique_2013]	1
	Talens	Raw Sienna	1-2 years	Es	23	α	23	55		Immersed in ligroin 30 min, Dried 1 month, Es at 5% strain	[#domenech-carbo_multitechnique_2013]	0
	Talens	Raw Sienna	1-2 years	Es	23	α	23	55		Immersed in mineral spirits 30 min, Dried 1 month, Es at 5% strain	[#domenech-carbo_multitechnique_2013]	1
	Talens	Raw Sienna	1-2 years	Es	23	α	23	55		Immersed in mineral spirits/water emulsion 30 min, Dried 1 month, Es at 5% strain	[#domenech-carbo_multitechnique_2013]	0
	Talens	Raw Sienna	1-2 years	Es	30	α	23	55		Exposed to Vanzan gel 30 min, Dried 1 month, Es at 5% strain	[#domenech-carbo_multitechnique_2013]	1
	Talens	Raw Sienna	1-2 years	Es	30	α	23	55		Exposed to Vanzan gel 30 min, Swabbed with water 30 sec, Dried 1 month, Es at 5% strain	[#domenech-carbo_multitechnique_2013]	0
	Talens	Raw Sienna	1-2 years	Es	40	α	23	55		Swabbed with water 30 min, Dried 1 month, Es at 5% strain	[#domenech-carbo_multitechnique_2013]	1
	Liquitex ground (PBA-MMA)	TiO2/CaCO3/talc	1 year	Es	4800	α	-10	50	0.0002	Es at 0.5% strain	[#hagan_effects_2015]	0
	Liquitex ground (PBA-MMA)	TiO2/CaCO3/talc	1 year	Es	3600	α	-10	50	2e-05	Es at 0.5% strain	[#hagan_effects_2015]	1
	Liquitex ground (PBA-MMA)	TiO2/CaCO3/talc	1 year	Es	5240	α	0	50	0.02	Es at 0.5% strain	[#hagan_effects_2015]	0
	Liquitex ground (PBA-MMA)	TiO2/CaCO3/talc	1 year	Es	4000	α	0	50	0.002	Es at 0.5% strain	[#hagan_effects_2015]	1
	Liquitex ground (PBA-MMA)	TiO2/CaCO3/talc	1 year	Es	2580	α	0	50	0.0002	Es at 0.5% strain	[#hagan_effects_2015]	0
	Liquitex ground (PBA-MMA)	TiO2/CaCO3/talc	1 year	Es	1510	α	0	50	2e-05	Es at 0.5% strain	[#hagan_effects_2015]	1
	Liquitex ground (PBA-MMA)	TiO2/CaCO3/talc	1 year	Es	3460	α	10	50	0.02	Es at 0.5% strain	[#hagan_effects_2015]	0
	Liquitex ground (PBA-MMA)	TiO2/CaCO3/talc	1 year	Es	2030	α	10	50	0.002	Es at 0.5% strain	[#hagan_effects_2015]	1
	Liquitex ground (PBA-MMA)	TiO2/CaCO3/talc	1 year	Es	980	α	10	50	0.0002	Es at 0.5% strain	[#hagan_effects_2015]	0
	Liquitex ground (PBA-MMA)	TiO2/CaCO3/talc	1 year	Es	430	α	10	50	2e-05	Es at 0.5% strain	[#hagan_effects_2015]	1
	Liquitex ground (PBA-MMA)	TiO2/CaCO3/talc	1 year	Es	1000	α	20	50	0.02	Es at 0.5% strain	[#hagan_effects_2015]	0
	Liquitex ground (PBA-MMA)	TiO2/CaCO3/talc	1 year	Es	440	α	20	50	0.002	Es at 0.5% strain	[#hagan_effects_2015]	1
	Liquitex ground (PBA-MMA)	TiO2/CaCO3/talc	1 year	Es	170	α	20	50	0.0002	Es at 0.5% strain	[#hagan_effects_2015]	0
	Liquitex ground (PBA-MMA)	TiO2/CaCO3/talc	1 year	Es	80	α	20	50	2e-05	Es at 0.5% strain	[#hagan_effects_2015]	1
	Liquitex ground (PBA-MMA)	TiO2/CaCO3/talc	1 year	Es	360	α	30	50	0.02	Es at 0.5% strain	[#hagan_effects_2015]	0
	Liquitex ground (PBA-MMA)	TiO2/CaCO3/talc	1 year	Es	140	α	30	50	0.002	Es at 0.5% strain	[#hagan_effects_2015]	1
	Liquitex ground (PBA-MMA)	TiO2/CaCO3/talc	1 year	Es	70	α	30	50	0.0002	Es at 0.5% strain	[#hagan_effects_2015]	0
	Liquitex ground (PBA-MMA)	TiO2/CaCO3/talc	1 year	Es	40	α	30	50	2e-05	Es at 0.5% strain	[#hagan_effects_2015]	1
	Golden Artist Colors	Raw Umber	1 year	Es	4870	α	-10	50	0.02	Es at 0.5% strain	[#hagan_effects_2015]	0
	Golden Artist Colors	Raw Umber	1 year	Es	4400	α	-10	50	0.002	Es at 0.5% strain	[#hagan_effects_2015]	1
	Golden Artist Colors	Raw Umber	1 year	Es	3350	α	-10	50	0.0002	Es at 0.5% strain	[#hagan_effects_2015]	0
	Golden Artist Colors	Raw Umber	1 year	Es	2860	α	-10	50	2e-05	Es at 0.5% strain	[#hagan_effects_2015]	1
	Golden Artist Colors	Raw Umber	1 year	Es	4160	α	0	50	0.02	Es at 0.5% strain	[#hagan_effects_2015]	0
	Golden Artist Colors	Raw Umber	1 year	Es	3310	α	0	50	0.002	Es at 0.5% strain	[#hagan_effects_2015]	1
	Golden Artist Colors	Raw Umber	1 year	Es	2520	α	0	50	0.0002	Es at 0.5% strain	[#hagan_effects_2015]	0
	Golden Artist Colors	Raw Umber	1 year	Es	2780	α	10	50	0.02	Es at 0.5% strain	[#hagan_effects_2015]	1
	Golden Artist Colors	Raw Umber	1 year	Es	1940	α	10	50	0.002	Es at 0.5% strain	[#hagan_effects_2015]	0
	Golden Artist Colors	Raw Umber	1 year	Es	1200	α	10	50	0.0002	Es at 0.5% strain	[#hagan_effects_2015]	1
	Golden Artist Colors	Raw Umber	1 year	Es	600	α	10	50	2e-05	Es at 0.5% strain	[#hagan_effects_2015]	0
	Golden Artist Colors	Raw Umber	1 year	Es	1110	α	20	50	0.02	Es at 0.5% strain	[#hagan_effects_2015]	1
	Golden Artist Colors	Raw Umber	1 year	Es	600	α	20	50	0.002	Es at 0.5% strain	[#hagan_effects_2015]	0
	Golden Artist Colors	Raw Umber	1 year	Es	300	α	20	50	0.0002	Es at 0.5% strain	[#hagan_effects_2015]	1
	Golden Artist Colors	Raw Umber	1 year	Es	130	α	20	50	2e-05	Es at 0.5% strain	[#hagan_effects_2015]	0
	Golden Artist Colors	Raw Umber	1 year	Es	380	α	30	50	0.02	Es at 0.5% strain	[#hagan_effects_2015]	1
	Golden Artist Colors	Raw Umber	1 year	Es	170	α	30	50	0.002	Es at 0.5% strain	[#hagan_effects_2015]	0
	Golden Artist Colors	Raw Umber	1 year	Es	85	α	30	50	0.0002	Es at 0.5% strain	[#hagan_effects_2015]	1
	Golden Artist Colors	Raw Umber	1 year	Es	55	α	30	50	2e-05	Es at 0.5% strain	[#hagan_effects_2015]	0
	Speedball	Raw Umber	27 years	Es	3880	α	-10	50	0.02	Es at 0.5% strain	[#hagan_effects_2015]	1
	Speedball	Raw Umber	27 years	Es	3600	α	-10	50	0.002	Es at 0.5% strain	[#hagan_effects_2015]	0
	Speedball	Raw Umber	27 years	Es	3270	α	-10	50	0.0002	Es at 0.5% strain	[#hagan_effects_2015]	1
	Speedball	Raw Umber	27 years	Es	2520	α	-10	50	2e-05	Es at 0.5% strain	[#hagan_effects_2015]	0
	Speedball	Raw Umber	27 years	Es	3380	α	0	50	0.02	Es at 0.5% strain	[#hagan_effects_2015]	1
	Speedball	Raw Umber	27 years	Es	2780	α	0	50	0.002	Es at 0.5% strain	[#hagan_effects_2015]	0
	Speedball	Raw Umber	27 years	Es	2170	α	0	50	0.0002	Es at 0.5% strain	[#hagan_effects_2015]	1
	Speedball	Raw Umber	27 years	Es	1270	α	0	50	2e-05	Es at 0.5% strain	[#hagan_effects_2015]	0
	Speedball	Raw Umber	27 years	Es	2380	α	10	50	0.02	Es at 0.5% strain	[#hagan_effects_2015]	1
	Speedball	Raw Umber	27 years	Es	1440	α	10	50	0.002	Es at 0.5% strain	[#hagan_effects_2015]	0
	Speedball	Raw Umber	27 years	Es	660	α	10	50	0.0002	Es at 0.5% strain	[#hagan_effects_2015]	1
	Speedball	Raw Umber	27 years	Es	260	α	10	50	2e-05	Es at 0.5% strain	[#hagan_effects_2015]	0
	Speedball	Raw Umber	27 years	Es	540	α	20	50	0.02	Es at 0.5% strain	[#hagan_effects_2015]	1
	Speedball	Raw Umber	27 years	Es	190	α	20	50	0.002	Es at 0.5% strain	[#hagan_effects_2015]	0
	Speedball	Raw Umber	27 years	Es	82	α	20	50	0.0002	Es at 0.5% strain	[#hagan_effects_2015]	1
	Speedball	Raw Umber	27 years	Es	45	α	20	50	2e-05	Es at 0.5% strain	[#hagan_effects_2015]	0
	Speedball	Raw Umber	27 years	Es	110	α	30	50	0.02	Es at 0.5% strain	[#hagan_effects_2015]	1
	Speedball	Raw Umber	27 years	Es	59	α	30	50	0.002	Es at 0.5% strain	[#hagan_effects_2015]	0
	Speedball	Raw Umber	27 years	Es	34	α	30	50	0.0002	Es at 0.5% strain	[#hagan_effects_2015]	1
	Speedball	Raw Umber	27 years	Es	23	α	30	50	2e-05	Es at 0.5% strain	[#hagan_effects_2015]	0
	Liquitex	Burnt Umber	27 years	Es	3530	α	-10	50	0.0002	Es at 0.5% strain	[#hagan_effects_2015]	1
	Liquitex	Burnt Umber	27 years	Es	2800	α	-10	50	2e-05	Es at 0.5% strain	[#hagan_effects_2015]	0
	Liquitex	Burnt Umber	27 years	Es	3590	α	0	50	0.02	Es at 0.5% strain	[#hagan_effects_2015]	1
	Liquitex	Burnt Umber	27 years	Es	3210	α	0	50	0.002	Es at 0.5% strain	[#hagan_effects_2015]	0
	Liquitex	Burnt Umber	27 years	Es	2650	α	0	50	0.0002	Es at 0.5% strain	[#hagan_effects_2015]	1
	Liquitex	Burnt Umber	27 years	Es	1900	α	0	50	2e-05	Es at 0.5% strain	[#hagan_effects_2015]	0
	Liquitex	Burnt Umber	27 years	Es	2700	α	10	50	0.02	Es at 0.5% strain	[#hagan_effects_2015]	1
	Liquitex	Burnt Umber	27 years	Es	1820	α	10	50	0.002	Es at 0.5% strain	[#hagan_effects_2015]	0
	Liquitex	Burnt Umber	27 years	Es	1270	α	10	50	0.0002	Es at 0.5% strain	[#hagan_effects_2015]	1
	Liquitex	Burnt Umber	27 years	Es	630	α	10	50	2e-05	Es at 0.5% strain	[#hagan_effects_2015]	0
	Liquitex	Burnt Umber	27 years	Es	960	α	20	50	0.02	Es at 0.5% strain	[#hagan_effects_2015]	1
	Liquitex	Burnt Umber	27 years	Es	460	α	20	50	0.002	Es at 0.5% strain	[#hagan_effects_2015]	0
	Liquitex	Burnt Umber	27 years	Es	280	α	20	50	0.0002	Es at 0.5% strain	[#hagan_effects_2015]	1
	Liquitex	Burnt Umber	27 years	Es	140	α	20	50	2e-05	Es at 0.5% strain	[#hagan_effects_2015]	0
	Liquitex	Burnt Umber	27 years	Es	340	α	30	50	0.02	Es at 0.5% strain	[#hagan_effects_2015]	1
	Liquitex	Burnt Umber	27 years	Es	180	α	30	50	0.002	Es at 0.5% strain	[#hagan_effects_2015]	0
	Liquitex	Burnt Umber	27 years	Es	120	α	30	50	0.0002	Es at 0.5% strain	[#hagan_effects_2015]	1
	Liquitex	Burnt Umber	27 years	Es	100	α	30	50	2e-05	Es at 0.5% strain	[#hagan_effects_2015]	0

## Sheet: Oil-Parse
	Column1	Column2	Column3	Column4	Column5	Column6	Column7	Column8	Column9	Column10	Title
	Gamblin Artists Oil Colors	Raw Umber	15 years		7		23	50	0.0005	Es measured at 1% strain	0
	Grumbacher Pretested Artists Oil Colors	Raw Umber	15 years		20		23	50	0.0005	Es measured at 1% strain	1
	Gamblin Artists Oil Colors	Burnt Umber	15 years		22		23	50	0.0005	Es measured at 1% strain	0
	Grumbacher Pretested Artists Oil Colors	Burnt Umber	15 years		47		23	50	0.0005	Es measured at 1% strain	1
	Speedball	Burnt Umber	33 years		32		23	50	0.0005	Es measured at 1% strain	0
	Winsor & Newton Titanium White (professional series): Safflower Oil	TiO2/ZnO	6 years		3420		-10	50	0.02	Es measured at 0.5% strain	1
	Winsor & Newton Titanium White (professional series): Safflower Oil	TiO2/ZnO	6 years		2830		-10	50	0.002	Es measured at 0.5% strain	0
	Winsor & Newton Titanium White (professional series): Safflower Oil	TiO2/ZnO	6 years		2100		-10	50	0.0002	Es measured at 0.5% strain	1
	Winsor & Newton Titanium White (professional series): Safflower Oil	TiO2/ZnO	6 years		1720		-10	50	2e-05	Es measured at 0.5% strain	0
	Winsor & Newton Titanium White (professional series): Safflower Oil	TiO2/ZnO	6 years		1440		10	50	0.02	Es measured at 0.5% strain	1
	Winsor & Newton Titanium White (professional series): Safflower Oil	TiO2/ZnO	6 years		1310		10	50	0.02	Es measured at 0.5% strain	0
	Winsor & Newton Titanium White (professional series): Safflower Oil	TiO2/ZnO	6 years		900		20	50	0.002	Es measured at 0.5% strain	1
	Winsor & Newton Titanium White (professional series): Safflower Oil	TiO2/ZnO	6 years		870		10	50	0.0002	Es measured at 0.5% strain	0
	Winsor & Newton Titanium White (professional series): Safflower Oil	TiO2/ZnO	6 years		650		20	50	0.0002	Es measured at 0.5% strain	1
	Winsor & Newton Titanium White (professional series): Safflower Oil	TiO2/ZnO	6 years		650		10	50	2e-05	Es measured at 0.5% strain	0
	Winsor & Newton Titanium White (professional series): Safflower Oil	TiO2/ZnO	6 years		470		20	50	2e-05	Es measured at 0.5% strain	1
	Winsor & Newton Zinc White (professional series): Safflower Oil	ZnO	6-10 years		1890		0	50	0.02	Es measured at 0.5% strain	0
	Winsor & Newton Zinc White (professional series): Safflower Oil	ZnO	6-10 years		1600		-10	50	2e-05	Es measured at 0.5% strain	1
	Winsor & Newton Zinc White (professional series): Safflower Oil	ZnO	6-10 years		1380		0	50	0.002	Es measured at 0.5% strain	0
	Winsor & Newton Zinc White (professional series): Safflower Oil	ZnO	6-10 years		1180		10	50	0.02	Es measured at 0.5% strain	1
	Winsor & Newton Zinc White (professional series): Safflower Oil	ZnO	6-10 years		1060		0	50	0.0002	Es measured at 0.5% strain	0
	Winsor & Newton Zinc White (professional series): Safflower Oil	ZnO	6-10 years		890		10	50	0.002	Es measured at 0.5% strain	1
	Winsor & Newton Zinc White (professional series): Safflower Oil	ZnO	6-10 years		760		0	50	2e-05	Es measured at 0.5% strain	0
	Winsor & Newton Zinc White (professional series): Safflower Oil	ZnO	6-10 years		720		10	50	0.0002	Es measured at 0.5% strain	1
	Winsor & Newton Zinc White (professional series): Safflower Oil	ZnO	6-10 years		520		10	50	2e-05	Es measured at 0.5% strain	0
	Michael Harding Zinc White: Cold-Pressed Linseed Oil	ZnO	6-10 years		2180		0	50	0.02	Es measured at 0.5% strain	1
	Michael Harding Zinc White: Cold-Pressed Linseed Oil	ZnO	6-10 years		1720		0	50	0.002	Es measured at 0.5% strain	0
	Michael Harding Zinc White: Cold-Pressed Linseed Oil	ZnO	6-10 years		1590		10	50	0.02	Es measured at 0.5% strain	1
	Michael Harding Zinc White: Cold-Pressed Linseed Oil	ZnO	6-10 years		1280		0	50	0.0002	Es measured at 0.5% strain	0
	Michael Harding Zinc White: Cold-Pressed Linseed Oil	ZnO	6-10 years		1110		10	50	0.002	Es measured at 0.5% strain	1
	Michael Harding Zinc White: Cold-Pressed Linseed Oil	ZnO	6-10 years		990		20	50	0.02	Es measured at 0.5% strain	0
	Michael Harding Zinc White: Cold-Pressed Linseed Oil	ZnO	6-10 years		880		10	50	0.0002	Es measured at 0.5% strain	1
	Michael Harding Zinc White: Cold-Pressed Linseed Oil	ZnO	6-10 years		780		20	50	0.002	Es measured at 0.5% strain	0
	Michael Harding Zinc White: Cold-Pressed Linseed Oil	ZnO	6-10 years		620		10	50	2e-05	Es measured at 0.5% strain	1
	Michael Harding Zinc White: Cold-Pressed Linseed Oil	ZnO	6-10 years		590		20	50	0.0002	Es measured at 0.5% strain	0
	Michael Harding Zinc White: Cold-Pressed Linseed Oil	ZnO	6-10 years		440		20	50	2e-05	Es measured at 0.5% strain	1
	Michael Harding Flake White: Refined Linseed Oil	Basic PbCO3/ZnO	6-10 years		1440		10	50	0.02	Es measured at 0.5% strain	0
	Michael Harding Flake White: Refined Linseed Oil	Basic PbCO3/ZnO	6-10 years		1160		10	50	0.002	Es measured at 0.5% strain	1
	Michael Harding Flake White: Refined Linseed Oil	Basic PbCO3/ZnO	6-10 years		940		20	50	0.02	Es measured at 0.5% strain	0
	Michael Harding Flake White: Refined Linseed Oil	Basic PbCO3/ZnO	6-10 years		670		20	50	0.002	Es measured at 0.5% strain	1
	Michael Harding Flake White: Refined Linseed Oil	Basic PbCO3/ZnO	6-10 years		610		10	50	2e-05	Es measured at 0.5% strain	0
	Michael Harding Flake White: Refined Linseed Oil	Basic PbCO3/ZnO	6-10 years		550		20	50	0.0002	Es measured at 0.5% strain	1
	Michael Harding Flake White: Refined Linseed Oil	Basic PbCO3/ZnO	6-10 years		390		20	50	2e-05	Es measured at 0.5% strain	0
	Winsor & Newton Artisan Titanium White: Drying oil/additives	TiO2	6-10 years		1080		-10	50	0.02	Es measured at 0.5% strain	1
	Winsor & Newton Artisan Titanium White: Drying oil/additives	TiO2	6-10 years		690		-10	50	0.002	Es measured at 0.5% strain	0
	Winsor & Newton Artisan Titanium White: Drying oil/additives	TiO2	6-10 years		440		-10	50	0.0002	Es measured at 0.5% strain	1
	Winsor & Newton Artisan Titanium White: Drying oil/additives	TiO2	6-10 years		320		0	50	0.002	Es measured at 0.5% strain	0
	Winsor & Newton Artisan Titanium White: Drying oil/additives	TiO2	6-10 years		310		10	50	0.02	Es measured at 0.5% strain	1
	Winsor & Newton Artisan Titanium White: Drying oil/additives	TiO2	6-10 years		260		-10	50	2e-05	Es measured at 0.5% strain	0
	Winsor & Newton Artisan Titanium White: Drying oil/additives	TiO2	6-10 years		200		10	50	0.002	Es measured at 0.5% strain	1
	Winsor & Newton Artisan Titanium White: Drying oil/additives	TiO2	6-10 years		190		20	50	0.02	Es measured at 0.5% strain	0
	Winsor & Newton Artisan Titanium White: Drying oil/additives	TiO2	6-10 years		130		10	50	0.0002	Es measured at 0.5% strain	1
	Winsor & Newton Artisan Titanium White: Drying oil/additives	TiO2	6-10 years		120		20	50	0.002	Es measured at 0.5% strain	0
	Winsor & Newton Artisan Titanium White: Drying oil/additives	TiO2	6-10 years		80		10	50	2e-05	Es measured at 0.5% strain	1
	Winsor & Newton Artisan Titanium White: Drying oil/additives	TiO2	6-10 years		70		20	50	0.0002	Es measured at 0.5% strain	0
	Winsor & Newton Artisan Titanium White: Drying oil/additives	TiO2	6-10 years		40		20	50	2e-05	Es measured at 0.5% strain	1

## Sheet: Alkyd-Parse
Column1	Column2	Column3	Column4	Column5	Column6	Column7	Column8	Column9	Column10	Column11	Column12	Title
		Alizarine Crimson	10+ years	E	758		23	50		Strain rates from this reference ranged from 0.001-0.01 s-1.	[#erlebacher_effects_1992]	0
		Alizarine Crimson	10 + years	E	1257		23	5		Strain rates from this reference ranged from 0.001-0.01 s-1.	[#erlebacher_effects_1992]	1
		Alizarine Crimson	10 + years	E	4540		-5	5		Strain rates from this reference ranged from 0.001-0.01 s-1.	[#erlebacher_effects_1992]	0
		Burnt Umber	10+ years	E	1990		23	50		Strain rates from this reference ranged from 0.001-0.01 s-1.	[#erlebacher_effects_1992]	1
		Burnt Umber	10+ years	E	2794		23	5		Strain rates from this reference ranged from 0.001-0.01 s-1.	[#erlebacher_effects_1992]	0
		Cadmium Yellow	10+ years	E	1327		23	50		Strain rates from this reference ranged from 0.001-0.01 s-1.	[#erlebacher_effects_1992]	1
		Cadmium Yellow	10+ years	E	2968		23	5		Strain rates from this reference ranged from 0.001-0.01 s-1.	[#erlebacher_effects_1992]	0
		Iron Oxide Red	10+ years	E	1152		23	50		Strain rates from this reference ranged from 0.001-0.01 s-1.	[#erlebacher_effects_1992]	1
		Iron Oxide Red	10+ years	E	2095		23	5		Strain rates from this reference ranged from 0.001-0.01 s-1.	[#erlebacher_effects_1992]	0
		Iron Oxide Red	10+ years	E	9079		-5	5		Strain rates from this reference ranged from 0.001-0.01 s-1.	[#erlebacher_effects_1992]	1
		Ivory Black	10+ years	E	559		23	50		Strain rates from this reference ranged from 0.001-0.01 s-1.	[#erlebacher_effects_1992]	0
		Ivory Black	10+ years	E	1257		23	5		Strain rates from this reference ranged from 0.001-0.01 s-1.	[#erlebacher_effects_1992]	1
		Lead White	10+ years	E	4190		23	50		Strain rates from this reference ranged from 0.001-0.01 s-1.	[#erlebacher_effects_1992]	0
		Lead White	10+ years	E	5936		23	5		Strain rates from this reference ranged from 0.001-0.01 s-1.	[#erlebacher_effects_1992]	1
		Lead White	10+ years	E	8730		-5	5		Strain rates from this reference ranged from 0.001-0.01 s-1.	[#erlebacher_effects_1992]	0
		Titanium White	10+ years	E	1921		23	50		Strain rates from this reference ranged from 0.001-0.01 s-1.	[#erlebacher_effects_1992]	1
		Titanium White	10+ years	E	4400		23	5		Strain rates from this reference ranged from 0.001-0.01 s-1.	[#erlebacher_effects_1992]	0
		Yellow Ochre	10+ years	E	978		23	50		Strain rates from this reference ranged from 0.001-0.01 s-1.	[#erlebacher_effects_1992]	1
		Yellow Ochre	10+ years	E	2095		23	5		Strain rates from this reference ranged from 0.001-0.01 s-1.	[#erlebacher_effects_1992]	0
	Alkyd Emulsion (URADIL AZ554 Z-50)	Cobalt drier	3 days	E	8.2	α				Ambient Conditions, Load Relaxation, Film Thickness: 0.4 mm	[#mirone_elastic_2004]	1
	Alkyd Emulsion (URADIL AZ554 Z-50)	Cobalt drier	3 days	E	7.4	α				Ambient Conditions, Load Relaxation, Film Thickness: 0.7 mm	[#mirone_elastic_2004]	0
	Alkyd Emulsion (URADIL AZ554 Z-50)	Cobalt drier	3 days	E	7.0	α				Ambient Conditions, Load Relaxation, Film Thickness: 1 mm	[#mirone_elastic_2004]	1
	Alkyd Emulsion (URADIL AZ554 Z-50)	Cobalt drier	3 days	E	5.6	α				Ambient Conditions, Load Relaxation, Film Thickness: 1.4 mm	[#mirone_elastic_2004]	0
	Alkyd Emulsion (URADIL AZ554 Z-50)	Cobalt drier	11 days	E	21.0	α				Ambient Conditions, Load Relaxation, Film Thickness: 0.4 mm	[#mirone_elastic_2004]	1
	Alkyd Emulsion (URADIL AZ554 Z-50)	Cobalt drier	11 days	E	17.2	α				Ambient Conditions, Load Relaxation, Film Thickness: 0.7 mm	[#mirone_elastic_2004]	0
	Alkyd Emulsion (URADIL AZ554 Z-50)	Cobalt drier	11 days	E	14.5	α				Ambient Conditions, Load Relaxation, Film Thickness: 1 mm	[#mirone_elastic_2004]	1
	Alkyd Emulsion (URADIL AZ554 Z-50)	Cobalt drier	11 days	E	10.4	α				Ambient Conditions, Load Relaxation, Film Thickness: 1.4 mm	[#mirone_elastic_2004]	0
	Alkyd Emulsion (URADIL AZ554 Z-50)	Cobalt drier	19 days	E	31.4	α				Ambient Conditions, Load Relaxation, Film Thickness: 0.4 mm	[#mirone_elastic_2004]	1
	Alkyd Emulsion (URADIL AZ554 Z-50)	Cobalt drier	19 days	E	25.1	α				Ambient Conditions, Load Relaxation, Film Thickness: 0.7 mm	[#mirone_elastic_2004]	0
	Alkyd Emulsion (URADIL AZ554 Z-50)	Cobalt drier	19 days	E	19.7	α				Ambient Conditions, Load Relaxation, Film Thickness: 1 mm	[#mirone_elastic_2004]	1
	Alkyd Emulsion (URADIL AZ554 Z-50)	Cobalt drier	19 days	E	13.7	α				Ambient Conditions, Load Relaxation, Film Thickness: 1.4 mm	[#mirone_elastic_2004]	0
	Alkyd Emulsion (URADIL AZ554 Z-50)	Cobalt drier	30 days	E	36.0	α				Ambient Conditions, Load Relaxation, Film Thickness: 0.2 mm	[#mirone_elastic_2004]	1
	Alkyd Emulsion (URADIL AZ554 Z-50)	Cobalt drier	30 days	E	35.5	α				Ambient Conditions, Load Relaxation, Film Thickness: 0.4 mm	[#mirone_elastic_2004]	0
	Alkyd Emulsion (URADIL AZ554 Z-50)	Cobalt drier	30 days	E	29.6	α				Ambient Conditions, Load Relaxation, Film Thickness: 0.7 mm	[#mirone_elastic_2004]	1
	Alkyd Emulsion (URADIL AZ554 Z-50)	Cobalt drier	30 days	E	23.7	α				Ambient Conditions, Load Relaxation, Film Thickness: 1 mm	[#mirone_elastic_2004]	0
	Alkyd Emulsion (URADIL AZ554 Z-50)	Cobalt drier	30 days	E	18.3	α				Ambient Conditions, Load Relaxation, Film Thickness: 1.2 mm	[#mirone_elastic_2004]	1
	Dulux: Nondrip Gloss - Pure Brilliant White		3 months	σT	9.2	α	21	50	0.002		[#hagan_factors_2007]	0
	Dulus Trade: High Gloss - Pure Brilliant White		3 months	σT	6.6	α	21	50	0.002		[#hagan_factors_2007]	1
	Crown: Nondrip Gloss - Pure Brilliant White		3 months	σT	6.5	α	21	50	0.002		[#hagan_factors_2007]	0
	Griffin (Windsor & Newton)	Titanium White	3 months	σT	5	α	21	50	0.002		[#hagan_factors_2007]	1
Golden Acrylic Gesso Primer	Winsor & Newton Griffin	Cadmium Sulfoselenide	6 days ambient, 94 days thermal aging	Es	0.36		20	55	0.001	2-layer system; Thermal aging: 60°C/55% RH, Es at 0.5% strain	[#young_interfacial_2007]	0
Golden Acrylic Gesso Primer	Winsor & Newton Griffin	Cadmium Sulfoselenide	6 days ambient, 94 days thermal aging	Es	0.15		20	55	0.001	2-layer system; Thermal aging: 60°C/55% RH, Es at 0.5% strain	[#young_interfacial_2007]	1
Golden Acrylic Gesso Primer	Winsor & Newton Griffin	Cadmium Sulfoselenide	6 days ambient, 0 days thermal aging	Es	0.21		20	55	0.001	2-layer system; Thermal aging: 60°C/55% RH, Es at 0.5% strain	[#young_interfacial_2007]	0
Golden Acrylic Gesso Primer	Winsor & Newton Griffin	Cadmium Sulfoselenide	6 days ambient, 0 days thermal aging	Es	0.08		20	55	0.001	2-layer system; Thermal aging: 60°C/55% RH, Es at 0.5% strain	[#young_interfacial_2007]	1
Roberson Acrylic Primer	Winsor & Newton Griffin	Cadmium Sulfoselenide	6 days ambient, 94 days thermal aging	Es	0.08		20	55	0.001	2-layer system; Thermal aging: 60°C/55% RH, Es at 0.5% strain	[#young_interfacial_2007]	0
Roberson Acrylic Primer	Winsor & Newton Griffin	Cadmium Sulfoselenide	6 days ambient, 94 days thermal aging	Es	0.11		20	55	0.001	2-layer system; Thermal aging: 60°C/55% RH, Es at 0.5% strain	[#young_interfacial_2007]	1
Roberson Acrylic Primer	Winsor & Newton Griffin	Cadmium Sulfoselenide	6 days ambient, 0 days thermal aging	Es	0.08		20	55	0.001	2-layer system; Thermal aging: 60°C/55% RH, Es at 0.5% strain	[#young_interfacial_2007]	0
Roberson Acrylic Primer	Winsor & Newton Griffin	Cadmium Sulfoselenide	6 days ambient, 0 days thermal aging	Es	0.09		20	55	0.001	2-layer system; Thermal aging: 60°C/55% RH, Es at 0.5% strain	[#young_interfacial_2007]	1
Winsor & Newton Alkyd Primer	Winsor & Newton Griffin	Cadmium Sulfoselenide	6 days ambient, 64 days thermal aging	Es	1.06		20	55	0.001	2-layer system; Thermal aging: 60°C/55% RH, Es at 0.5% strain	[#young_interfacial_2007]	0
Winsor & Newton Alkyd Primer	Winsor & Newton Griffin	Cadmium Sulfoselenide	6 days ambient, 0 days thermal aging	Es	0.24		20	55	0.001	2-layer system; Thermal aging: 60°C/55% RH, Es at 0.5% strain	[#young_interfacial_2007]	1
Winsor & Newton Alkyd Primer	Winsor & Newton Griffin	Cadmium Sulfoselenide	6 days ambient, 0 days thermal aging	Es	0.17		20	55	0.001	2-layer system; Thermal aging: 60°C/55% RH, Es at 0.5% strain	[#young_interfacial_2007]	0
Spectrum Alkyd Primer	Winsor & Newton Griffin	Cadmium Sulfoselenide	6 days ambient, 94 days thermal aging	Es	0.07		20	55	0.001	2-layer system; Thermal aging: 60°C/55% RH, Es at 0.5% strain	[#young_interfacial_2007]	1
Spectrum Alkyd Primer	Winsor & Newton Griffin	Cadmium Sulfoselenide	6 days ambient, 94 days thermal aging	Es	0.18		20	55	0.001	2-layer system; Thermal aging: 60°C/55% RH, Es at 0.5% strain	[#young_interfacial_2007]	0
Spectrum Alkyd Primer	Winsor & Newton Griffin	Cadmium Sulfoselenide	6 days ambient, 0 days thermal aging	Es	0.05		20	55	0.001	2-layer system; Thermal aging: 60°C/55% RH, Es at 0.5% strain	[#young_interfacial_2007]	1
Spectrum Alkyd Primer	Winsor & Newton Griffin	Cadmium Sulfoselenide	6 days ambient, 0 days thermal aging	Es	0.01		20	55	0.001	2-layer system; Thermal aging: 60°C/55% RH, Es at 0.5% strain	[#young_interfacial_2007]	0
	Winsor & Newton Alkyd Primer		7 months	E	6340		-10	55	0.002		[#young_cold_2008]	1
	Winsor & Newton Alkyd Primer		7 months	E	6020		0	60	0.002		[#young_cold_2008]	0
	Winsor & Newton Alkyd Primer		7 months	E	4350		10	57	0.002		[#young_cold_2008]	1
	Winsor & Newton Alkyd Primer		7 months	E	2720		20	54	0.002		[#young_cold_2008]	0
	Spectrum Primer		7 months	E	4570		-10	55	0.002		[#young_cold_2008]	1
	Spectrum Primer		7 months	E	3240		0	60	0.002		[#young_cold_2008]	0
	Spectrum Primer		7 months	E	2170		10	57	0.002		[#young_cold_2008]	1
	Spectrum Primer		7 months	E	1080		20	54	0.002		[#young_cold_2008]	0
	Roberson Primer		7 months	E	6060		-10	55	0.002		[#young_cold_2008]	1
	Roberson Primer		7 months	E	3940		0	60	0.002		[#young_cold_2008]	0
	Roberson Primer		7 months	E	2760		10	57	0.002		[#young_cold_2008]	1
	Roberson Primer		7 months	E	990		20	54	0.002		[#young_cold_2008]	0
	Winsor & Newton Griffin	Alizarin Red	5 months	Es	4	α				Ambient Conditions, Es at 1% strain	[#fuesers_influence_2008]	1
	Winsor & Newton Griffin	Phthalocyanine Blue	5 months	Es	12	α				Ambient Conditions, Es at 1% strain	[#fuesers_influence_2008]	0
	Winsor & Newton Griffin	Ivory Black	5 months	Es	42	α				Ambient Conditions, Es at 1% strain	[#fuesers_influence_2008]	1
	Winsor & Newton Griffin	Titanium White	5 months	Es	270	α				Ambient Conditions, Es at 1% strain	[#fuesers_influence_2008]	0
	Winsor & Newton Griffin	Hansa Yellow	5 months	Es	7	α				Ambient Conditions, Es at 1% strain	[#fuesers_influence_2008]	1
	Winsor & Newton Griffin	Hansa Yellow	5 months	Es	8	α				Ambient Conditions, Es at 1% strain, Immersed in water 1 min, Dried 4 weeks	[#fuesers_influence_2008]	0
	Winsor & Newton Griffin	Hansa Yellow	5 months	Es	12	α				Ambient Conditions, Es at 1% strain, Immersed in n-hexane 1 min, Dried 4 weeks	[#fuesers_influence_2008]	1
	Winsor & Newton Griffin	Hansa Yellow	5 months	Es	9	α				Ambient Conditions, Es at 1% strain, Immersed in ethanol 1 min, Dried 4 weeks	[#fuesers_influence_2008]	0
	Winsor & Newton Griffin	Hansa Yellow	5 months	Es	15	α				Ambient Conditions, Es at 1% strain, Immersed in toluene 1 min, Dried 4 weeks	[#fuesers_influence_2008]	1
	Winsor & Newton Griffin	Hansa Yellow	5 months	Es	21	α				Ambient Conditions, Es at 1% strain, Immersed in diethyl ether 1 min, Dried 4 weeks	[#fuesers_influence_2008]	0
	Winsor & Newton Griffin	Hansa Yellow	5 months	Es	13	α				Ambient Conditions, Es at 1% strain, Immersed in chloroform 1 min, Dried 4 weeks	[#fuesers_influence_2008]	1
	Winsor & Newton Griffin	Hansa Yellow	5 months	Es	49	α				Ambient Conditions, Es at 1% strain, Immersed in acetone 1 min, Dried 4 weeks	[#fuesers_influence_2008]	0
	DIY Indoor/Outdoor Alkyd	Alizarin Red	5 months	Es	110	α				Ambient Conditions, Es at 1% strain	[#fuesers_influence_2008]	1
	DIY Indoor/Outdoor Alkyd	Phthalocyanine Blue	5 months	Es	140	α				Ambient Conditions, Es at 1% strain	[#fuesers_influence_2008]	0
	DIY Indoor/Outdoor Alkyd	Ivory Black	5 months	Es	190	α				Ambient Conditions, Es at 1% strain	[#fuesers_influence_2008]	1
	DIY Indoor/Outdoor Alkyd	Titanium White	5 months	Es	270	α				Ambient Conditions, Es at 1% strain	[#fuesers_influence_2008]	0
	DIY Indoor/Outdoor Alkyd	Hansa Yellow	5 months	Es	120	α				Ambient Conditions, Es at 1% strain	[#fuesers_influence_2008]	1
	DIY Indoor/Outdoor Alkyd	Hansa Yellow	5 months	Es	105	α				Ambient Conditions, Es at 1% strain, Immersed in water 1 min, Dried 4 weeks	[#fuesers_influence_2008]	0
	DIY Indoor/Outdoor Alkyd	Hansa Yellow	5 months	Es	108	α				Ambient Conditions, Es at 1% strain, Immersed in n-hexane 1 min, Dried 4 weeks	[#fuesers_influence_2008]	1
	DIY Indoor/Outdoor Alkyd	Hansa Yellow	5 months	Es	124	α				Ambient Conditions, Es at 1% strain, Immersed in ethanol 1 min, Dried 4 weeks	[#fuesers_influence_2008]	0
	DIY Indoor/Outdoor Alkyd	Hansa Yellow	5 months	Es	135	α				Ambient Conditions, Es at 1% strain, Immersed in toluene 1 min, Dried 4 weeks	[#fuesers_influence_2008]	1
	DIY Indoor/Outdoor Alkyd	Hansa Yellow	5 months	Es	119	α				Ambient Conditions, Es at 1% strain, Immersed in diethyl ether 1 min, Dried 4 weeks	[#fuesers_influence_2008]	0
	DIY Indoor/Outdoor Alkyd	Hansa Yellow	5 months	Es	160	α				Ambient Conditions, Es at 1% strain, Immersed in chloroform 1 min, Dried 4 weeks	[#fuesers_influence_2008]	1
	DIY Indoor/Outdoor Alkyd	Hansa Yellow	5 months	Es	168	α				Ambient Conditions, Es at 1% strain, Immersed in acetone 1 min, Dried 4 weeks	[#fuesers_influence_2008]	0
	Winsor & Newton Griffin	Titanium Dioxide	7 years	Es	125	α	23	50	0.0005	Es measured at 0.5% strain	[#mecklenburg_influence_2013]	1
	Gamblin "Alkyd White"	Zinc Oxide	7 years	Es	580	α	23	50	0.0005	Es measured at 0.5% strain	[#mecklenburg_influence_2013]	0
	Winsor & Newton Griffin	Cobalt Blue	7 years	Es	75	α	23	50	0.0005	Es measured at 0.5% strain	[#mecklenburg_influence_2013]	1
	Winsor & Newton	Flake White	29 years	Es	2780	α	23	50	0.0005	Es measured at 0.25% strain	[#mecklenburg_influence_2013]	0
	Winsor & Newton	Burnt Umber	29 years	Es	1720	α	23	50	0.0005	Es measured at 0.5% strain	[#mecklenburg_influence_2013]	1
	Winsor & Newton	Titanium White	29 years	Es	980	α	23	50	0.0005	Es measured at 1% strain	[#mecklenburg_influence_2013]	0
	Winsor & Newton	Alizarin Crimson	20 years	Es	150	α	23	50	0.0005	Es measured at 1% strain	[#mecklenburg_influence_2013]	1
	Winsor & Newton	Alizarin Crimson	29 years	Es	240	α	23	50	0.0005	Es measured at 1% strain	[#mecklenburg_influence_2013]	0
	Winsor & Newton	Alizarin Crimson	29 years	Es	260	α	23	50	0.0005	Immersed in Acetone 30 sec and dried, Es measured at 1% strain	[#mecklenburg_influence_2013]	1
	Winsor & Newton	Alizarin Crimson	29 years	Es	280	α	23	50	0.0005	Immersed in Methanol 30 sec and dried, Es measured at 1% strain	[#mecklenburg_influence_2013]	0
	Winsor & Newton	Yellow Ochre	29 years	Es	150	α	23	50	0.0005	Es measured at 1% strain	[#mecklenburg_influence_2013]	1
	Winsor & Newton	Ivory Black	29 years	Es	140	α	23	50	0.0005	Es measured at 1% strain	[#mecklenburg_influence_2013]	0
	Winsor & Newton Griffin Titanium White: Oil-modified alkyd	TiO2	6-10 years	Es	4850	α	-10	50	0.002	Es measured at 0.5% strain	[#hagan_thermo-mechanical_2017]	1
	Winsor & Newton Griffin Titanium White: Oil-modified alkyd	TiO2	6-10 years	Es	4480	α	-10	50	0.0002	Es measured at 0.5% strain	[#hagan_thermo-mechanical_2017]	0
	Winsor & Newton Griffin Titanium White: Oil-modified alkyd	TiO2	6-10 years	Es	4270	α	0	50	0.002	Es measured at 0.5% strain	[#hagan_thermo-mechanical_2017]	1
	Winsor & Newton Griffin Titanium White: Oil-modified alkyd	TiO2	6-10 years	Es	3370	α	-10	50	0.00002	Es measured at 0.5% strain	[#hagan_thermo-mechanical_2017]	0
	Winsor & Newton Griffin Titanium White: Oil-modified alkyd	TiO2	6-10 years	Es	3010	α	10	50	0.02	Es measured at 0.5% strain	[#hagan_thermo-mechanical_2017]	1
	Winsor & Newton Griffin Titanium White: Oil-modified alkyd	TiO2	6-10 years	Es	2560	α	10	50	0.002	Es measured at 0.5% strain	[#hagan_thermo-mechanical_2017]	0
	Winsor & Newton Griffin Titanium White: Oil-modified alkyd	TiO2	6-10 years	Es	1350	α	20	50	0.02	Es measured at 0.5% strain	[#hagan_thermo-mechanical_2017]	1
	Winsor & Newton Griffin Titanium White: Oil-modified alkyd	TiO2	6-10 years	Es	1120	α	10	50	0.0002	Es measured at 0.5% strain	[#hagan_thermo-mechanical_2017]	0
	Winsor & Newton Griffin Titanium White: Oil-modified alkyd	TiO2	6-10 years	Es	790	α	20	50	0.002	Es measured at 0.5% strain	[#hagan_thermo-mechanical_2017]	1
	Winsor & Newton Griffin Titanium White: Oil-modified alkyd	TiO2	6-10 years	Es	680	α	10	50	0.00002	Es measured at 0.5% strain	[#hagan_thermo-mechanical_2017]	0
	Winsor & Newton Griffin Titanium White: Oil-modified alkyd	TiO2	6-10 years	Es	410	α	20	50	0.0002	Es measured at 0.5% strain	[#hagan_thermo-mechanical_2017]	1
